# Supplementary material for: Generalised anxiety disorder and hospital admissions: findings from a large, population cohort study
Source: PubMed Central journal article supplement (PMC6224748; doi:10.1136/bmjopen-2017-018539), 2018-10-27
Supplement: bmjopen-2017-018539.draft_revisions.pdf [file bmjopen-2017-018539.draft_revisions.pdf]

# BMJ Open

BMJ Open is committed to open peer review. As part of this commitment we make the peer review history of every article we publish publicly available.

When an article is published we post the peer reviewers' comments and the authors' responses online. We also post the versions of the paper that were used during peer review. These are the versions that the peer review comments apply to.

The versions of the paper that follow are the versions that were submitted during the peer review process. They are not the versions of record or the final published versions. They should not be cited or distributed as the published version of this manuscript.

BMJ Open is an open access journal and the full, final, typeset and author-corrected version of record of the manuscript is available on our site with no access controls, subscription charges or pay-per-view fees (<http://bmjopen.bmj.com>).

If you have any questions on BMJ Open's open peer review process please email [editorial.bmjopen@bmj.com](mailto:editorial.bmjopen@bmj.com)

# BMJ Open

## Generalized anxiety disorder and health service use: findings from a large, population study

|                                 |                                                                                                                                                                                                                                                                                                                                                                                                                                                                                                       |
|---------------------------------|-------------------------------------------------------------------------------------------------------------------------------------------------------------------------------------------------------------------------------------------------------------------------------------------------------------------------------------------------------------------------------------------------------------------------------------------------------------------------------------------------------|
| Journal:                        | <i>BMJ Open</i>                                                                                                                                                                                                                                                                                                                                                                                                                                                                                       |
| Manuscript ID                   | bmjopen-2017-018539                                                                                                                                                                                                                                                                                                                                                                                                                                                                                   |
| Article Type:                   | Research                                                                                                                                                                                                                                                                                                                                                                                                                                                                                              |
| Date Submitted by the Author:   | 05-Jul-2017                                                                                                                                                                                                                                                                                                                                                                                                                                                                                           |
| Complete List of Authors:       | Remes, Olivia; University of Cambridge, Public Health and Primary Care<br>Wainwright, Nicholas; University of Cambridge, UK, Public Health and Primary Care (retired)<br>Surtees, Paul; University of Cambridge, Department of Public Health and Primary Care<br>LaFortune, Louise; University of Cambridge, Institute of Public Health<br>Khaw, Kay-Tee; University of Cambridge, Department of Public Health and Primary Care<br>Brayne, Carol; University of Cambridge, Institute of Public Health |
| <b>Primary Subject Heading</b>: | Mental health                                                                                                                                                                                                                                                                                                                                                                                                                                                                                         |
| Secondary Subject Heading:      | Health services research, Public health                                                                                                                                                                                                                                                                                                                                                                                                                                                               |
| Keywords:                       | EPIDEMIOLOGY, MENTAL HEALTH, PUBLIC HEALTH                                                                                                                                                                                                                                                                                                                                                                                                                                                            |
|                                 |                                                                                                                                                                                                                                                                                                                                                                                                                                                                                                       |

SCHOLARONE™  
Manuscripts

1  
2  
3  
4  
5  
6  
7  
8  
9  
10  
11  
12  
13  
14  
15  
16  
17  
18  
19  
20  
21  
22  
23  
24  
25  
26  
27  
28  
29  
30  
31  
32  
33  
34  
35  
36  
37  
38  
39  
40  
41  
42  
43  
44  
45  
46  
47  
48  
49  
50  
51  
52  
53  
54  
55  
56  
57  
58  
59  
60

1  
2  
3  
4  
5  
6  
7  
8  
9  
10  
11  
12  
13  
14  
15  
16  
17  
18  
19  
20  
21  
22  
23  
24  
25  
26  
27  
28  
29  
30

**Generalized anxiety disorder and health service use: findings from a large, population study**

Olivia Remes<sup>1</sup>, Nick Wainwright<sup>2</sup>, Paul Surtees<sup>1</sup>, Louise Lafortune<sup>1</sup>, Kay-Tee Khaw<sup>3</sup>, Carol Brayne<sup>1</sup>

<sup>1</sup>Department of Public Health and Primary Care, University of Cambridge, Forvie Site, Robinson Way, Cambridge, UK CB2 0SR

<sup>2</sup>(Retired) Department of Public Health and Primary Care, University of Cambridge, 2 Worts' Causeway, Cambridge, UK CB1 8RN

<sup>3</sup>Department of Public Health and Primary Care, University of Cambridge, 2 Worts' Causeway, Cambridge, UK CB1 8RN

Figures: 1; Tables: 3; Word count: 3783

Correspondence to: Olivia Remes [or260@medschl.cam.ac.uk](mailto:or260@medschl.cam.ac.uk), telephone: 07776740550

1  
2  
3 31 **ABSTRACT**  
4 32

5 33  
6 34 **OBJECTIVE**

7 35 Generalized anxiety disorder is the most common anxiety disorder in the general  
8 36 population, and has been associated with high economic and human burden. However, it  
9 37 has been neglected in the health services literature, with the exception of some studies  
10 38 showing that it contributes to higher use of primary care services. The objective of this  
11 39 study will be to assess whether generalized anxiety disorder leads to hospital admissions  
12 40 using data from the European Prospective Investigation of Cancer-Norfolk.  
13 41

14 42 **DESIGN**

15 43 Large, population study.  
16 44

17 45 **SETTING**

18 46 UK population-based cohort.  
19 47

20 48 **PARTICIPANTS**

21 49 30,445 people over the age of 40 were recruited through general practice registers in  
22 50 England. Of these, 21,000 completed a structured health and lifestyle questionnaire used to  
23 51 assess generalised anxiety disorder. Anxiety was examined in 1996-2000, and health service  
24 52 use was captured between 1999/00 and 2009 through record linkage with large,  
25 53 administrative health databases. 18,076 participants had complete data on covariates.  
26 54

27 55 **MAIN OUTCOME MEASURE**

28 56 Past-year generalised anxiety disorder defined according to the Diagnostic and Statistical  
29 57 Manual of Mental Disorders, fourth edition.  
30 58

31 59 **RESULTS**

32 60 In this study, 2.2% (397/18,076) respondents had generalised anxiety disorder. Anxiety was  
33 61 not independently associated with hospital admissions (IRR=1.01, 95% CI: 0.87, 1.16) over  
34 62 nine years. However, those who developed anxiety before 30 years of age were at high risk  
35 63 for hospital service use (IRR=1.24, 95% CI: 1.02, 1.50).  
36 64

37 65 **CONCLUSION**

38 66 People with an earlier age of onset for generalized anxiety disorder had a higher risk for  
39 67 hospital admissions over 9 years between 1999/00 and 2009 in the European Prospective  
40 68 Investigation of Cancer-Norfolk study. Altogether, our findings show that anxiety that  
41 69 developed early in life may be of a more severe form, and is associated with high health  
42 70 service use rates. People with early-onset anxiety might be in poorer health than others;  
43 71 clinicians should thus consider taking psychiatric histories of patients presenting with  
44 72 anxiety complaints.  
45 73

46 74 Key words: Anxiety, anxiety disorders, health services  
47 75

76 **ARTICLE SUMMARY**77 **Strengths and limitations of this study**

- 78 • We used a large, population-based sample of middle- and older-aged adults and  
79 adjusted for a range of important confounders, such as, sociodemographic factors  
80 and medical history.  
81
- 82 • We used a structured, self-reported questionnaire to assess presence of past-year  
83 GAD, and participants were followed for 9 years.  
84
- 85 • We examined health services through record linkage with large, administrative  
86 health databases.  
87
- 88 • Those who participated in this study were somewhat less deprived and healthier  
89 than individuals living in other parts of England; therefore, our results may not  
90 generalize to people living in extremely deprived circumstances.  
91  
92

## INTRODUCTION

93  
94  
95 Anxiety disorders[1] are the most common class of psychiatric disorders in the general  
96 population. The Global Burden of Disease study[2] estimated that anxiety disorders  
97 contribute to 26.8 million disability adjusted life years, and their annual direct cost is \$42.3  
98 billion[3]. Generalized anxiety disorder (GAD) is a prevalent and disabling condition in  
99 adults, and can lead to serious impairment in social and occupational functioning.[4] It is  
100 associated with poor quality of life, impaired functioning and risk of suicide.[5-8] Across the  
101 anxiety disorders, GAD has been found to be the most debilitating.[5, 9] Although there is  
102 effective treatment for GAD, only a third of those affected receive any treatment.[8] This is  
103 because anxiety disorders are frequently under-recognized and mismanaged by clinicians in  
104 primary care, which is often the first point of contact for those with mental health problems.

105  
106 Previous literature has suggested that patients with mental health problems tend to present  
107 to their physician with physical rather than psychiatric symptoms, which leads to the  
108 administration of extensive and costly medical tests in the search for a physical cause. This  
109 implies that the problem has no physical basis (it is purely psychiatric in nature), and that  
110 the patient, failing to recognize this, continues frequenting the general medical setting until  
111 the underlying problem has been resolved.[9] Studies reiterate that effective treatment for  
112 anxiety exists, but because physicians fail to recognize the origin of the patient's complaints  
113 as psychiatric rather than physical, patients are not given the anxiolytic medication or  
114 psychotherapy needed, hindering their recovery. However, it might be that anxiety  
115 represents more than just worry-related symptoms that cannot be simply resolved through  
116 psychological therapies or psychotropic medication. Anxiety disorders could be masking  
117 underlying poor health or could be an early warning signal for future health problems that  
118 are not yet detectable by standard medical tests.

119  
120 Anxiety has been linked to hypothalamic-pituitary-adrenal (HPA)-axis dysregulation,  
121 inflammation, and the release of pro-inflammatory cytokines, and this can lead to poor  
122 health.[9] A recent study of hospitalized patients[10] also showed that people with anxiety  
123 disorders had more physical comorbidities, including cardiovascular diseases and their risk  
124 factors, compared to people without anxiety disorders.

1  
2  
3 125 Early or late-onset forms of anxiety disorders should be also considered. A study[11] of over  
4 126 one million Swedish men followed for over 20 years showed that early-onset forms of  
5 127 mental disorders in particular led to increased risk of incident CHD. Therefore, identifying  
6 128 clinical aspects, such as, individual anxiety disorders, early or late onset forms of the  
7 129 disorder, and episode chronicity and frequency, can lead to better clinical management and  
8 130 more accurate prediction of future disability and health service use.[12]  
9  
10  
11  
12

13  
14 131  
15 132 The evidence base on health service use and anxiety is small and limited, and most of the  
16 133 recent studies have focussed on post-traumatic stress disorder (PTSD) in war veterans.[13,  
17 134 14] Most studies are based on clinical populations, cross-sectional designs, small samples,  
18 135 short follow-up periods (usually one year), do not adequately control for confounders, and  
19 136 use self-report to assess frequency or other measures of hospitalization patterns in the  
20 137 clinical setting.  
21  
22  
23  
24  
25  
26  
27

28 138  
29 139 Generalized anxiety disorder (GAD) is one of the most common anxiety disorders in the  
30 140 general population[15] and the primary care setting[16], and has been associated with high  
31 141 economic and human burden. However, it has been neglected in the health services  
32 142 literature, with the exception of some studies showing GAD to contribute to higher use of  
33 143 primary care services in primary care samples.[17-20] Whether GAD leads to hospital  
34 144 admissions is unknown.  
35  
36  
37  
38  
39

40 145  
41 146 The objective of this study will be to assess the association between generalized anxiety  
42 147 disorder (GAD) and hospital service use in a longitudinal, population cohort of over 18,000  
43 148 British individuals followed for 10 years. The aim is also to determine whether early or late  
44 149 onset forms of the disorder, episode frequency and chronicity contribute to higher rates of  
45 150 hospital services.  
46  
47  
48  
49  
50  
51  
52  
53  
54  
55  
56  
57  
58  
59  
60

## METHODS

### Study population

The study population was drawn from the European Prospective Investigation of Cancer-Norfolk longitudinal, cohort study, described in detail elsewhere.[21, 22] Briefly, a total of 30,445 participants over the age of 40 living in Norwich and the surrounding towns and rural areas were recruited between 1993 and 1997 using general practice registers. At baseline, they completed a health questionnaire capturing sociodemographics and medical history, and underwent a health check that gathered information on medication use. During follow-up, between 1993 and 1999/2000, participants completed self-reported postal questionnaires provided they: 1) were still alive, 2) did not ask to be removed from the study's mailing list, and 3) had a valid mailing address. Between 1996 and 1999/2000, respondents completed a Health and Life Experiences Questionnaire (HLEQ) used to capture information on psychiatric disorders, other psychosocial factors, and risk behaviours. Record linkage with administrative health databases using a unique identifier was used to determine hospitalization admissions data until 2009.

All participants recruited through general-practice registers and who completed a baseline health questionnaire were eligible to be included in our study; those who completed a psychosocial questionnaire during follow-up were eligible to be included in our analysis.

### Assessment of generalized anxiety disorder (GAD)

The HLEQ was used to derive a measure of GAD according to the Diagnostic and Statistical Manual of Mental Disorders, fourth edition. The HLEQ captured the onset and offset timings of episodes of past-year GAD.[23] Past-year GAD consisted of at least one episode that had offset within 12 months of administration of the HLEQ. DSM-IV GAD was diagnosed if participants reported having uncontrollable, excessive worry for six months or longer on most days than not that resulted in disability or impairment. In addition, at least three of the following symptoms needed to have been present: restlessness, irritability, muscle



1  
2  
3 184 tension, fatigue, trouble concentrating because of worry, mind going blank, trouble falling  
4  
5 185 asleep, trouble staying asleep, and feeling keyed up or on edge.  
6  
7 186

8 187 **Assessment of covariates (potential confounders)**  
9

10 188  
11 189 Potential confounders (based on the literature) included sociodemographics (age, sex,  
12 190 education, marital status, social class, employment), prevalent physical diseases, MDD,  
13 191 psychotropic medication use (antihypnotics and antidepressants), and risk behaviours  
14 192 (alcohol use, smoking, physical activity). The final categorization of the variables took cell  
15 193 size into account and was also done in accordance with previous literature.[23, 24-29] Age  
16 194 was first assessed as a categorical variable, and subsequently divided into 10-year bands.  
17 195 Sex was categorized into male vs. female; marital status was categorized into: married,  
18 196 single (or never married), and others (widowed, divorced, separated); educational  
19 197 attainment into high (vocational or formal qualifications at the A- or O-level or degree-level  
20 198 qualifications) vs. low (no formal qualifications). Social class was derived using the  
21 199 Computer-Assisted Standard Occupational Coding[29] and categorized as follows: I  
22 200 (professionals), II (managerial and technical occupations), III non-manual and III manual  
23 201 (skilled workers), IV (partly skilled workers), and V (unskilled manual workers). To assign  
24 202 social class to men and women, the male partner's current or past occupation was used. If  
25 203 this information was not available, the female partner's occupation was used. If the social  
26 204 class from either partner was unavailable, then it was coded as missing. The final  
27 205 categorization of social class included manual: skilled manual, partly skilled, and unskilled;  
28 206 and non-manual: professionals, managerial and technical, and skilled non-manual. Marital  
29 207 status was categorized into three groups: married, single (or never married), and others  
30 208 (widowed, divorced, separated). Employment was divided into yes vs. no. Behaviour risk  
31 209 factor measures included alcohol intake (units of alcohol/week), smoking status (current,  
32 210 former, non-smoker), and physical activity (inactive, moderately inactive, moderately active,  
33 211 active). Use of medications included hypnotic drug use (yes/no) and antidepressant drug  
34 212 use (yes/no). Presence of past-year DSM-IV major depressive disorder (MDD) (yes/no) was  
35 213 also assessed.[30]  
36  
37  
38  
39  
40  
41  
42  
43  
44  
45  
46  
47  
48  
49  
50  
51  
52  
53  
54  
55  
56  
57  
58  
59  
60

1  
2  
3 215 Individual-level health status was assessed through the construction of a variable capturing  
4 216 major prevalent physical diseases associated with anxiety.[31] This was based on HLQ  
5 217 questions asking participants: “Has the doctor ever told you that you have any of the  
6 218 following?”, followed by a list of options, such as stroke, myocardial infarction, and cancer.  
7  
8 219 To determine disability levels, we used the physical component summary score (PCS) of the  
9 220 Medical Outcomes Study 36-Item Short Form (SF-36), a widely-used, validated self-  
10 221 assessment tool. A score of 100 represents no disability and 0 represents a high level of  
11 222 disability.[32] PCS scores were dichotomized above and below the median.  
12  
13  
14  
15  
16  
17  
18

19 224 All of these individual-level variables were regarded as potential confounders and selected  
20 225 based on the literature and their association with anxiety and deprivation.[33, 34]  
21  
22  
23

#### 24 227 **Hospital service use**

25  
26  
27  
28 229 All analyses are based on non-psychiatric hospitalizations. Primary care service use was not  
29 230 captured in this study.  
30  
31

32  
33 232 Frequency of hospitalization between 1999/00 and 2009 was determined using  
34 233 administrative health databases maintained by the National Health Service. The East  
35 234 Norfolk Primary Health Care trust databases were used, and these are updated on an  
36 235 ongoing basis and provide information on clinical and administrative data from participating  
37 236 facilities, such as, hospitals.  
38  
39  
40  
41

42 237  
43 238 England is under a publicly-funded health care system (the National Health Service), free at  
44 239 the point of delivery; therefore, we expect factors, such as access to health insurance or  
45 240 personal income, to have minimal impact on the care that is obtained by study participants.  
46 241 The databases used in this study are maintained by the National Health Service, which is  
47 242 likely to capture most hospital admissions from the population, as private sector provision is  
48 243 minimal. This means that admissions data in our study can be considered complete for the  
49 244 ascertainment of hospital/health service use, and the likelihood of bias minimal. To access  
50 245 hospital services in the UK, a referral is needed from the primary care practitioner, who acts  
51 246 as a gate-keeper to secondary care.  
52  
53  
54  
55  
56  
57  
58  
59  
60

1  
2  
3 247 The East Norfolk Primary Health Care databases were linked to the EPIC-Norfolk cohort  
4 248 using participants' unique National Health Service number, which allows complete record  
5 249 linkage across settings and calendar time.  
6  
7

8 250  
9

10 251 Vital status for participants was determined through record linkage with the United  
11 252 Kingdom Office of National Statistics. Vital status was available for all participants. This  
12 253 allowed us to exclude those who died before their health service use was ascertained.  
13  
14

15 254

### 16 255 **Statistical Analysis**

17 256  
18

19 257 First, demographics, social class, medical and psychiatric co-morbidities, risk behaviours,  
20 258 and medication use were compared by GAD status. Second, frequency of hospitalization  
21 259 was compared by GAD status.  
22  
23  
24

25 260  
26

27 261 Since the number of hospital admissions was skewed and the variance was much larger than  
28 262 the mean, zero-inflated negative binomial regression was used for frequency of hospital  
29 263 utilization (number of hospital admissions). The log-likelihood test showed that this model  
30 264 was superior to Poisson regression. Three models were fitted for hospital admissions with  
31 265 progressive adjustment of covariates: model A adjusted for sociodemographics (age, sex,  
32 266 education, social class, employment), physical comorbidities and disability; model B further  
33 267 accounted for past-year MDD (assessed at the same questionnaire point as past-year GAD);  
34 268 and model C further controlled for antihypnotic and antidepressant medications, physical  
35 269 activity, alcohol, and smoking.  
36  
37  
38  
39  
40  
41  
42

43 270  
44

45 271 Finally, we determined whether the risk for hospitalization was higher among those with: 1)  
46 272 3 or more episodes of lifetime GAD (versus fewer than 3 episodes), 2) age of onset at 30  
47 273 years or younger (versus over 30 years), and 3) episodes that lasted on average 6 months or  
48 274 more (versus fewer than 6 months). Two-sided statistical tests were conducted and a p-  
49 275 value of <0.05 was used for statistical significance. Analyses were implemented in SAS,  
50 276 version 9.3.  
51  
52  
53  
54

55 277  
56  
57  
58  
59  
60

1  
2  
3 278 To arrive at the study size, we went through the following steps: of the 30,445 who  
4  
5 279 completed the baseline HLQ, we retained those participants who completed the HLEQ  
6  
7 280 (20,921), and of these, we kept those people with complete data on all covariates (18,076).  
8  
9 281 (Figure 1)

10 282

11  
12 283 **Patient involvement**

13  
14 284

15  
16 285 There were no patients involved in the development of the research question and outcome  
17  
18 286 measures, the design of the study, or the recruitment to and conduct of the study.

19  
20 287  
21  
22  
23  
24  
25  
26  
27  
28  
29  
30  
31  
32  
33  
34  
35  
36  
37  
38  
39  
40  
41  
42  
43  
44  
45  
46  
47  
48  
49  
50  
51  
52  
53  
54  
55  
56  
57  
58  
59  
60

**RESULTS**

288

289

290 Of the 30,445 people recruited at baseline, 20,921 participants completed the HLEQ; we had  
291 479 missing observations for past-year GAD, 700 for past-year MDD, 1386 for SF-36, and the  
292 rest of the missing observations (280) were generated from the other covariates. The final  
293 sample included a total of 18,076 participants. Participants were assessed between  
294 1999/00 and 2009 (followed for 9 years) (Figure 1).

295

296 In 1996-2000, GAD was present in 397 out of 18,076 (2.2%) people. Table 1 shows the  
297 baseline characteristics of participants by GAD status.

298

299 **Table 1 Percentage and number of people with past-year GAD reported in 1996-2000**  
 300 **according to sociodemographic factors, health status, and behaviour risk factors for the**  
 301 **EPIC-Norfolk cohort (n=18,076)**  
 302

| Characteristic                            | Number with characteristic | Percentage and number with past-year GAD |
|-------------------------------------------|----------------------------|------------------------------------------|
| <b>Socio-demographics</b>                 |                            |                                          |
| <b>Age (years)</b>                        |                            |                                          |
| <50                                       | 2369                       | 3.4 (81)                                 |
| 50-60                                     | 6242                       | 2.9 (180)                                |
| 60-70                                     | 5782                       | 1.6 (94)                                 |
| 70+                                       | 3683                       | 1.1 (42)                                 |
| <b>Sex</b>                                |                            |                                          |
| Women                                     | 10037                      | 2.5 (252)                                |
| Men                                       | 8039                       | 1.8 (145)                                |
| <b>Education<sup>‡</sup></b>              |                            |                                          |
| Low                                       | 6189                       | 2.0 (122)                                |
| High                                      | 11887                      | 2.3 (275)                                |
| <b>Marital status</b>                     |                            |                                          |
| Single                                    | 690                        | 3.6 (25)                                 |
| Married                                   | 14640                      | 2.0 (287)                                |
| Other*                                    | 2746                       | 3.1 (85)                                 |
| <b>Social class</b>                       |                            |                                          |
| Manual                                    | 6910                       | 2.0 (139)                                |
| Non-manual                                | 11166                      | 2.3 (258)                                |
| <b>Employment</b>                         |                            |                                          |
| Yes                                       | 7742                       | 2.0 (156)                                |
| No                                        | 10334                      | 2.3 (241)                                |
| <b>Health status</b>                      |                            |                                          |
| <b>Physical comorbidities<sup>+</sup></b> |                            |                                          |
| Yes                                       | 9237                       | 2.7 (253)                                |
| No                                        | 8839                       | 1.6 (144)                                |
| <b>Disability level</b>                   |                            |                                          |
| High <sup>¶</sup>                         | 8989                       | 3.0 (270)                                |
| Low                                       | 9087                       | 1.4 (127)                                |
| <b>Psychiatric comorbidity</b>            |                            |                                          |
| <b>Past-year MDD</b>                      |                            |                                          |
| Yes                                       | 941                        | 21.6 (203)                               |
| No                                        | 17135                      | 1.1 (194)                                |
| <b>Lifestyle</b>                          |                            |                                          |
| <b>Physical activity</b>                  |                            |                                          |
| Active <sup>‡</sup>                       | 12882                      | 2.1 (272)                                |
| Inactive                                  | 5194                       | 2.4 (125)                                |
| <b>Smoking status</b>                     |                            |                                          |
| Current smoker                            | 1907                       | 4.8 (92)                                 |
| Former smoker                             | 7510                       | 1.9 (141)                                |
| Never smoker                              | 8659                       | 1.9 (164)                                |
| <b>Alcohol intake</b>                     |                            |                                          |
| High <sup>¶</sup>                         | 9242                       | 2.0 (183)                                |

|                           |       |           |     |
|---------------------------|-------|-----------|-----|
| Low                       | 8834  | 2.4 (214) | 303 |
| <b>Medication</b>         |       |           |     |
| <b>Antidepressant use</b> |       |           |     |
| Yes                       | 632   | 15.4 (97) | 306 |
| No                        | 17444 | 1.7 (300) | 307 |
| <b>Antihypnotic use</b>   |       |           |     |
| Yes                       | 2799  | 2.4 (68)  | 308 |
| No                        | 15277 | 2.2 (329) | 309 |

310 + Prevalent physical disease: respiratory disease (asthma and bronchitis), allergies and hay fever, stroke, heart  
 311 attack, cancer, diabetes, thyroid conditions, arthritis

312 ‡ Moderately inactive, moderately active, active

313 † High education: O-level, A-level, degree; low education: refers to no education

314 \* Other: divorced, separated, widowed

315 ¶ Below the median PCS value of 50.6

316 <sup>a</sup> 3+ units of alc./week (1 pint beer=2 units, 1 glass wine=1 unit, 1 glass sherry=1 unit, 1 glass spirits=1 unit)

peer review only

1  
2  
3 317 Those with GAD were more likely to be younger, women, inactive, current smokers, low  
4 318 alcohol consumers, of higher educational attainment, single, non-manual social class,  
5 319 without employment, with physical comorbidities, high levels of disability, MDD, and to take  
6 320 antidepressant and antihypnotic medications. Table 2 summarizes the means and standard  
7 321 deviations of the number of hospital admissions by participant characteristics.  
8  
9 322  
10  
11  
12  
13  
14  
15  
16  
17  
18  
19  
20  
21  
22  
23  
24  
25  
26  
27  
28  
29  
30  
31  
32  
33  
34  
35  
36  
37  
38  
39  
40  
41  
42  
43  
44  
45  
46  
47  
48  
49  
50  
51  
52  
53  
54  
55  
56  
57  
58  
59  
60



323 **Table 2: Hospital admissions (mean, SD) by participant characteristics in 18,076 British**  
 324 **people between 1999/00 and 2009**  
 325

| Characteristic                            | Total number with characteristic | Number of admissions<br>Mean (SD) |
|-------------------------------------------|----------------------------------|-----------------------------------|
| <b>Past-year GAD</b>                      |                                  |                                   |
| Yes                                       | 397                              | 4.1 (6.3)                         |
| No                                        | 17679                            | 3.4 (13.0)                        |
| <b>Socio-demographics</b>                 |                                  |                                   |
| <b>Age (years)</b>                        |                                  |                                   |
| <50                                       | 2369                             | 1.9 (9.8)                         |
| 50-60                                     | 6242                             | 3.0 (16.4)                        |
| 60-70                                     | 5782                             | 3.8 (11.1)                        |
| 70+                                       | 3683                             | 4.6 (9.6)                         |
| <b>Sex</b>                                |                                  |                                   |
| Women                                     | 10037                            | 3.1 (14.0)                        |
| Men                                       | 8039                             | 3.9 (11.3)                        |
| <b>Education<sup>†</sup></b>              |                                  |                                   |
| Low                                       | 6189                             | 4.1 (17.0)                        |
| High                                      | 11887                            | 3.1 (10.0)                        |
| <b>Marital status</b>                     |                                  |                                   |
| Single                                    | 690                              | 3.0 (8.9)                         |
| Married                                   | 14640                            | 3.4 (10.9)                        |
| Other*                                    | 2746                             | 4.0 (20.9)                        |
| <b>Social class</b>                       |                                  |                                   |
| Manual                                    | 6910                             | 4.0 (18.2)                        |
| Non-manual                                | 11166                            | 3.1 (7.9)                         |
| <b>Employment</b>                         |                                  |                                   |
| Yes                                       | 7742                             | 2.5 (9.1)                         |
| No                                        | 10334                            | 4.1 (15.0)                        |
| <b>Health status</b>                      |                                  |                                   |
| <b>Physical comorbidities<sup>‡</sup></b> |                                  |                                   |
| Yes                                       | 9237                             | 3.9 (10.4)                        |
| No                                        | 8839                             | 3.0 (15.0)                        |
| <b>Disability level</b>                   |                                  |                                   |
| High <sup>¶</sup>                         | 8989                             | 4.4 (16.4)                        |
| Low                                       | 9087                             | 2.5 (7.8)                         |
| <b>Psychiatric comorbidity</b>            |                                  |                                   |
| <b>Past-year MDD</b>                      |                                  |                                   |
| Yes                                       | 941                              | 4.6 (13.6)                        |
| No                                        | 17135                            | 3.4 (12.8)                        |
| <b>Lifestyle</b>                          |                                  |                                   |
| <b>Physical activity</b>                  |                                  |                                   |
| Active <sup>‡</sup>                       | 12882                            | 3.2 (13.3)                        |
| Inactive                                  | 5194                             | 4.1 (11.6)                        |
| <b>Smoking status</b>                     |                                  |                                   |
| Current smoker                            | 1907                             | 4.6 (26.7)                        |

|                           |       |            |     |
|---------------------------|-------|------------|-----|
| Former smoker             | 7510  | 3.8 (11.4) | 326 |
| Never smoker              | 8659  | 2.9 (8.9)  |     |
| <b>Alcohol intake</b>     |       |            |     |
| High <sup>a</sup>         | 9242  | 3.2 (13.3) |     |
| Low                       | 8834  | 3.7 (12.4) |     |
| <b>Medication</b>         |       |            |     |
| <b>Antidepressant use</b> |       |            |     |
| Yes                       | 632   | 5.2 (19.8) |     |
| No                        | 17444 | 3.4 (12.5) |     |
| <b>Antihypnotic use</b>   |       |            |     |
| Yes                       | 2799  | 5.2 (23.6) |     |
| No                        | 15277 | 3.1 (9.6)  |     |

327

328

329

330

331

332

333

334

335

\* Prevalent physical disease: respiratory disease (asthma and bronchitis), allergies and hay fever, stroke, heart attack, cancer, diabetes, thyroid conditions, arthritis

‡ Moderately inactive, moderately active, active

‡ High education: O-level, A-level, degree; low education: refers to no education

\* Other: divorced, separated, widowed

<sup>¶</sup> Below the median PCS value of 50.6

<sup>a</sup> 3+ units of alc./week (1 pint beer=2 units, 1 glass wine=1 unit, 1 glass sherry=1 unit, 1 glass spirits=1 unit)

1  
2  
3 336 Participants with GAD had a higher frequency of hospitalization compared to those without  
4 337 GAD. Some of the findings show that frequency of hospitalization was markedly higher  
5 338 among older age groups, men, those with low educational attainment, unemployed  
6 339 participants, those with high levels of disability, past-year MDD and individuals taking  
7 340 medication.  
8  
9

10  
11 341

12 342 Table 3 shows the unadjusted and adjusted incidence rate ratios of hospital admissions by  
13 343 GAD status.  
14  
15  
16  
17  
18  
19  
20  
21  
22  
23  
24  
25  
26  
27  
28  
29  
30  
31  
32  
33  
34  
35  
36  
37  
38  
39  
40  
41  
42  
43  
44  
45  
46  
47  
48  
49  
50  
51  
52  
53  
54  
55  
56  
57  
58  
59  
60

345 **Table 3: Associations between past-year GAD reported in 1996-2000 and hospital**  
 346 **admissions in 1999/00-2009 in 18,076 British people over the age of 40**  
 347

| IRR and 95% CI                            |                   |                   |                   |                   |
|-------------------------------------------|-------------------|-------------------|-------------------|-------------------|
| Characteristic                            | Crude IRR         | A <sup>1</sup>    | B <sup>2</sup>    | C <sup>3</sup>    |
| <b>Past-year GAD</b>                      |                   |                   |                   |                   |
| Yes                                       | 1.19 (1.03, 1.37) | 1.26 (1.10, 1.45) | 1.11 (0.96, 1.28) | 1.01 (0.87, 1.16) |
| No                                        | 1.00              | 1.00              | 1.00              | 1.00              |
| <b>Socio-demographics</b>                 |                   |                   |                   |                   |
| <b>Age</b>                                |                   |                   |                   |                   |
| Per 10 years                              | 1.36 (1.33, 1.39) | 1.19 (1.16, 1.23) | 1.20 (1.17, 1.24) | 1.20 (1.16, 1.24) |
| <b>Sex</b>                                |                   |                   |                   |                   |
| Women                                     | 0.80 (0.77, 0.83) | 0.76 (0.73, 0.79) | 0.76 (0.72, 0.79) | 0.77 (0.73, 0.80) |
| Men                                       | 1.00              | 1.00              | 1.00              | 1.00              |
| <b>Education<sup>‡</sup></b>              |                   |                   |                   |                   |
| Low                                       | 1.30 (1.25, 1.36) | 1.13 (1.08, 1.18) | 1.14 (1.09, 1.19) | 1.12 (1.07, 1.17) |
| High                                      | 1.00              | 1.00              | 1.00              | 1.00              |
| <b>Marital status</b>                     |                   |                   |                   |                   |
| Single                                    | 0.88 (0.79, 0.99) | 0.85 (0.77, 0.95) | 0.85 (0.76, 0.94) | 0.84 (0.75, 0.93) |
| Married                                   | 1.00              | 1.00              | 1.00              | 1.00              |
| Other*                                    | 1.21 (1.14, 1.28) | 1.17 (1.10, 1.24) | 1.14 (1.07, 1.20) | 1.08 (1.02, 1.14) |
| <b>Social class</b>                       |                   |                   |                   |                   |
| Manual                                    | 1.29 (1.24, 1.35) | 1.25 (1.19, 1.30) | 1.25 (1.19, 1.30) | 1.19 (1.14, 1.25) |
| Non-manual                                | 1.00              | 1.00              | 1.00              | 1.00              |
| <b>Employment</b>                         |                   |                   |                   |                   |
| Yes                                       | 1.00              | 1.00              | 1.00              | 1.00              |
| No                                        | 1.63 (1.57, 1.70) | 1.18 (1.12, 1.25) | 1.17 (1.11, 1.24) | 1.13 (1.08, 1.20) |
| <b>Health status</b>                      |                   |                   |                   |                   |
| <b>Physical comorbidities<sup>+</sup></b> |                   |                   |                   |                   |
| Yes                                       | 1.32 (1.27, 1.38) | 1.18 (1.13, 1.23) | 1.17 (1.13, 1.23) | 1.17 (1.12, 1.22) |
| No                                        | 1.00              | 1.00              | 1.00              | 1.00              |
| <b>Disability level</b>                   |                   |                   |                   |                   |
| High <sup>¶</sup>                         | 1.78 (1.71, 1.85) | 1.51 (1.45, 1.58) | 1.51 (1.44, 1.57) | 1.43 (1.37, 1.50) |
| Low                                       | 1.00              | 1.00              | 1.00              | 1.00              |
| <b>Psychiatric comorbidity</b>            |                   |                   |                   |                   |
| <b>Past-year MDD</b>                      |                   |                   |                   |                   |
| Yes                                       | 1.35 (1.23, 1.48) |                   | 1.34 (1.22, 1.48) | 1.29 (1.18, 1.42) |
| No                                        | 1.00              |                   | 1.00              | 1.00              |
| <b>Medications</b>                        |                   |                   |                   |                   |
| <b>Antihypnotic use</b>                   |                   |                   |                   |                   |
| Yes                                       | 1.67 (1.58, 1.77) |                   |                   | 1.28 (1.21, 1.35) |
| No                                        | 1.00              |                   |                   | 1.00              |
| <b>Antidepressant use</b>                 |                   |                   |                   |                   |
| Yes                                       | 1.54 (1.38, 1.72) |                   |                   | 1.27 (1.14, 1.42) |

|                          |                   |                   |
|--------------------------|-------------------|-------------------|
| No                       | 1.00              | 1.00              |
| <b>Lifestyle</b>         |                   |                   |
| <b>Physical activity</b> |                   |                   |
| Active <sup>‡</sup>      | 1.00              | 1.00              |
| Inactive                 | 1.27 (1.21, 1.33) | 1.04 (0.99, 1.08) |
| <b>Smoking status</b>    |                   |                   |
| Current smoker           | 1.59 (1.48, 1.71) | 1.47 (1.37, 1.57) |
| Former smoker            | 1.32 (1.26, 1.38) | 1.12 (1.07, 1.17) |
| Never smoker             | 1.00              | 1.00              |
| <b>Alcohol intake</b>    |                   |                   |
| High <sup>¶</sup>        | 0.88 (0.85, 0.92) | 0.92 (0.88, 0.96) |
| Low                      | 1.00              | 1.00              |

348

349 <sup>1</sup> Model A: adjusted for age, sex, education, marital status, social class, employment, physical comorbidities350 <sup>2</sup> Model B: adjusted for sociodemographics, physical comorbidities, MDD351 <sup>3</sup> Model C: adjusted for sociodemographics, physical comorbidities, MDD, antihypnotic use, antidepressant  
352 use, physical activity, smoking, alcohol353 <sup>\*</sup> Physical co-morbidities: respiratory disease (asthma and bronchitis), allergies and hay fever, stroke, heart  
354 attack, cancer, diabetes, thyroid conditions, arthritis355 <sup>‡</sup> Moderately inactive, moderately active, active356 <sup>‡</sup> High education: O-level, A-level, degree; low education: refers to no education357 <sup>\*</sup> Other: divorced, separated, widowed358 <sup>¶</sup> Below the median PCS value of 50.6359 <sup>¶</sup> 3+ units of alc./week (1 pint beer=2 units, 1 glass wine=1 unit, 1 glass sherry=1 unit, 1 glass spirits=1 unit)

1  
2  
3 360 After adjustment for sociodemographic variables, physical comorbidities, and disability, GAD  
4 361 was associated with a 26% higher incidence rate of hospitalization (IRR=1.26, 95% CI: 1.10,  
5 362 1.45). The incidence rate ratio was somewhat attenuated and became statistically non-  
6 363 significant after further adjustment for MDD (IRR=1.11, 95% CI 0.96, 1.28). The effect  
7 364 estimate approached the null after further adjustment for medication use and lifestyle  
8 365 factors (IRR=1.01, 95% CI: 0.87, 1.16).  
9 366

10 367 Next, we assessed whether risk for hospital admissions varied by frequency of lifetime  
11 368 episodes, age of onset, and episode chronicity. People who developed GAD before 30 years  
12 369 of age were 24% more likely to be admitted to the hospital than those who developed it  
13 370 later in life (IRR=1.24, 95% CI: 1.02, 1.50). People with more than 3 lifetime episodes also  
14 371 had a higher risk of hospitalizations, but the association did not reach statistical significance  
15 372 (IRR=1.15, 95% CI: 0.98, 1.35). Those whose episodes lasted, on average, 6 months or  
16 373 longer did not have an increased risk for admissions compared to those with shorter  
17 374 episodes (IRR=1.09, 95% CI: 0.87, 1.36).  
18  
19  
20  
21  
22  
23  
24  
25  
26  
27  
28  
29  
30  
31  
32  
33  
34  
35  
36  
37  
38  
39  
40  
41  
42  
43  
44  
45  
46  
47  
48  
49  
50  
51  
52  
53  
54  
55  
56  
57  
58  
59  
60

**DISCUSSION**

375  
376  
377 This is the first study to assess the association between generalized anxiety disorder (GAD)  
378 and hospital service use in a population-based cohort. This longitudinal study showed that  
379 having an episode of GAD in the past year was not independently associated with hospital  
380 admissions during the subsequent ten years. However, those who developed GAD at an  
381 early age (before 30) were at a significantly increased risk for being admitted to hospital  
382 than those with a later onset.

383  
384 People with past-year GAD were more likely to have medical comorbidities; therefore, the  
385 association with hospital service use was partially driven by worse physical health in those  
386 with anxiety. Psychiatric co-morbidity also led to attenuation of the effect estimate for  
387 those who experienced an episode of GAD in the past year. Major depressive disorder  
388 (MDD) is highly comorbid with GAD, and when it was introduced in the models, it explained  
389 away any remaining associations with hospital service utilization in the primary analyses.

390  
391 When the course of GAD was considered, the risk for hospitalization was found to be much  
392 higher in those who developed anxiety at an early age, after adjusting for physical diseases,  
393 psychiatric comorbidity, and behaviour risk factors.

394

**Strengths and limitations**

396

397 There are several strengths associated with our study. We had a large, population-based  
398 sample of middle- and older-aged adults and adequately adjusted for a range of possible  
399 confounders. We used a structured questionnaire to assess past-year GAD according to  
400 DSM-IV criteria, used large administrative health databases to examine hospital service use  
401 (avoiding the self-reporting bias found in questionnaire studies), and participants were  
402 followed for a long time. We had a large list of self-reported physician diagnoses of chronic  
403 diseases that we used to ascertain medical histories. Despite this, the residual effect of  
404 diseases not captured by our study, but that are associated with GAD may be present. Past  
405 illness may have been underreported, which may have introduced measurement error and  
406 further attenuated effect estimates towards the null. A negligible proportion of participants

1  
2  
3 407 may have obtained care at private facilities, which might have led to non-differential  
4 408 misclassification. The databases used in this study also did not capture admissions to  
5 409 hospitals outside the UK. However, migration in the EPIC-Norfolk cohort is minimal and  
6 410 does not present a problem.  
7  
8  
9

10 411

11 412 We may have overadjusted our models with the inclusion of self-evaluated impairment, as  
12 413 this may be part of the expression of psychiatric illness. This can lead to attenuation of  
13 414 effect estimates. If participants chose not to answer certain questions in the HLEQ, this  
14 415 contributed to missing data; however, to avoid biasing the findings, we retained participants  
15 416 for whom we had complete data on all covariates. Non-participation in our study also may  
16 417 have led to non-differential misclassification and further attenuation of effect estimates.  
17  
18  
19  
20  
21

22 418

23  
24 419 Another limitation is that we did not have data on primary care service use. Merging  
25 420 population cohorts, such as ours, with primary care service administrative databases and  
26 421 hospitalization databases would have provided a more complete picture of the burden of  
27 422 GAD on the health care system.  
28  
29  
30

31 423

32  
33 424 Participants were required to complete detailed dietary and lifestyle questionnaires and  
34 425 undergo periodic health assessments. Because those who participated in EPIC-Norfolk were  
35 426 more affluent and healthier than individuals living in other parts of England, our results may  
36 427 not generalize to people living in extremely deprived areas.  
37  
38  
39

40 428

#### 41 429 **Comparison with other studies**

42 430

43  
44  
45 431 Most of the studies assessing the link between psychiatric disorders and non-psychiatric  
46 432 health service utilization have focused on depression and, to a lesser extent, panic disorder  
47 433 and PTSD, while other anxiety disorders have been significantly underresearched. Most of  
48 434 the studies on depression have shown an association with health service use in both clinical  
49 435 and community samples.[35] There are substantially fewer studies on anxiety, and a  
50 436 number of these have shown positive associations with health service use. A US study[36]  
51 437 that recruited patients from an outpatient clinic showed that anxiety disorders were linked  
52 438 to higher utilization of primary care services compared to depressive or addictive disorders.  
53  
54  
55  
56  
57  
58  
59  
60



1  
2  
3 439 Patients, however, were recruited from an outpatient clinic located in a predominantly rural  
4 440 area, which might have affected generalizability. Another study showed anxiety disorders  
5 441 to be associated with a higher number of consultations in general medical, emergency and  
6 442 specialty settings, such as cardiology and dermatology.[37] In this study, people were  
7 443 sampled from an anxiety clinic, thereby leading to possible selection bias. PTSD has also  
8 444 been associated with health service use, such as more ordered lab tests and medications  
9 445 prescribed compared to those without this disorder, but much of the literature on this[14,  
10 446 38] has been based on highly-select samples that have limited generalizability. Two of the  
11 447 more recent studies on GAD showed it to be associated with health care use. One Canadian  
12 448 study[19] suggested a higher rate of medical visits to primary care practitioners in those  
13 449 with GAD, while a US study[17] also found a higher frequency of specialty medical care visits  
14 450 in affected individuals. Both of these studies recruited clinical samples, with the potential  
15 451 for self-selection bias. None of these studies assessed whether the severity of anxiety  
16 452 contributes to even higher health service use rates (early onset forms of the disorder are  
17 453 typically the most severe, hardest to treat and with the poorest prognosis [9]).  
18  
19  
20  
21  
22  
23  
24  
25  
26  
27  
28  
29  
30

454

### 455 **Mechanisms**

456

457 A more severe course of GAD, marked by early age of onset, can lead to higher rates of  
458 health services because of unhealthy behaviours, such as smoking and alcohol. When we  
459 controlled for these covariates, the associations with hospitalizations remained significant.  
460 It could also be that anxiety is associated with poorer underlying health, which leads to  
461 higher health service use rates. Although we controlled for several chronic diseases, we  
462 might have missed some conditions that are associated with GAD and hospitalizations. A  
463 third explanation for higher health service use in those with anxiety could relate to  
464 inflammatory pathways. If clinically apparent signs of disease have not yet developed in  
465 those with anxiety or are at an early, undetectable stage, it will not be possible to measure  
466 these factors and adjust for them in analyses.

467

1  
2  
3 468 **Implications**  
4  
5 469

6 470 Generalized anxiety disorder is a debilitating and impairing condition.[9] The evidence base  
7 471 on its association with health services is small and confined to clinical settings with the  
8 472 potential for self-selection bias. Our study overcomes many limitations of previous studies,  
9 473 and shows, for the first time that early age of onset of generalized anxiety disorder is  
10 474 associated with increased use of hospital services in adults, after controlling for a range of  
11 475 important confounders.  
12  
13  
14  
15  
16  
17 476

18 477 Population-based research on anxiety is lacking, and thus far, no studies have assessed the  
19 478 association between GAD and non-psychiatric hospitalization. Clinicians should consider  
20 479 that it is not just the diagnosis of the disorder at one point in time that is predictive of  
21 480 deleterious health outcomes; its long-term course is also important. GAD has a waxing and  
22 481 waning course throughout a patient's life, and many of those affected experience relapse  
23 482 after psychiatric treatment. Furthermore, early-onset forms of the disorder have been  
24 483 shown to be more severe, and are the most difficult to treat and have a poor prognosis.[9]  
25 484 As such, examining the course of the disorder and determining the age of onset makes  
26 485 theoretical sense and has clinical implications. Taking a patient's medical history when the  
27 486 presenting complaints are related to anxiety can differentiate those with milder forms  
28 487 (knowing this can reduce unnecessary follow-up investigations) from those with more  
29 488 severe cases that would benefit from medical follow-up. Assessing the presence of GAD  
30 489 using DSM-IV criteria is time-consuming in a busy, clinical practice; hence, future studies  
31 490 should replicate our study using brief, validated screening tools. Our findings are also  
32 491 important for policy-makers. Large numbers of people are affected by anxiety and develop  
33 492 GAD early in life (this group then shows a disproportionate consumption of health  
34 493 services)[9], therefore, policy-makers should consider rolling out more widespread anxiety  
35 494 prevention and screening programmes.  
36  
37  
38  
39  
40  
41  
42  
43  
44  
45  
46  
47  
48  
49  
50  
51 495

52 496 We would like to make some recommendations for future research. Younger people are  
53 497 most affected by anxiety disorders[31], therefore, future studies should assess these  
54 498 associations in younger cohorts. Second, clinical studies have shown depression to be highly  
55 499 co-morbid with GAD[16], hence, the impact of comorbidity on the health care system  
56  
57  
58  
59  
60

1  
2  
3 500 should also be examined. Third, previous studies suggest, that across the anxiety disorders,  
4 501 GAD is the most likely to lead to the development and maintenance of chronic  
5 502 conditions.[9] To this end, the mediating effect of chronic conditions in relation to anxiety  
6 503 should be examined. Finally, future research should merge a population-based cohort with  
7 504 primary and secondary care administrative health databases to provide a more complete  
8 505 picture of the burden of anxiety on the health care system.  
9  
10  
11  
12  
13

506

507 **Conclusion**

508

19 509 People with an earlier age of onset for generalized anxiety disorder (GAD) had a higher risk  
20 510 for hospital admissions over 10 years between 1996-1999 and 2009 in the European  
21 511 Prospective Investigation of Cancer in Norfolk study. Altogether, our findings show that a  
22  
23 512 more severe course of anxiety is associated with high health service use rates.  
24  
25  
26  
27  
28  
29  
30  
31  
32  
33  
34  
35  
36  
37  
38  
39  
40  
41  
42  
43  
44  
45  
46  
47  
48  
49  
50  
51  
52  
53  
54  
55  
56  
57  
58  
59  
60

1  
2  
3 513 Acknowledgements: OR received a PhD studentship from the National Institute for Health  
4 514 Research.

5  
6 515

7  
8 516 Competing interest: All authors have completed the ICMJE uniform disclosure form at  
9 517 [www.icmje.org/coi\\_disclosure.pdf](http://www.icmje.org/coi_disclosure.pdf) and declare: no support from any organisation for the  
10 518 submitted work; no financial relationships with any organizations that might have an  
11 519 interest in the submitted work in the previous three years; no other relationships or  
12 520 activities that could appear to have influenced the submitted work.

13  
14 521

15 522 Funding: This work was supported by the Medical Research Council UK (grant number  
16 523 SP2024-0201 and SP2024-0204) and Cancer Research UK (grant number G9502233).

17  
18 524

19 525 Author contributions: OR (corresponding author) had the idea for and conducted the  
20 526 analysis, and wrote the article. CB critically reviewed drafts of the manuscript, KK edited  
21 527 versions of the paper; PS and NW provided feedback into the analysis. OR, CB, KK, LL, PS,  
22 528 and NW contributed to the interpretation of data for the work, agreed to be accountable for  
23 529 all aspects of the work, gave final approval of the version to be published, and made  
24 530 substantial contributions to the analysis and interpretation of data. OR, CB, KK, LL, PS, and  
25 531 NW have seen and approved the final version. OR, CB, KK, LL, PS, and NW had full access to  
26 532 all the data in the study and take responsibility for the integrity of the data and the accuracy  
27 533 of the data analysis. OR acts as guarantor of the study.

28  
29 534

30 535 Transparency declaration: OR affirms that the manuscript is an honest, accurate, and  
31 536 transparent account of the study being reported; that no important aspects of the study  
32 537 have been omitted; and that any discrepancies from the study as planned have been  
33 538 explained.

34  
35 539

36 540 Role of study sponsors and statement of independence: The funding sources had no role in  
37 541 the design and conduct of the study; collection, management, analysis, and interpretation of  
38 542 the data; and preparation, review, or approval of the manuscript.

39  
40 543

1  
2  
3 544 Ethical approval: The study has ethics committee approval from Norfolk Ethics Committee  
4 545 (Rec Ref: 98CN01) and all participants gave informed consent.

5  
6 546

7  
8 547 Data sharing: No additional data available. Original dataset requests should be sent to the  
9 548 corresponding author. Please contact O Remes at [or260@medschl.cam.ac.uk](mailto:or260@medschl.cam.ac.uk) for questions  
10 549 about the statistical code.

11  
12 550

13  
14 551 Copyright: "The Corresponding Author has the right to grant on behalf of all authors and  
15 552 does grant on behalf of all authors, a worldwide licence to the Publishers and its licensees in  
16 553 perpetuity, in all forms, formats and media (whether known now or created in the future),  
17 554 to i) publish, reproduce, distribute, display and store the Contribution, ii) translate the  
18 555 Contribution into other languages, create adaptations, reprints, include within collections  
19 556 and create summaries, extracts and/or, abstracts of the Contribution, iii) create any other  
20 557 derivative work(s) based on the Contribution, iv) to exploit all subsidiary rights in the  
21 558 Contribution, v) the inclusion of electronic links from the Contribution to third party  
22 559 material where-ever it may be located; and, vi) licence any third party to do any or all of the  
23 560 above."

24  
25 561  
26  
27  
28  
29  
30  
31  
32  
33  
34  
35  
36  
37  
38  
39  
40  
41  
42  
43  
44  
45  
46  
47  
48  
49  
50  
51  
52  
53  
54  
55  
56  
57  
58  
59  
60

## 562 REFERENCES

- 563
- 564 1. American Psychiatric Association. (1994). *Diagnostic and Statistical Manual of*
- 565 *Mental Disorders* (4<sup>th</sup> edn). Washington, DC: APA.
- 566 2. Whiteford HA, Degenhardt, Rehm J, et al. Global burden of disease attributable to
- 567 mental and substance use disorders: findings from the global burden of disease
- 568 study 2010. *Lancet* 2013;13:1575-86 doi: [http://dx.doi.org/10.1016/S0140-](http://dx.doi.org/10.1016/S0140-6736(13)61611-6)
- 569 [6736\(13\)61611-6](http://dx.doi.org/10.1016/S0140-6736(13)61611-6).
- 570 3. Greenberg PE, Sisitsky T, Kessler RC, et al. The economic burden of anxiety disorders
- 571 in the 1990s. *J Clin Psychiatry* 1999;60:427-35.
- 572 4. Kroenke K, Spitzer RL, Williams JB, et al. Anxiety disorders in primary care:
- 573 prevalence, impairment, comorbidity, and detection. *Ann Intern Med* 2007;146:317-
- 574 25 doi: [10.7326/0003-4819-146-5-200703060-00004](https://doi.org/10.7326/0003-4819-146-5-200703060-00004).
- 575 5. Comer JS, Blanco C, Hasin DS, et al. Health-related quality of life across the anxiety
- 576 disorders. *J Clin Psychiatry* 2011;72:43–50 doi: [10.4088/JCP.09m05094blu](https://doi.org/10.4088/JCP.09m05094blu) [published
- 577 Online First 24 August 2010].
- 578 6. Tyrer P, Baldwin D. Generalised anxiety disorder. *Lancet* 2006;16:2156–66 doi:
- 579 [http://dx.doi.org/10.1016/S0140-6736\(06\)69865-6](http://dx.doi.org/10.1016/S0140-6736(06)69865-6).
- 580 7. Hoge E, Ivkovic A, Fricchione G. Generalized anxiety disorder: diagnosis and
- 581 treatment. *BMJ* 2012;345:e7500 doi: <https://doi.org/10.1136/bmj.e7500>.
- 582 8. Revicki DA, Travers K, Wyrwich KW. Humanistic and economic burden of generalized
- 583 anxiety disorder in North America and Europe. *J Affect Disord* 2012;140:103–12 doi:
- 584 [10.1016/j.jad.2011.11.014](https://doi.org/10.1016/j.jad.2011.11.014) [published Online First 9 December 2011].
- 585 9. Simpson HB, Neria Y, Lewis-Fernandez R, et al. Anxiety disorders. Theory, research
- 586 and clinical perspectives. New York, US: Cambridge University Press 2010.

- 1  
2  
3 587 10. Schoepf D, Heun R. Anxiety disorders and physical comorbidity: increased prevalence  
4  
5 588 but reduced relevance of specific risk factors for hospital-based mortality during a  
6  
7 589 12.5-year observation period in general hospital admissions. *Eur Arch Psychiatry Clin*  
8  
9  
10 590 *Neurosci* 2015;265:387-98 doi: 10.1007/s00406-014-0566-9 [published Online First 4  
11  
12 591 December 2014].
- 14 592 11. Gale CR, Batty GD, Osborn DP, et al. Mental disorders across the adult life course and  
15  
16  
17 593 future coronary heart disease: evidence for general susceptibility. *Circulation*  
18  
19 594 2014;129:186-93 doi: 10.1161/CIRCULATIONAHA [published Online First 4 November  
20  
21 595 2013].
- 24 596 12. Maj M. 'Psychiatric comorbidity': an artefact of current diagnostic systems. *Br J*  
25  
26 597 *Psychiatry* 2005;186:182-84 doi: 10.1192/bjp.186.3.182 [published Online First 28  
27  
28 598 February 2005].
- 31 599 **13.** Bryan CJ, Stephenson JA, Morrow CE, et al. Posttraumatic stress symptoms and  
32  
33 600 work-related accomplishment as predictors of general health and medical utilization  
34  
35 601 among special operations forces personnel. *J Nerv Ment Dis* 2014;202:105-10. doi:  
36  
37 602 10.1097/NMD.0000000000000076.
- 40 603 14. Lehavot K, Der-Martirosian C, Simpson TL, et al. The role of military social support in  
41  
42 604 understanding the relationship between PTSD, physical health, and healthcare  
43  
44 605 utilization in women veterans. *J Trauma Stress*. 2013;26:772-5 doi:  
45  
46 606 10.1002/jts.21859 [published Online First 6 November 2013].
- 49 607 15. Stein MB. Public health perspectives on generalized anxiety disorder. *J Clin*  
50  
51 608 *Psychiatry* 2004;65:3-7.

- 1  
2  
3 609 16. Nutt D, Argyropoulos S, Hood S, et al. Generalized anxiety disorder: a comorbid  
4  
5 610 disease. *Eur Neuropsychopharmacol* 2006;16:S109-18 doi:  
6  
7 611 10.1016/j.euroneuro.2006.04.003 [published Online First 5 June 2006].  
8  
9  
10 612 17. Porensky EK, Dew MA, Karp JF, et al. The burden of late-life generalized anxiety  
11  
12 613 disorder: effects on disability, health-related quality of life, and healthcare  
13  
14 614 utilization. *Am J Geriatr Psychiatry* 2009;17:473-82 [published Online First 30 July  
15  
16 615 2012].  
17  
18  
19 616 18. Munk-Jorgensen P, Allgulander C, Dahl AA, et al. Prevalence of generalized anxiety  
20  
21 617 disorder in general practice in Denmark, Finland, Norway, and Sweden. *Psychiatr*  
22  
23 618 *Serv* 2006;57):1738-44 doi: 10.1176/ps.2006.57.12.1738 [published Online First 28  
24  
25 619 February 2005].  
26  
27  
28  
29 620 **19.** Belanger L, Ladouceur R, Morin CM. Generalized anxiety disorder and health care  
30  
31 621 use. *Can Fam Physician* 2005;51:1362-3.  
32  
33  
34 622 20. Wittchen HU, Kessler RC, Beesdo K, et al. Generalized anxiety and depression in  
35  
36 623 primary care: prevalence, recognition, and management. *J Clin Psychiatry*  
37  
38 624 2002;63:24.  
39  
40  
41 625 21. Day N, Oakes S, Luben R, et al. EPIC-Norfolk: study design and characteristics of the  
42  
43 626 cohort. European Prospective Investigation of Cancer. *Br J Cancer* 1999;80:95-103.  
44  
45  
46 627 22. Hayat SA, Luben R, Keevil VL, et al. Cohort profile: a prospective cohort study of  
47  
48 628 objective physical and cognitive capability and visual health in an ageing population  
49  
50 629 of men and women in Norfolk (EPIC-Norfolk 3). *Int J Epidemiol* 2014;43:1063-72 doi:  
51  
52 630 10.1093/ije/dyt086 [published Online First 14 June 2013].  
53  
54  
55  
56  
57  
58  
59  
60



- 1  
2  
3 631 23. Surtees P, Wainwright N, Khaw K, et al. Functional health status, chronic medical  
4  
5 632 conditions and disorders of mood. *Br J Psychiatry* 2003;183:299–303 doi:  
6  
7 633 10.1192/bjp.183.4.299 [published Online First 30 September 2003].  
8  
9  
10 634 24. Leng Y, Wainwright NWJ, Cappuccio FP, et al. Daytime napping and the risk of all-  
11  
12 635 cause and cause-specific mortality: a 13-year follow-up of a British population. *Am J*  
13  
14 636 *Epidemiol* 2014;179:1115-1124 doi: <https://doi.org/10.1093/aje/kwu036> [published  
15  
16  
17 637 Online First 30 March 2014].  
18  
19  
20 638 25. Leng Y, Wainwright NWJ, Cappuccio FP, et al. Self-reported sleep patterns in a British  
21  
22 639 population cohort. *Sleep Med* 2014;15:295-302 doi: 10.1016/j.sleep.2013.10.015.  
23  
24 640 26. Leng Y, Wainwright NW, Cappuccio FP, et al. Daytime napping and increased risk of  
25  
26 641 incident respiratory diseases: symptom, marker, or risk factor? *Sleep Med*  
27  
28 642 2016;23:12-15 doi: 10.1016/j.sleep.2016.06.012 [published Online First 12 July  
29  
30  
31 643 2016].  
32  
33  
34 644 27. Shohaimi S, Luben R, Wareham N, et al. Residential area deprivation predicts  
35  
36 645 smoking habit independently of individual educational level and occupational social  
37  
38 646 class. A cross sectional study in the Norfolk cohort of the European Prospective  
39  
40 647 Investigation into Cancer (EPIC-Norfolk). *J Epidemiol Community Health* 2003;57:270-  
41  
42 648 276 doi: 10.1136/jech.57.4.270.  
43  
44  
45 649 28. Myint PK, Surtees PG, Wainwright NW, et al. Physical health-related quality of life  
46  
47 650 predicts stroke in the EPIC-Norfolk. *Neurology* 2007;69:2243-8 doi:  
48  
49 651 10.1212/01.wnl.0000296010.21252.78.  
50  
51  
52 652 29. Elias P, Halstead K, Prandy K. CASOC: Computer-assisted standard occupational  
53  
54 653 coding. London, England: HMSO 1993.  
55  
56  
57  
58  
59  
60

- 1  
2  
3 654 30. Surtees PG, Wainwright NWJ, Brayne C. Psychosocial aetiology of chronic disease: a  
4  
5 655 pragmatic approach to the assessment of lifetime affective morbidity in an EPIC  
6  
7 656 component study. *J Epidemiol Community Health* 2000;54:114-122 doi:  
8  
9 657 10.1136/jech.54.2.114.  
10  
11  
12 658 31. Remes O, Brayne C, Van der Linde R, et al. A systematic review of reviews on the  
13  
14 659 prevalence of anxiety disorders in adult populations. *Brain Behav* 2016;6:e00497 doi:  
15  
16 660 10.1002/brb3.497 [published Online First 5 June 2016].  
17  
18  
19 661 32. Ware JE, Snow K, Kosinski M, et al. New England Medical Center Hospital. Health  
20  
21 662 Institute. SF-36 Health Survey: Manual and Interpretation Guide. The Health  
22  
23 663 Institute; Boston, MA: New England Medical Center 1993.  
24  
25  
26 664 33. Lakshman R, McConville A, How S, et al. Association between area level socio-  
27  
28 665 economic deprivation and a cluster of behavioural risk factors: Cross sectional,  
29  
30 666 population based study. *J Public Health (Oxf)* 2011;33:234-245. doi:  
31  
32 667 10.1093/pubmed/fdq072 [published Online First 29 September 2010].  
33  
34  
35 668 34. Vetter S, Endrass J, Schweizer I, et al. The effects of economic deprivation on  
36  
37 669 psychological well-being among the working population of Switzerland. *BMC Public*  
38  
39 670 *Health* 2006;6:223. doi: 10.1186/1471-2458-6-223 [published Online First 4  
40  
41 671 September 2006].  
42  
43  
44 672 35. Luppá M, Sikorski C, Motzek T, et al. Health service utilization and costs of depressive  
45  
46 673 symptoms in late life – a systematic review. *Curr Pharm Des* 2012;18:5936-57.  
47  
48  
49 674 36. Ford JD, Trestman RL, Steinberg K, et al. Prospective association of anxiety,  
50  
51 675 depressive, and addictive disorders with high utilization of primary, specialty and  
52  
53 676 emergency medical care. *Soc Sci Med* 2004;58:2145-8 doi:  
54  
55 677 10.1016/j.socscimed.2003.08.017 [published Online First 25 September 2003].  
56  
57  
58  
59  
60

- 1  
2  
3 678 37. Deacon B, Lickel J, Abramowitz JS. Medical utilization across the anxiety disorders. *J*  
4  
5 679 *Anxiety Disord* 2008;22:344-50 doi: 10.1016/j.janxdis.2007.03.004 [published Online  
6  
7 680 First 12 March 2007].  
8  
9  
10 681 38. Klassen BJ, Porcerelli JH, Markova T. The effects of PTSD symptoms on health care  
11  
12 682 resource utilization in a low-income, urban primary care setting. *J Trauma Stress*  
13  
14 683 2013;26:636-9 doi: 10.1002/jts.21838 [published Online First 12 September 2013].  
15  
16  
17 684  
18 685  
19 686  
20 687  
21  
22  
23  
24  
25  
26  
27  
28  
29  
30  
31  
32  
33  
34  
35  
36  
37  
38  
39  
40  
41  
42  
43  
44  
45  
46  
47  
48  
49  
50  
51  
52  
53  
54  
55  
56  
57  
58  
59  
60

1  
2  
3 688 **Figure 1 – Flowchart of EPIC-Norfolk cohort**  
4

5 689 This is a flowchart showing the number of participants at each study stage: the number  
6  
7 690 approached to participate in the EPIC-Norfolk study, the number enrolled at baseline, and  
8  
9 691 with complete data on all covariates. The EPIC-Norfolk study consists of middle-aged and  
10  
11 692 older British people.  
12  
13

14 693  
15 694  
16 695  
17 696  
18 697  
19 698  
20  
21  
22  
23  
24  
25  
26  
27  
28  
29  
30  
31  
32  
33  
34  
35  
36  
37  
38  
39  
40  
41  
42  
43  
44  
45  
46  
47  
48  
49  
50  
51  
52  
53  
54  
55  
56  
57  
58  
59  
60

For peer review only

1  
2  
3  
4  
5  
6  
7  
8  
9  
10  
11  
12  
13  
14  
15  
16  
17  
18  
19  
20  
21  
22  
23  
24  
25  
26  
27  
28  
29  
30  
31  
32  
33  
34  
35  
36  
37  
38  
39  
40  
41  
42  
43  
44  
45  
46  
47  
48  
49  
50  
51  
52  
53  
54  
55  
56  
57  
58  
59  
60

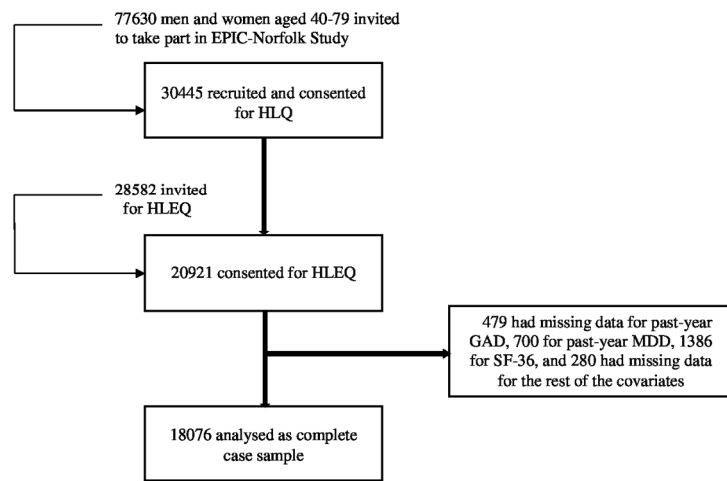

Figure 1: Flowchart of EPIC-Norfolk cohort

215x279mm (200 x 200 DPI)

Please see the article line numbers (column on the right) and the explanations provided.

STROBE Statement—checklist of items that should be included in reports of observational studies

|                              | Item No | Recommendation                                                                                                                                                                                                                                                                                                                                                                                                                                                                                                                                                                                                                                                                                   | Line numbers within the article                                                                          |
|------------------------------|---------|--------------------------------------------------------------------------------------------------------------------------------------------------------------------------------------------------------------------------------------------------------------------------------------------------------------------------------------------------------------------------------------------------------------------------------------------------------------------------------------------------------------------------------------------------------------------------------------------------------------------------------------------------------------------------------------------------|----------------------------------------------------------------------------------------------------------|
| <b>Title and abstract</b>    | 1       | (a) Indicate the study's design with a commonly used term in the title or the abstract<br>(b) Provide in the abstract an informative and balanced summary of what was done and what was found                                                                                                                                                                                                                                                                                                                                                                                                                                                                                                    | 9, 40, 43<br>35-68                                                                                       |
| <b>Introduction</b>          |         |                                                                                                                                                                                                                                                                                                                                                                                                                                                                                                                                                                                                                                                                                                  |                                                                                                          |
| Background/rationale         | 2       | Explain the scientific background and rationale for the investigation being reported                                                                                                                                                                                                                                                                                                                                                                                                                                                                                                                                                                                                             | 95-144                                                                                                   |
| Objectives                   | 3       | State specific objectives, including any prespecified hypotheses                                                                                                                                                                                                                                                                                                                                                                                                                                                                                                                                                                                                                                 | 146-150                                                                                                  |
| <b>Methods</b>               |         |                                                                                                                                                                                                                                                                                                                                                                                                                                                                                                                                                                                                                                                                                                  |                                                                                                          |
| Study design                 | 4       | Present key elements of study design early in the paper                                                                                                                                                                                                                                                                                                                                                                                                                                                                                                                                                                                                                                          | 157-158                                                                                                  |
| Setting                      | 5       | Describe the setting, locations, and relevant dates, including periods of recruitment, exposure, follow-up, and data collection                                                                                                                                                                                                                                                                                                                                                                                                                                                                                                                                                                  | 158-169                                                                                                  |
| Participants                 | 6       | (a) <i>Cohort study</i> —Give the eligibility criteria, and the sources and methods of selection of participants. Describe methods of follow-up<br><i>Case-control study</i> —Give the eligibility criteria, and the sources and methods of case ascertainment and control selection. Give the rationale for the choice of cases and controls<br><i>Cross-sectional study</i> —Give the eligibility criteria, and the sources and methods of selection of participants<br>(b) <i>Cohort study</i> —For matched studies, give matching criteria and number of exposed and unexposed<br><i>Case-control study</i> —For matched studies, give matching criteria and the number of controls per case | 158-160, 162-165                                                                                         |
| Variables                    | 7       | Clearly define all outcomes, exposures, predictors, potential confounders, and effect modifiers. Give diagnostic criteria, if applicable                                                                                                                                                                                                                                                                                                                                                                                                                                                                                                                                                         | 175-252                                                                                                  |
| Data sources/<br>measurement | 8       | For each variable of interest, give sources of data and details of methods of assessment (measurement). Describe comparability of assessment methods if there is                                                                                                                                                                                                                                                                                                                                                                                                                                                                                                                                 | There were two variables of interest in this study: generalized anxiety disorder and hospital admissions |

1  
2  
3  
4  
5  
6  
7  
8  
9  
10  
11  
12  
13  
14  
15  
16  
17  
18  
19  
20  
21  
22  
23  
24  
25  
26  
27  
28  
29  
30  
31  
32  
33  
34  
35  
36  
37  
38  
39  
40  
41  
42  
43  
44  
45  
46  
47  
48  
49

more than one group

(175-185, 226-252). The others are potential confounders – in the methods I list them all, indicate how they were assessed and mention that they were collected through the baseline, self-reported postal HLQ questionnaire as well as the HLEQ.

|                        |    |                                                                                                                                                                                                                                                                                                           |                                                                                                                                                                                                                                                                            |
|------------------------|----|-----------------------------------------------------------------------------------------------------------------------------------------------------------------------------------------------------------------------------------------------------------------------------------------------------------|----------------------------------------------------------------------------------------------------------------------------------------------------------------------------------------------------------------------------------------------------------------------------|
| Bias                   | 9  | Describe any efforts to address potential sources of bias                                                                                                                                                                                                                                                 | 278 (complete case analysis)                                                                                                                                                                                                                                               |
| Study size             | 10 | Explain how the study size was arrived at                                                                                                                                                                                                                                                                 | 276-278                                                                                                                                                                                                                                                                    |
| Quantitative variables | 11 | Explain how quantitative variables were handled in the analyses. If applicable, describe which groupings were chosen and why                                                                                                                                                                              | In the methods, I mention how the variables were derived based on the raw data provided by participants in the questionnaires.<br>Confounders: 193-212; Generalized anxiety disorder: 180-185; Information on how health service use data was handled in analyses: 260-262 |
| Statistical methods    | 12 | (a) Describe all statistical methods, including those used to control for confounding                                                                                                                                                                                                                     | 254-278                                                                                                                                                                                                                                                                    |
|                        |    | (b) Describe any methods used to examine subgroups and interactions                                                                                                                                                                                                                                       | We did not examine any subgroups or interactions.                                                                                                                                                                                                                          |
|                        |    | (c) Explain how missing data were addressed                                                                                                                                                                                                                                                               | We indicated that this was a complete-case analysis.                                                                                                                                                                                                                       |
|                        |    | (d) <i>Cohort study</i> —If applicable, explain how loss to follow-up was addressed<br><i>Case-control study</i> —If applicable, explain how matching of cases and controls was addressed<br><i>Cross-sectional study</i> —If applicable, describe analytical methods taking account of sampling strategy | Loss to follow-up was not a problem in this study.<br>We were able to track down all participants using various means, unless they expressed that they wished to be removed from the mailing list. We elaborate on this in the manuscript.                                 |
|                        |    | (e) Describe any sensitivity analyses                                                                                                                                                                                                                                                                     | There were no sensitivity analyses.                                                                                                                                                                                                                                        |

**Results**

|                  |     |                                                                                                                                                                                                              |                                                                                                                                                                                                                                                                                                                                                                                                                                                                                                                   |
|------------------|-----|--------------------------------------------------------------------------------------------------------------------------------------------------------------------------------------------------------------|-------------------------------------------------------------------------------------------------------------------------------------------------------------------------------------------------------------------------------------------------------------------------------------------------------------------------------------------------------------------------------------------------------------------------------------------------------------------------------------------------------------------|
| Participants     | 13* | (a) Report numbers of individuals at each stage of study—eg numbers potentially eligible, examined for eligibility, confirmed eligible, included in the study, completing follow-up, and analysed            | 287-291                                                                                                                                                                                                                                                                                                                                                                                                                                                                                                           |
|                  |     | (b) Give reasons for non-participation at each stage                                                                                                                                                         | We do not have the reasons for non-participation, because these data were not collected when the study was initiated in 1993.                                                                                                                                                                                                                                                                                                                                                                                     |
|                  |     | (c) Consider use of a flow diagram                                                                                                                                                                           | Flow diagram included in submission.                                                                                                                                                                                                                                                                                                                                                                                                                                                                              |
| Descriptive data | 14* | (a) Give characteristics of study participants (eg demographic, clinical, social) and information on exposures and potential confounders                                                                     | 293-294, 296-312, 314-317; we provided characteristics for those with vs. without GAD, because we felt it was important to show the characteristics of the ‘exposed’ vs. ‘non-exposed’ group (see also Table 1)                                                                                                                                                                                                                                                                                                   |
|                  |     | (b) Indicate number of participants with missing data for each variable of interest                                                                                                                          | 287-289                                                                                                                                                                                                                                                                                                                                                                                                                                                                                                           |
|                  |     | (c) <i>Cohort study</i> —Summarise follow-up time (eg, average and total amount)                                                                                                                             | 291                                                                                                                                                                                                                                                                                                                                                                                                                                                                                                               |
| Outcome data     | 15* | <i>Cohort study</i> —Report numbers of outcome events or summary measures over time                                                                                                                          | 293                                                                                                                                                                                                                                                                                                                                                                                                                                                                                                               |
|                  |     | <i>Case-control study</i> —Report numbers in each exposure category, or summary measures of exposure                                                                                                         |                                                                                                                                                                                                                                                                                                                                                                                                                                                                                                                   |
|                  |     | <i>Cross-sectional study</i> —Report numbers of outcome events or summary measures                                                                                                                           |                                                                                                                                                                                                                                                                                                                                                                                                                                                                                                                   |
| Main results     | 16  | (a) Give unadjusted estimates and, if applicable, confounder-adjusted estimates and their precision (eg, 95% confidence interval). Make clear which confounders were adjusted for and why they were included | Table 3 contains unadjusted and progressively adjusted estimates. We also discussed the findings within the text, and provide odds ratios and 95% confidence intervals. We included the confounders based on the literature – we mention this in the paper. As per strobe, we included this information in the methods section; and we omitted repeating this in the results section to reduce redundancy. However, if the editor would like us to repeat this information in the results, we are happy to do so. |
|                  |     | (b) Report category boundaries when continuous variables were categorized                                                                                                                                    | The age cut-offs are provided. In regards to the                                                                                                                                                                                                                                                                                                                                                                                                                                                                  |



physical component summary of the SF-36, the methods section states that those below and above the median cut-point were compared. The results section (footnotes of the tables) indicates that 3 units of alcohol was the cut point used to differentiate those with ‘high’ versus ‘low’ alcohol intake.

(c) If relevant, consider translating estimates of relative risk into absolute risk for a meaningful time period

|                          |    |                                                                                                                                                                            |                                                                                                                                                                                    |
|--------------------------|----|----------------------------------------------------------------------------------------------------------------------------------------------------------------------------|------------------------------------------------------------------------------------------------------------------------------------------------------------------------------------|
| Other analyses           | 17 | Report other analyses done—eg analyses of subgroups and interactions, and sensitivity analyses                                                                             | Not applicable.                                                                                                                                                                    |
| <b>Discussion</b>        |    |                                                                                                                                                                            |                                                                                                                                                                                    |
| Key results              | 18 | Summarise key results with reference to study objectives                                                                                                                   | 375-379, 388-390                                                                                                                                                                   |
| Limitations              | 19 | Discuss limitations of the study, taking into account sources of potential bias or imprecision. Discuss both direction and magnitude of any potential bias                 | 400-424                                                                                                                                                                            |
| Interpretation           | 20 | Give a cautious overall interpretation of results considering objectives, limitations, multiplicity of analyses, results from similar studies, and other relevant evidence | 465-490 and 505-508 (We also have a section comparing our study results to those of others: 426-450 as well as a section on potential mechanisms explaining our findings: 452-463) |
| Generalisability         | 21 | Discuss the generalisability (external validity) of the study results                                                                                                      | 423-424                                                                                                                                                                            |
| <b>Other information</b> |    |                                                                                                                                                                            |                                                                                                                                                                                    |
| Funding                  | 22 | Give the source of funding and the role of the funders for the present study and, if applicable, for the original study on which the present article is based              | 518-519                                                                                                                                                                            |

\*Give information separately for cases and controls in case-control studies and, if applicable, for exposed and unexposed groups in cohort and cross-sectional studies.

**Note:** An Explanation and Elaboration article discusses each checklist item and gives methodological background and published examples of transparent reporting. The STROBE checklist is best used in conjunction with this article (freely available on the Web sites of PLoS Medicine at <http://www.plosmedicine.org/>, Annals of Internal Medicine at <http://www.annals.org/>, and Epidemiology at <http://www.epidem.com/>). Information on the STROBE Initiative is available at [www.strobe-statement.org](http://www.strobe-statement.org).

# BMJ Open

## Generalized anxiety disorder and non-psychiatric hospital admissions: findings from a large, population study

|                                 |                                                                                                                                                                                                                                                                                                                                                                                                                                                                                                       |
|---------------------------------|-------------------------------------------------------------------------------------------------------------------------------------------------------------------------------------------------------------------------------------------------------------------------------------------------------------------------------------------------------------------------------------------------------------------------------------------------------------------------------------------------------|
| Journal:                        | <i>BMJ Open</i>                                                                                                                                                                                                                                                                                                                                                                                                                                                                                       |
| Manuscript ID                   | bmjopen-2017-018539.R1                                                                                                                                                                                                                                                                                                                                                                                                                                                                                |
| Article Type:                   | Research                                                                                                                                                                                                                                                                                                                                                                                                                                                                                              |
| Date Submitted by the Author:   | 27-Sep-2017                                                                                                                                                                                                                                                                                                                                                                                                                                                                                           |
| Complete List of Authors:       | Remes, Olivia; University of Cambridge, Public Health and Primary Care<br>Wainwright, Nicholas; University of Cambridge, UK, Public Health and Primary Care (retired)<br>Surtees, Paul; University of Cambridge, Department of Public Health and Primary Care<br>LaFortune, Louise; University of Cambridge, Institute of Public Health<br>Khaw, Kay-Tee; University of Cambridge, Department of Public Health and Primary Care<br>Brayne, Carol; University of Cambridge, Institute of Public Health |
| <b>Primary Subject Heading</b>: | Mental health                                                                                                                                                                                                                                                                                                                                                                                                                                                                                         |
| Secondary Subject Heading:      | Health services research, Public health                                                                                                                                                                                                                                                                                                                                                                                                                                                               |
| Keywords:                       | EPIDEMIOLOGY, MENTAL HEALTH, PUBLIC HEALTH                                                                                                                                                                                                                                                                                                                                                                                                                                                            |
|                                 |                                                                                                                                                                                                                                                                                                                                                                                                                                                                                                       |

SCHOLARONE™  
Manuscripts

1  
2  
3  
4  
5  
6  
7  
8  
9  
10  
11  
12  
13  
14  
15  
16  
17  
18  
19  
20  
21  
22  
23  
24  
25  
26  
27  
28  
29  
30  
31  
32  
33  
34  
35  
36  
37  
38  
39  
40  
41  
42  
43  
44  
45  
46  
47  
48  
49  
50  
51  
52  
53  
54  
55  
56  
57  
58  
59  
60

1  
2  
3  
4  
5  
6  
7  
8  
9  
10  
11  
12  
13  
14  
15  
16  
17  
18  
19  
20  
21  
22  
23  
24  
25  
26  
27  
28  
29  
30  
31  
32  
33  
34  
35  
36  
37  
38  
39  
40  
41  
42  
43  
44  
45  
46  
47  
48  
49  
50  
51  
52  
53  
54  
55  
56  
57  
58  
59  
60

**Generalized anxiety disorder and non-psychiatric hospital admissions: findings from a large, population study**

Olivia Remes<sup>1</sup>, Nick Wainwright<sup>2</sup>, Paul Surtees<sup>1</sup>, Louise Lafortune<sup>1</sup>, Kay-Tee Khaw<sup>3</sup>, Carol Brayne<sup>1</sup>

<sup>1</sup>Department of Public Health and Primary Care, University of Cambridge, Forvie Site, Robinson Way, Cambridge, UK CB2 0SR

<sup>2</sup>(Retired) Department of Public Health and Primary Care, University of Cambridge, 2 Worts' Causeway, Cambridge, UK CB1 8RN

<sup>3</sup>Department of Public Health and Primary Care, University of Cambridge, 2 Worts' Causeway, Cambridge, UK CB1 8RN

Figures: 1; Tables: 4

Correspondence to: Olivia Remes [or260@medschl.cam.ac.uk](mailto:or260@medschl.cam.ac.uk), telephone: 07776740550

1  
2  
3 31 **ABSTRACT**  
4 32

5 33  
6 34 **OBJECTIVE**

7 35 Generalized anxiety disorder (GAD) is the most common anxiety disorder in the general  
8 36 population, and has been associated with high economic and human burden. However, it  
9 37 has been neglected in the health services literature. The objective of this study will be to  
10 38 assess whether GAD leads to non-psychiatric hospital admissions using data from the  
11 39 European Prospective Investigation of Cancer-Norfolk. Other aims include determining  
12 40 whether early or late onset forms of the disorder, episode chronicity and frequency, and  
13 41 comorbidity with major depressive disorder (MDD) contribute to non-psychiatric hospital  
14 42 admissions.  
15 43

16 44 **DESIGN**

17 45 Large, population study.  
18 46

19 47 **SETTING**

20 48 UK population-based cohort.  
21 49

22 50 **PARTICIPANTS**

23 51 30,445 people over the age of 40 were recruited through general practice registers in  
24 52 England. Of these, 20,919 completed a structured health and lifestyle questionnaire used to  
25 53 assess GAD. Anxiety was examined in 1996-2000, and health service use was captured  
26 54 between 1999/00 and 2009 through record linkage with large, administrative health  
27 55 databases. 17,939 participants had complete data on covariates.  
28 56

29 57 **MAIN OUTCOME MEASURE**

30 58 Past-year GAD defined according to the Diagnostic and Statistical Manual of Mental  
31 59 Disorders, fourth edition.  
32 60

33 61 **RESULTS**

34 62 In this study, 2.2% (393/17,939) respondents had GAD. Anxiety was not independently  
35 63 associated with non-psychiatric hospital admissions (IRR=1.04, 95% CI: 0.90, 1.20) over nine  
36 64 years. However, those who developed anxiety before 30 years of age seemed to be at  
37 65 increased risk for hospital service use (IRR=1.16, 95% CI: 0.95, 1.41). Those whose anxiety  
38 66 was comorbid with depression showed a statistically significant association with non-  
39 67 psychiatric hospital admissions (IRR=1.23, 95% CI: 1.02, 1.49).  
40 68

41 69 **CONCLUSION**

42 70 People with an earlier age of GAD onset and who had MDD comorbidity were at an  
43 71 increased risk for hospital admissions. Clinicians should consider that it may not be the  
44 72 diagnosis of the disorder at one point in time that is predictive of deleterious health  
45 73 outcomes; rather its long-term course and different forms of the disorder might be of  
46 74 greater importance.  
47 75

48 76 Key words: Anxiety, anxiety disorders, health services  
49 77  
50  
51  
52  
53  
54  
55  
56  
57  
58  
59  
60

78 **ARTICLE SUMMARY**79 **Strengths and limitations of this study**

- 80 • We used a large, population-based sample of middle- and older-aged adults and  
81 adjusted for a range of important confounders, such as, sociodemographic factors  
82 and medical history.  
83
- 84 • We used a structured, self-reported questionnaire to assess presence of past-year  
85 GAD, and participants were followed for 9 years.  
86
- 87 • We examined health services through record linkage with large, administrative  
88 health databases.  
89
- 90 • Those who participated in this study were somewhat less deprived and healthier  
91 than individuals living in other parts of England; therefore, our results may not  
92 generalize to people living in extremely deprived circumstances.  
93  
94

## INTRODUCTION

95  
96  
97 Anxiety disorders[1] are the most common class of psychiatric disorders in the general  
98 population. The Global Burden of Disease study[2] estimated that anxiety disorders  
99 contribute to 26.8 million disability adjusted life years, and their annual direct cost is \$42.3  
100 billion[3]. Generalized anxiety disorder (GAD) is characterized by excessive, pervasive  
101 worry, and a number of additional symptoms, such as restlessness and muscle tension. It is  
102 a prevalent and disabling condition in adults, and can lead to serious impairment in social  
103 and occupational functioning.[4] GAD is associated with poor quality of life, impaired  
104 functioning and risk of suicide.[5-8] Across the anxiety disorders, this condition has been  
105 found to be the most debilitating.[5, 9] Although there is effective treatment for GAD, only  
106 a third of those affected receive any treatment.[8] This is because anxiety disorders are  
107 frequently under-recognized and mismanaged by clinicians in primary care, which is often  
108 the first point of contact for those with mental health problems.[10]

109  
110 Although detection of anxiety in clinical settings is poor[11, 12] and the presence of  
111 undiagnosed mental health problems can contribute to further emotional distress in  
112 patients down the line[12], it could be that disorders such as GAD represent more than just  
113 psychological or worry-related symptoms. It may be that anxiety symptoms are masking  
114 underlying poor physical health or could be an early warning signal for future health  
115 problems that are not yet detectable by standard medical tests. Such problems cannot be  
116 simply resolved through psychological therapies or psychotropic medication.

117  
118 Anxiety has been linked to hypothalamic-pituitary-adrenal (HPA)-axis dysregulation and  
119 inflammation, and this can lead to poor health.[9] A recent study of hospitalized  
120 patients[13] also showed that people with anxiety disorders had more co-morbid physical  
121 conditions, including cardiovascular diseases and their risk factors, compared to people  
122 without anxiety disorders. Conversely, anxiety could also represent a response to  
123 underlying medical illness, and physical illness can exacerbate anxiety; the possibility of a  
124 bidirectional relationship between anxiety and physical health should not be excluded.[14,  
125 15] Compelling evidence from prospective studies, however, has shown that anxiety can

1  
2  
3 126 indeed increase the risk of serious chronic conditions, such as cancer[16] and coronary heart  
4  
5 127 disease (CHD)[17].

6  
7 128 When investigating the links between mental disorders and health outcomes, early or late-  
8  
9 129 onset forms of anxiety disorders, as well as psychiatric comorbidity should be also  
10  
11 130 considered. A study[18] of over one million Swedish men followed for over 20 years  
12  
13 131 showed that early-onset forms of mental disorders in particular led to increased risk of  
14  
15 132 incident CHD. Anxiety disorders, such as, GAD are also frequently comorbid with major  
16  
17 133 depressive disorder (MDD)[19], and psychiatric comorbidity has been associated with  
18  
19 134 poorer quality of life, worse prognosis, and higher use of health services for mental health  
20  
21 135 problems than pure forms of the disorder.[20, 21, 22] Therefore, identifying clinical aspects,  
22  
23 136 such as, early or late onset forms of the condition, episode chronicity and frequency, and  
24  
25 137 comorbidity with MDD can lead to better clinical management and more accurate  
26  
27 138 prediction of future disability and health service use.[23]

28  
29 139  
30  
31 140 GAD is one of the most common anxiety disorders in the general population[24] and the  
32  
33 141 primary care setting[25], and has been associated with high economic and human burden.  
34  
35 142 However, it has been neglected in the health services literature, with the exception of some  
36  
37 143 studies showing GAD to contribute to higher use of primary care services in primary care  
38  
39 144 samples.[26-29] Clinical samples, however, have the potential for self-selection bias.  
40  
41 145 Whether GAD leads to non-psychiatric hospital admissions is unknown.

42  
43 146  
44  
45 147 The objective of this study will be to assess the association between GAD and non-  
46  
47 148 psychiatric hospital admissions in a longitudinal, population cohort of over 18,000 British  
48  
49 149 individuals followed for 10 years. The aim is also to determine whether early or late onset  
50  
51 150 forms of the disorder, episode frequency and chronicity, and comorbidity with MDD  
52  
53 151 contribute to non-psychiatric hospital admissions.

54  
55  
56  
57  
58  
59  
60  
152  
153

## METHODS

### Study population

The study population was drawn from the European Prospective Investigation of Cancer-Norfolk longitudinal, cohort study, described in detail elsewhere.[30, 31] Briefly, a total of 30,445 participants over the age of 40 living in Norwich and the surrounding towns and rural areas were recruited between 1993 and 1997 using general practice registers. At baseline, they completed a health questionnaire capturing sociodemographics and medical history. During follow-up, between 1993 and 1999/2000, participants completed self-reported postal questionnaires provided they: 1) were still alive, 2) did not ask to be removed from the study's mailing list, and 3) had a valid mailing address. Between 1996 and 1999/2000, respondents completed a Health and Life Experiences Questionnaire (HLEQ)[30] used to capture information on psychiatric disorders, other psychosocial factors, and risk behaviours. Record linkage with administrative health databases using a unique identifier was used to determine hospitalization admissions data until 2009.

All participants recruited through general-practice registers and who completed a baseline health questionnaire were eligible to be included in our study; those who completed a psychosocial questionnaire during follow-up were eligible to be included in our analysis.

### Assessment of GAD

The HLEQ was used to derive a measure of GAD according to the Diagnostic and Statistical Manual of Mental Disorders, fourth edition. The HLEQ captured the onset and offset timings of episodes of past-year GAD.[32] Past-year GAD consisted of at least one episode that had offset within 12 months of administration of the HLEQ. DSM-IV GAD was diagnosed if participants reported having uncontrollable, excessive worry for six months or longer on most days than not that resulted in disability or impairment. In addition, at least three of the following symptoms needed to have been present: restlessness, irritability, muscle tension, fatigue, trouble concentrating because of worry, mind going blank, trouble falling asleep, trouble staying asleep, and feeling keyed up or on edge.



1  
2  
3 186 **Assessment of covariates**  
4

5 187

6 188 Potential confounders (based on the literature) included sociodemographics (age, sex,  
7 189 education, marital status, social class, employment), prevalent physical diseases, disability,  
8 190 MDD, and risk behaviours (alcohol use, smoking, physical activity). The final categorization  
9 191 of the variables took cell size into account and was also done in accordance with previous  
10 192 literature.[32, 33-38] Age was first assessed as a categorical variable, and subsequently  
11 193 divided into 10-year bands. Sex was categorized into male vs. female; marital status was  
12 194 categorized into: married, single (or never married), and others (widowed, divorced,  
13 195 separated); educational attainment into high (vocational or formal qualifications at the A- or  
14 196 O-level or degree-level qualifications) vs. low (no formal qualifications). Social class was  
15 197 derived using the Computer-Assisted Standard Occupational Coding[38] and categorized as  
16 198 follows: I (professionals), II (managerial and technical occupations), III non-manual and III  
17 199 manual (skilled workers), IV (partly skilled workers), and V (unskilled manual workers). For  
18 200 men, social class was coded using their own occupation except when they were unemployed  
19 201 or retired in which case their partner's social class was used. Unemployed men without  
20 202 partners were unclassified. Social class in women was based on their partner's except when  
21 203 the partner's social class was unclassified, missing, or they had no partner in which case  
22 204 social class was based on their own occupation. An unemployed woman without a partner  
23 205 was coded as unclassified. The final categorization of social class included manual: skilled  
24 206 manual, partly skilled, and unskilled; and non-manual: professionals, managerial and  
25 207 technical, and skilled non-manual. Employment was divided into yes vs. no.  
26 208

27 209

28 209 Behaviour risk factor measures included alcohol intake (units of alcohol/week), smoking  
29 210 status (current, former, non-smoker), and physical activity (inactive, moderately inactive,  
30 211 moderately active, active). Presence of past-year DSM-IV major depressive disorder (MDD)  
31 212 (yes/no) was also assessed.[39]  
32 213

33 214

34 214 Individual-level health status was assessed through the construction of a variable capturing  
35 215 major prevalent physical diseases associated with anxiety.[40] This was based on HLQ  
36 216 questions asking participants: "Has the doctor ever told you that you have any of the  
37 217 following?", followed by a list of options, such as stroke, myocardial infarction, and cancer.  
38  
39  
40  
41  
42  
43  
44  
45  
46  
47  
48  
49  
50  
51  
52  
53  
54  
55  
56  
57  
58  
59  
60

1  
2  
3 218 To determine disability levels, we used the physical component summary score (PCS) of the  
4  
5 219 Medical Outcomes Study 36-Item Short Form (SF-36), a widely-used, validated self-  
6  
7 220 assessment tool. A score of 100 represents no disability and 0 represents a high level of  
8  
9 221 disability.[41] PCS scores were dichotomized above and below the median.

10 222

11 223 All of these individual-level variables were regarded as potential confounders and selected  
12  
13 224 based on the literature and their association with anxiety and health service use.[42, 43]  
14

15 225

### 16 226 **Hospital service use**

17 227

18 228 All analyses are based on non-psychiatric hospitalizations. Primary care service use was not  
19  
20 229 captured in this study.  
21

22 230

23 231 Frequency of hospitalization between 1999/00 and 2009 was determined using  
24  
25 232 administrative health databases maintained by the National Health Service. The East  
26  
27 233 Norfolk Primary Health Care trust databases were used, and these are updated on an  
28  
29 234 ongoing basis and provide information on clinical and administrative data from participating  
30  
31 235 facilities, such as, hospitals.  
32

33 236

34 237 England is under a publicly-funded health care system (the National Health Service), free at  
35  
36 238 the point of delivery; therefore, we expect factors, such as access to health insurance or  
37  
38 239 personal income, to have minimal impact on the care that is obtained by study participants.

39 240 The databases used in this study are maintained by the National Health Service, which is  
40  
41 241 likely to capture most hospital admissions from the population, as private sector provision is  
42  
43 242 minimal. This means that admissions data in our study can be considered complete for the  
44  
45 243 ascertainment of hospital/health service use, and the likelihood of bias minimal. To access  
46  
47 244 hospital services in the UK, a referral is needed from the primary care practitioner, who acts  
48  
49 245 as a gate-keeper to secondary care.  
50

51 246

52 247 The East Norfolk Primary Health Care databases were linked to the EPIC-Norfolk cohort  
53  
54 248 using participants' unique National Health Service number, which allows complete record  
55  
56 249 linkage across settings and calendar time.  
57  
58  
59  
60

1  
2  
3 250 Vital status for participants was determined through record linkage with the United  
4  
5 251 Kingdom Office of National Statistics. Vital status was available for all participants. This  
6  
7 252 allowed us to exclude those who died before their health service use was ascertained.  
8  
9 253

### 10 254 **Statistical Analysis**

11 255  
12  
13 256 First, demographics, social class, medical and psychiatric conditions, and risk behaviours  
14  
15 257 were compared by GAD status - the chi-square test was used to determine whether  
16  
17 258 differences were statistically significant for categorical variables. Second, the mean number  
18  
19 259 of hospital admissions was determined for each characteristic/covariate - the Kruskal Wallis  
20  
21 260 test was used to determine statistical significance for categorical covariates with three or  
22  
23 261 more categories, while the Wilcoxon rank-sum test was used for dichotomous covariates.  
24  
25 262

26 263 Since the number of hospital admissions was skewed and the variance was much larger than  
27  
28 264 the mean, zero-inflated negative binomial regression was used for frequency of hospital  
29  
30 265 utilization (number of hospital admissions). The log-likelihood test showed that this model  
31  
32 266 was superior to Poisson regression. Three models were fitted for hospital admissions with  
33  
34 267 progressive adjustment of covariates: model A adjusted for sociodemographics (age, sex,  
35  
36 268 education, marital status, social class, employment), physical conditions and disability;  
37  
38 269 model B further accounted for past-year MDD (assessed at the same questionnaire point as  
39  
40 270 past-year GAD); and model C further controlled for physical activity, alcohol, and smoking.  
41  
42 271 Multiple imputations for missing data were also carried out on the fully-adjusted model  
43  
44 272 assessing the association between past-year GAD and non-psychiatric hospitalization (our  
45  
46 273 primary objective).  
47  
48 274

49 275 Finally, we determined whether the risk for hospitalization was higher among those with: 1)  
50  
51 276 3 or more episodes of lifetime GAD (versus those with fewer than 3 episodes or no GAD), 2)  
52  
53 277 episodes that lasted on average 6 months or more (versus those with fewer than 6 months  
54  
55 278 or no GAD), 3) age of onset at 30 years or younger (versus people with age at onset over 30  
56  
57 279 years or no GAD), and 4) psychiatric comorbidity with MDD (versus no GAD-MDD  
58  
59 280 comorbidity). Two-sided statistical tests for the maximum likelihood zero inflation  
60

1  
2  
3 281 parameter estimates were conducted and a p-value of <0.05 was used for statistical  
4 282 significance. Analyses were implemented in SAS, version 9.3.

5  
6 283

7  
8 284 To arrive at the study size, we went through the following steps: of the 30,445 who  
9 285 completed the baseline HLQ, we retained those participants who completed the HLEQ  
10 286 (20,919), and of these, we kept those people with complete data on all covariates (17,939).  
11 287 (Figure 1)

12  
13  
14 288

### 15 16 17 18 289 **Patient involvement**

19 290

20  
21 291 There were no patients involved in the development of the research question and outcome  
22 292 measures, the design of the study, or the recruitment to and conduct of the study.

23  
24  
25 293  
26  
27  
28  
29  
30  
31  
32  
33  
34  
35  
36  
37  
38  
39  
40  
41  
42  
43  
44  
45  
46  
47  
48  
49  
50  
51  
52  
53  
54  
55  
56  
57  
58  
59  
60

**RESULTS**

294  
295  
296 Of the 30,445 people recruited at baseline, 20,919 participants completed the HLEQ; most  
297 of the missing observations were from past-year GAD (479), past-year MDD (700), and  
298 disability (1386); the rest of the missing observations were generated from the other  
299 covariates (Figure 1). Notable findings from the missing data analysis show that people with  
300 missing GAD more often had pre-existing health conditions, high disability, MDD, low  
301 alcohol consumption, and were without employment (Appendix I).

302  
303 The final sample included a total of 17,939 participants. Participants were assessed  
304 between 1999/00 and 2009 (followed for 9 years) (Figure 1).

305  
306 In 1996-2000, GAD was present in 393 out of 17,939 (2.2%) people. Table 1 shows the  
307 baseline characteristics of participants by GAD status.

308

309 **Table 1 Percentage and number of people with past-year GAD reported in 1996-2000**  
 310 **according to sociodemographic factors, health status, and behaviour risk factors for the**  
 311 **EPIC-Norfolk cohort (n=17,939)**  
 312

| Characteristic                         | Number with characteristic | Percentage and number with past-year GAD |
|----------------------------------------|----------------------------|------------------------------------------|
| <b>Socio-demographics</b>              |                            |                                          |
| <b>Age (years)</b>                     |                            |                                          |
| <50                                    | 2359                       | 3.4 (79) <sup>a</sup>                    |
| 50-60                                  | 6209                       | 2.9 (179)                                |
| 60-70                                  | 5733                       | 1.6 (94)                                 |
| 70+                                    | 3638                       | 1.1 (41)                                 |
| <b>Sex</b>                             |                            |                                          |
| Women                                  | 9937                       | 2.5 (249) <sup>b</sup>                   |
| Men                                    | 8002                       | 1.8 (144)                                |
| <b>Education<sup>‡</sup></b>           |                            |                                          |
| Low                                    | 6106                       | 2.0 (120) <sup>b</sup>                   |
| High                                   | 11833                      | 2.3 (273)                                |
| <b>Marital status</b>                  |                            |                                          |
| Single                                 | 686                        | 3.6 (25) <sup>a</sup>                    |
| Married                                | 14538                      | 2.0 (284)                                |
| Other*                                 | 2715                       | 3.1 (84)                                 |
| <b>Social class</b>                    |                            |                                          |
| Manual                                 | 6836                       | 2.0 (137)                                |
| Non-manual                             | 11103                      | 2.3 (256)                                |
| <b>Employment</b>                      |                            |                                          |
| Yes                                    | 7712                       | 2.0 (155)                                |
| No                                     | 10227                      | 2.3 (238)                                |
| <b>Health status</b>                   |                            |                                          |
| <b>Physical conditions<sup>‡</sup></b> |                            |                                          |
| Yes                                    | 9166                       | 2.7 (251) <sup>a</sup>                   |
| No                                     | 8773                       | 1.6 (142)                                |
| <b>Disability level</b>                |                            |                                          |
| High <sup>¶</sup>                      | 8900                       | 3.0 (266) <sup>a</sup>                   |
| Low                                    | 9039                       | 1.4 (127)                                |
| <b>Psychiatric conditions</b>          |                            |                                          |
| <b>Past-year MDD</b>                   |                            |                                          |
| Yes                                    | 934                        | 21.4 (200) <sup>a</sup>                  |
| No                                     | 17005                      | 1.1 (193)                                |
| <b>Behaviour risk factors</b>          |                            |                                          |
| <b>Physical activity</b>               |                            |                                          |
| Active <sup>x</sup>                    | 12822                      | 2.1 (272)                                |
| Inactive                               | 5117                       | 2.4 (121)                                |
| <b>Smoking status</b>                  |                            |                                          |
| Current smoker                         | 1893                       | 4.7 (89) <sup>a</sup>                    |
| Former smoker                          | 7470                       | 1.9 (141)                                |
| Never smoker                           | 8576                       | 1.9 (163)                                |
| <b>Alcohol intake</b>                  |                            |                                          |
| High <sup>α</sup>                      | 9241                       | 2.0 (182) <sup>b</sup>                   |

1  
2  
3  
4  
5  
6  
7  
8  
9  
10  
11  
12  
13  
14  
15  
16  
17  
18  
19  
20  
21  
22  
23  
24  
25  
26  
27  
28  
29  
30  
31  
32  
33  
34  
35  
36  
37  
38  
39  
40  
41  
42  
43  
44  
45  
46  
47  
48  
49  
50  
51  
52  
53  
54  
55  
56  
57  
58  
59  
60

|     |      |           |     |
|-----|------|-----------|-----|
| Low | 8698 | 2.4 (211) | 313 |
|-----|------|-----------|-----|

314

315 ‡ High education: O-level, A-level, degree; low education: refers to no education

316 \* Other: divorced, separated, widowed

317 † Physical conditions: respiratory disease (asthma and bronchitis), allergies and hay fever, stroke, heart

318 attack, cancer, diabetes, thyroid conditions, arthritis

319 ¶ Below the median PCS value of 50.6

320 ‡ Moderately inactive, moderately active, active

321 <sup>a</sup> 3+ units of alc./week (1 pint beer=2 units, 1 glass wine=1 unit, 1 glass sherry=1 unit, 1 glass spirits=1 unit)

322

323 <sup>a</sup>  $P < 0.001$ 324 <sup>b</sup>  $P < 0.05$ 

For peer review only

1  
2  
3 325 Those with GAD were more likely to be younger, women, inactive, current smokers, low  
4 326 alcohol consumers, of higher educational attainment, single, of non-manual social class,  
5 327 without employment, with physical conditions, high levels of disability, and MDD. Table 2  
6 328 summarizes the means and standard deviations of the number of hospital admissions by  
7 329 participant characteristics.  
8  
9  
10  
11  
12

13  
14  
15  
16  
17  
18  
19  
20  
21  
22  
23  
24  
25  
26  
27  
28  
29  
30  
31  
32  
33  
34  
35  
36  
37  
38  
39  
40  
41  
42  
43  
44  
45  
46  
47  
48  
49  
50  
51  
52  
53  
54  
55  
56  
57  
58  
59  
60

330

For peer review only



331 **Table 2: Non-psychiatric hospital admissions (mean, SD) by participant characteristics in**  
 332 **17,939 British people between 1999/00 and 2009**

333

|                                        | Total number with characteristic | Number of admissions    |
|----------------------------------------|----------------------------------|-------------------------|
| Characteristic                         |                                  | Mean (SD)               |
| <b>Past-year GAD</b>                   |                                  |                         |
| Yes                                    | 393                              | 4.0 (6.3) <sup>a</sup>  |
| No                                     | 17546                            | 3.4 (13.0)              |
| <b>Socio-demographics</b>              |                                  |                         |
| <b>Age (years)</b>                     |                                  |                         |
| <50                                    | 2359                             | 1.9 (9.8) <sup>a</sup>  |
| 50-60                                  | 6209                             | 3.0 (16.5)              |
| 60-70                                  | 5733                             | 3.8 (11.2)              |
| 70+                                    | 3638                             | 4.6 (9.6)               |
| <b>Sex</b>                             |                                  |                         |
| Women                                  | 9937                             | 3.1 (14.0) <sup>a</sup> |
| Men                                    | 8002                             | 3.9 (11.3)              |
| <b>Education<sup>‡</sup></b>           |                                  |                         |
| Low                                    | 6106                             | 4.1 (17.1) <sup>a</sup> |
| High                                   | 11833                            | 3.1 (10.1)              |
| <b>Marital status</b>                  |                                  |                         |
| Single                                 | 686                              | 3.0 (8.9) <sup>a</sup>  |
| Married                                | 14538                            | 3.3 (10.9)              |
| Other*                                 | 2715                             | 4.0 (21.0)              |
| <b>Social class</b>                    |                                  |                         |
| Manual                                 | 6836                             | 4.0 (18.3) <sup>a</sup> |
| Non-manual                             | 11103                            | 3.1 (7.8)               |
| <b>Employment</b>                      |                                  |                         |
| Yes                                    | 7712                             | 2.5 (9.1) <sup>a</sup>  |
| No                                     | 10227                            | 4.1 (15.1)              |
| <b>Health status</b>                   |                                  |                         |
| <b>Physical conditions<sup>‡</sup></b> |                                  |                         |
| Yes                                    | 9166                             | 3.9 (10.4) <sup>a</sup> |
| No                                     | 8773                             | 3.0 (15.1)              |
| <b>Disability level</b>                |                                  |                         |
| High <sup>¶</sup>                      | 8900                             | 4.4 (16.5) <sup>a</sup> |
| Low                                    | 9039                             | 2.5 (7.8)               |
| <b>Psychiatric conditions</b>          |                                  |                         |
| <b>Past-year MDD</b>                   |                                  |                         |
| Yes                                    | 934                              | 4.5 (13.6) <sup>a</sup> |
| No                                     | 17005                            | 3.4 (12.9)              |
| <b>Behaviour risk factors</b>          |                                  |                         |
| <b>Physical activity</b>               |                                  |                         |
| Active <sup>‡</sup>                    | 12822                            | 3.2 (13.3) <sup>a</sup> |
| Inactive                               | 5117                             | 4.1 (11.7)              |
| <b>Smoking status</b>                  |                                  |                         |
| Current smoker                         | 1893                             | 4.6 (26.8) <sup>a</sup> |

|                       |      |                         |
|-----------------------|------|-------------------------|
| Former smoker         | 7470 | 3.8 (11.4)              |
| Never smoker          | 8576 | 2.9 (8.6)               |
| <b>Alcohol intake</b> |      |                         |
| High <sup>a</sup>     | 9241 | 3.2 (13.3) <sup>a</sup> |
| Low                   | 8698 | 3.7 (12.5)              |

334

335 † High education: O-level, A-level, degree; low education: refers to no education

336 \* Other: divorced, separated, widowed

337 † Physical conditions: respiratory disease (asthma and bronchitis), allergies and hay fever, stroke, heart attack, cancer, diabetes, thyroid conditions, arthritis

338 † Below the median PCS value of 50.6

339 † Moderately inactive, moderately active, active

340 † 3+ units of alc./week (1 pint beer=2 units, 1 glass wine=1 unit, 1 glass sherry=1 unit, 1 glass spirits=1 unit)

341

342 <sup>a</sup>  $P < 0.001$ 343 <sup>b</sup>  $P < 0.05$ 

344

345

1  
2  
3 346 Participants with GAD had a higher frequency of hospitalization compared to those without  
4  
5 347 GAD. Some of the findings show that frequency of hospitalization was markedly higher  
6  
7 348 among older age groups, men, those with low educational attainment, unemployed  
8  
9 349 participants, those with high levels of disability, and with past-year MDD.

10 350

11 351 Table 3 shows the unadjusted and adjusted incidence rate ratios of hospital admissions by  
12  
13 352 GAD status.

14  
15 353  
16  
17  
18  
19  
20  
21  
22  
23  
24  
25  
26  
27  
28  
29  
30  
31  
32  
33  
34  
35  
36  
37  
38  
39  
40  
41  
42  
43  
44  
45  
46  
47  
48  
49  
50  
51  
52  
53  
54  
55  
56  
57  
58  
59  
60

For peer review only

354 **Table 3: Associations between past-year GAD reported in 1996-2000 and non-psychiatric**  
 355 **hospital admissions in 1999/00-2009 in 17,939 British people over the age of 40**  
 356

| Characteristic                         | IRR and 95% CI    |                   |                   |                   |
|----------------------------------------|-------------------|-------------------|-------------------|-------------------|
|                                        | Crude IRR         | A <sup>1</sup>    | B <sup>2</sup>    | C <sup>3</sup>    |
| <b>Past-year GAD</b>                   |                   |                   |                   |                   |
| Yes                                    | 1.18 (1.02, 1.36) | 1.25 (1.09, 1.43) | 1.10 (0.96, 1.27) | 1.04 (0.90, 1.20) |
| No                                     | 1.00              | 1.00              | 1.00              | 1.00              |
| <b>Socio-demographics</b>              |                   |                   |                   |                   |
| <b>Age</b>                             |                   |                   |                   |                   |
| Per 10 years                           | 1.36 (1.33, 1.40) | 1.19 (1.16, 1.23) | 1.20 (1.17, 1.24) | 1.21 (1.18, 1.25) |
| <b>Sex</b>                             |                   |                   |                   |                   |
| Women                                  | 0.80 (0.76, 0.83) | 0.76 (0.73, 0.79) | 0.76 (0.72, 0.79) | 0.78 (0.74, 0.81) |
| Men                                    | 1.00              | 1.00              | 1.00              | 1.00              |
| <b>Education<sup>‡</sup></b>           |                   |                   |                   |                   |
| Low                                    | 1.30 (1.24, 1.36) | 1.13 (1.08, 1.18) | 1.13 (1.08, 1.19) | 1.11 (1.06, 1.16) |
| High                                   | 1.00              | 1.00              | 1.00              | 1.00              |
| <b>Marital status</b>                  |                   |                   |                   |                   |
| Single                                 | 0.88 (0.79, 0.99) | 0.85 (0.77, 0.95) | 0.85 (0.76, 0.95) | 0.84 (0.76, 0.94) |
| Married                                | 1.00              | 1.00              | 1.00              | 1.00              |
| Other*                                 | 1.21 (1.14, 1.28) | 1.17 (1.11, 1.24) | 1.14 (1.07, 1.21) | 1.09 (1.03, 1.16) |
| <b>Social class</b>                    |                   |                   |                   |                   |
| Manual                                 | 1.29 (1.23, 1.34) | 1.24 (1.19, 1.30) | 1.24 (1.19, 1.30) | 1.21 (1.16, 1.26) |
| Non-manual                             | 1.00              | 1.00              | 1.00              | 1.00              |
| <b>Employment</b>                      |                   |                   |                   |                   |
| Yes                                    | 1.00              | 1.00              | 1.00              | 1.00              |
| No                                     | 1.64 (1.57, 1.71) | 1.18 (1.12, 1.25) | 1.18 (1.12, 1.24) | 1.15 (1.09, 1.21) |
| <b>Health status</b>                   |                   |                   |                   |                   |
| <b>Physical conditions<sup>‡</sup></b> |                   |                   |                   |                   |
| Yes                                    | 1.32 (1.26, 1.37) | 1.18 (1.13, 1.23) | 1.17 (1.12, 1.22) | 1.18 (1.13, 1.23) |
| No                                     | 1.00              | 1.00              | 1.00              | 1.00              |
| <b>Disability level</b>                |                   |                   |                   |                   |
| High <sup>¶</sup>                      | 1.78 (1.71, 1.86) | 1.52 (1.45, 1.59) | 1.51 (1.44, 1.57) | 1.48 (1.42, 1.55) |
| Low                                    | 1.00              | 1.00              | 1.00              | 1.00              |
| <b>Psychiatric conditions</b>          |                   |                   |                   |                   |
| <b>Past-year MDD</b>                   |                   |                   |                   |                   |
| Yes                                    | 1.34 (1.22, 1.48) |                   | 1.34 (1.22, 1.48) | 1.33 (1.21, 1.46) |
| No                                     | 1.00              |                   | 1.00              | 1.00              |
| <b>Lifestyle</b>                       |                   |                   |                   |                   |
| <b>Physical activity</b>               |                   |                   |                   |                   |
| Active <sup>‡</sup>                    | 1.00              |                   |                   | 1.00              |
| Inactive                               | 1.27 (1.21, 1.33) |                   |                   | 1.04 (1.00, 1.09) |
| <b>Smoking status</b>                  |                   |                   |                   |                   |
| Current smoker                         | 1.60 (1.49, 1.72) |                   |                   | 1.51 (1.41, 1.62) |
| Former smoker                          | 1.33 (1.27, 1.39) |                   |                   | 1.13 (1.08, 1.18) |

|                       |                   |                   |
|-----------------------|-------------------|-------------------|
| Never smoker          | 1.00              | 1.00              |
| <b>Alcohol intake</b> |                   |                   |
| High <sup>α</sup>     | 0.88 (0.85, 0.92) | 0.92 (0.88, 0.96) |
| Low                   | 1.00              | 1.00              |

357

358

<sup>1</sup> Model A: adjusted for sociodemographics (age, sex, education, marital status, social class, employment), physical conditions, disability

359

360

<sup>2</sup> Model B: adjusted for sociodemographics, physical conditions, disability, MDD

361

362

<sup>3</sup> Model C: adjusted for sociodemographics, physical conditions, disability, MDD, physical activity, smoking, alcohol

363

364

<sup>‡</sup> High education: O-level, A-level, degree; low education: refers to no education

365

<sup>\*</sup> Other: divorced, separated, widowed

366

<sup>+</sup> Physical conditions: respiratory disease (asthma and bronchitis), allergies and hay fever, stroke, heart attack, cancer, diabetes, thyroid conditions, arthritis

367

368

<sup>¶</sup> Below the median PCS value of 50.6

369

<sup>‡</sup> Moderately inactive, moderately active, active

370

<sup>α</sup> 3+ units of alc./week (1 pint beer=2 units, 1 glass wine=1 unit, 1 glass sherry=1 unit, 1 glass spirits=1 unit)

371

372

1  
2  
3 373 After adjustment for sociodemographic variables, physical conditions, and disability, GAD  
4 374 was associated with a 25% higher incidence rate of hospitalization (IRR=1.25, 95% CI: 1.09,  
5 375 1.43). The incidence rate ratio was somewhat attenuated and became statistically non-  
6 376 significant after further adjustment for MDD (IRR=1.10, 95% CI 0.96, 1.27). The effect  
7 377 estimate approached the null after additional adjustment for behaviour risk factors  
8 378 (IRR=1.04, 95% CI: 0.90, 1.20). Finally, we did multiple imputations for missing data  
9 379 (Appendix II). The effect estimate remained the same when we imputed all covariates  
10 380 except for GAD (IRR: 1.04, 95% CI: 1.02, 1.06). The effect estimate remained virtually  
11 381 unchanged when we imputed all covariates including GAD (IRR: 1.05, 95% CI: 1.03, 1.08).  
12 382  
13 383  
14  
15  
16  
17  
18  
19  
20  
21  
22 384 Next, we assessed whether risk for hospital admissions varied by frequency of GAD lifetime  
23 385 episodes, anxiety episode chronicity, GAD age of onset, and whether the hospitalization risk  
24 386 was higher in those with psychiatric comorbidity (with MDD) (table 4). Results are based on  
25 387 fully-adjusted models.  
26  
27  
28  
29  
30 388

389 **Table 4: Associations between different forms of GAD reported in 1996-2000 and non-**  
 390 **psychiatric hospital admissions in 1999/00-2009 in 17,939 British people ages 40+**  
 391

| Characteristic                         | IRR and 95% CI                 |                                |                                |                                |
|----------------------------------------|--------------------------------|--------------------------------|--------------------------------|--------------------------------|
| <b>GAD type</b>                        |                                |                                |                                |                                |
| <b>Frequent GAD</b>                    |                                |                                |                                |                                |
| Yes <sup>a</sup>                       | 1.07 (0.91, 1.27) <sup>e</sup> |                                |                                |                                |
| No                                     | 1.00                           |                                |                                |                                |
| <b>Chronic GAD</b>                     |                                |                                |                                |                                |
| Yes <sup>b</sup>                       |                                | 1.07 (0.85, 1.35) <sup>e</sup> |                                |                                |
| No                                     |                                | 1.00                           |                                |                                |
| <b>Early age GAD onset</b>             |                                |                                |                                |                                |
| Yes <sup>c</sup>                       |                                |                                | 1.16 (0.95, 1.41) <sup>e</sup> |                                |
| No                                     |                                |                                | 1.00                           |                                |
| <b>Comorbid GAD</b>                    |                                |                                |                                |                                |
| Yes <sup>d</sup>                       |                                |                                |                                | 1.23 (1.02, 1.49) <sup>e</sup> |
| No                                     |                                |                                |                                | 1.00                           |
| <b>Socio-demographics</b>              |                                |                                |                                |                                |
| <b>Age</b>                             |                                |                                |                                |                                |
| Per 10 years                           | 1.22 (1.18, 1.25)              | 1.21 (1.18, 1.25)              | 1.22 (1.18, 1.25)              | 1.21 (1.17, 1.25)              |
| <b>Sex</b>                             |                                |                                |                                |                                |
| Women                                  | 0.78 (0.74, 0.81)              | 0.78 (0.74, 0.81)              | 0.78 (0.74, 0.81)              | 0.78 (0.75, 0.82)              |
| Men                                    | 1.00                           | 1.00                           | 1.00                           | 1.00                           |
| <b>Education<sup>‡</sup></b>           |                                |                                |                                |                                |
| Low                                    | 1.10 (1.06, 1.16)              | 1.11 (1.06, 1.16)              | 1.10 (1.06, 1.16)              | 1.12 (1.07, 1.18)              |
| High                                   | 1.00                           | 1.00                           | 1.00                           | 1.00                           |
| <b>Marital status</b>                  |                                |                                |                                |                                |
| Single                                 | 0.84 (0.76, 0.94)              | 0.84 (0.76, 0.94)              | 0.84 (0.76, 0.94)              | 0.83 (0.74, 0.93)              |
| Married                                | 1.00                           | 1.00                           | 1.00                           | 1.00                           |
| Other <sup>*</sup>                     | 1.10 (1.03, 1.16)              | 1.09 (1.03, 1.16)              | 1.09 (1.03, 1.16)              | 1.03 (0.97, 1.10)              |
| <b>Social class</b>                    |                                |                                |                                |                                |
| Manual                                 | 1.21 (1.16, 1.26)              | 1.21 (1.16, 1.26)              | 1.21 (1.16, 1.26)              | 1.21 (1.16, 1.27)              |
| Non-manual                             | 1.00                           | 1.00                           | 1.00                           | 1.00                           |
| <b>Employment</b>                      |                                |                                |                                |                                |
| Yes                                    | 1.00                           | 1.00                           | 1.00                           | 1.00                           |
| No                                     | 1.15 (1.09, 1.21)              | 1.15 (1.09, 1.21)              | 1.15 (1.09, 1.21)              | 1.17 (1.11, 1.24)              |
| <b>Health status</b>                   |                                |                                |                                |                                |
| <b>Physical conditions<sup>+</sup></b> |                                |                                |                                |                                |
| Yes                                    | 1.17 (1.13, 1.23)              | 1.17 (1.13, 1.23)              | 1.17 (1.13, 1.23)              | 1.17 (1.12, 1.22)              |
| No                                     | 1.00                           | 1.00                           | 1.00                           | 1.00                           |
| <b>Disability level</b>                |                                |                                |                                |                                |
| High <sup>¶</sup>                      | 1.48 (1.42, 1.55)              | 1.48 (1.42, 1.55)              | 1.48 (1.42, 1.55)              | 1.48 (1.42, 1.55)              |
| Low                                    | 1.00                           | 1.00                           | 1.00                           | 1.00                           |
| <b>Psychiatric conditions</b>          |                                |                                |                                |                                |

|                          |                   |                   |                   |                   |
|--------------------------|-------------------|-------------------|-------------------|-------------------|
| <b>Past-year MDD</b>     |                   |                   |                   |                   |
| Yes                      | 1.32 (1.20, 1.45) | 1.33 (1.22, 1.46) | 1.33 (1.21, 1.46) | --                |
| No                       | 1.00              | 1.00              | 1.00              |                   |
| <b>Lifestyle</b>         |                   |                   |                   |                   |
| <b>Physical activity</b> |                   |                   |                   |                   |
| Active <sup>‡</sup>      | 1.00              | 1.00              | 1.00              | 1.02 (0.97, 1.07) |
| Inactive                 | 1.04 (1.00, 1.09) | 1.04 (1.00, 1.09) | 1.04 (1.00, 1.09) | 1.00              |
| <b>Smoking status</b>    |                   |                   |                   |                   |
| Current smoker           | 1.51 (1.41, 1.62) | 1.51 (1.41, 1.62) | 1.51 (1.41, 1.62) | 1.56 (1.45, 1.68) |
| Former smoker            | 1.13 (1.08, 1.18) | 1.13 (1.08, 1.18) | 1.13 (1.08, 1.18) | 1.14 (1.09, 1.19) |
| Never smoker             | 1.00              | 1.00              | 1.00              | 1.00              |
| <b>Alcohol intake</b>    |                   |                   |                   |                   |
| High <sup>¶</sup>        | 0.92 (0.88, 0.96) | 0.92 (0.88, 0.96) | 0.92 (0.88, 0.96) | 0.93 (0.89, 0.98) |
| Low                      | 1.00              | 1.00              | 1.00              | 1.00              |

392

393

<sup>a</sup> 3+ episodes of lifetime GAD

394

<sup>b</sup> GAD episodes lasted at least 6 months

395

<sup>c</sup> GAD developed before 30 years of age

396

<sup>d</sup> GAD-MDD comorbidity

397

<sup>e</sup> Adjusted for sociodemographics, physical conditions, disability, MDD, physical activity, smoking, alcohol

398

399

<sup>‡</sup> High education: O-level, A-level, degree; low education: refers to no education

400

<sup>\*</sup> Other: divorced, separated, widowed

401

<sup>†</sup> Physical conditions: respiratory disease (asthma and bronchitis), allergies and hay fever, stroke, heart attack, cancer, diabetes, thyroid conditions, arthritis

402

403

<sup>¶</sup> Below the median PCS value of 50.6

404

<sup>‡</sup> Moderately inactive, moderately active, active

405

<sup>¶</sup> 3+ units of alc./week (1 pint beer=2 units, 1 glass wine=1 unit, 1 glass sherry=1 unit, 1 glass spirits=1 unit)

406

406



1  
2  
3 407 People with more than 3 lifetime episodes had a somewhat higher risk of hospitalization  
4 408 (IRR=1.07, 95% CI: 0.91, 1.27). Those whose episodes lasted, on average, 6 months or  
5 409 longer also had a slight increased risk for admissions compared to those with shorter  
6 410 episodes (IRR=1.07, 95% CI: 0.85, 1.35). People who developed GAD before 30 years of age  
7 411 were 16% more likely to be admitted to the hospital than those who developed it later in  
8 412 life (IRR=1.16, 95% CI: 0.95, 1.41). Finally, we determined whether GAD comorbid with  
9 413 MDD is associated with non-psychiatric hospital admissions. Results showed that people  
10 414 with GAD-MDD comorbidity had a 23% higher chance of being admitted to hospital than  
11 415 people without comorbidity – this association was statistically significant (IRR: 1.23 ,95% CI:  
12 416 1.02, 1.49).  
13 417  
14  
15  
16  
17  
18  
19  
20  
21  
22  
23  
24  
25  
26  
27  
28  
29  
30  
31  
32  
33  
34  
35  
36  
37  
38  
39  
40  
41  
42  
43  
44  
45  
46  
47  
48  
49  
50  
51  
52  
53  
54  
55  
56  
57  
58  
59  
60

## DISCUSSION

418  
419  
420 This is the first study to assess the association between GAD and hospital service use in a  
421 population-based cohort. This longitudinal study showed that having an episode of GAD in  
422 the past year was not independently associated with hospital admissions during the  
423 subsequent ten years. However, those who developed GAD at an early age (before 30) and,  
424 in particular, those with MDD comorbidity were at an increased risk of being admitted to  
425 hospital than those with a later onset and without MDD comorbidity, respectively. The  
426 association between GAD-MDD comorbidity and non-psychiatric hospital admissions was  
427 statistically significant.

428  
429 People with past-year GAD were more likely to have medical conditions; nonetheless,  
430 including these covariates in the model left the association between past-year GAD and  
431 hospital admissions statistically significant. It was only when MDD was introduced in the  
432 model as a potential confounder that any remaining association with hospital service  
433 utilization was explained away.

434

### Strengths and limitations

436

437 There are several strengths associated with our study. We had a large, population-based  
438 sample of middle- and older-aged adults and adequately adjusted for a range of possible  
439 confounders. We used a structured questionnaire to assess past-year GAD according to  
440 DSM-IV criteria, used large administrative health databases to examine hospital service use  
441 (avoiding the self-reporting bias found in questionnaire studies), and participants were  
442 followed for a long time. We had a large list of self-reported physician diagnoses of chronic  
443 diseases that we used to ascertain medical histories. Despite this, the residual effect of  
444 diseases not captured by our study, but that are associated with GAD may be present. Past  
445 illness may have been underreported, which may have introduced measurement error and  
446 further attenuated effect estimates towards the null. A negligible proportion of participants  
447 may have obtained care at private facilities, which might have led to non-differential  
448 misclassification. The databases used in this study also did not capture admissions to

1  
2  
3 449 hospitals outside the UK. However, migration in the EPIC-Norfolk cohort is minimal and  
4  
5 450 does not present a problem.

6 451  
7  
8 452 We may have overadjusted our models with the inclusion of self-evaluated impairment, as  
9  
10 453 this may be part of the expression of psychiatric illness. This can lead to attenuation of  
11  
12 454 effect estimates. If participants chose not to answer certain questions in the HLEQ, this  
13  
14 455 contributed to missing data; however, to avoid biasing the findings, we retained participants  
15  
16 456 for whom we had complete data on all covariates. Non-participation in our study also may  
17  
18 457 have led to non-differential misclassification and further attenuation of effect estimates.

19 458  
20  
21 459 Another limitation is that we did not have data on primary care service use. Merging  
22  
23 460 population cohorts, such as ours, with primary care service administrative databases and  
24  
25 461 hospitalization databases would have provided a more complete picture of the burden of  
26  
27 462 GAD on the health care system.

28 463  
29  
30 464 This study was conducted on people ages 40 years and older and may not be generalizable  
31  
32 465 to younger age groups. We suspect that the strength of the association between GAD-MDD  
33  
34 466 comorbidity and non-psychiatric hospital admissions is weaker for younger populations who  
35  
36 467 are typically healthier than older people. Although young people have a high burden of  
37  
38 468 mental health problems[40, 44], they (especially adolescents) are less likely to have non-  
39  
40 469 psychiatric hospitalizations than older people[45]. It could take many years until the effects  
41  
42 470 of anxiety comorbid with depression accumulate and manifest as poor physical health, thus  
43  
44 471 translating into higher use of non-psychiatric hospital services. As such, we would expect  
45  
46 472 the strength of the association between GAD-MDD comorbidity and hospitalizations to be  
47  
48 473 weaker in young people, however, future studies should investigate this.

49 474  
50  
51 475 Participants were required to complete detailed dietary and lifestyle questionnaires and  
52  
53 476 undergo periodic health assessments. Because those who participated in EPIC-Norfolk were  
54  
55 477 more affluent and healthier than individuals living in other parts of England, our results may  
56  
57 478 not generalize to people living in extremely deprived areas.

58  
59  
60 479

1  
2  
3 480 Finally, there was missing data in this study. When we conducted multiple imputations for  
4 481 missing data, the effect estimate of our main analysis remained unchanged.

5  
6 482

### 7 8 483 **Comparison with other studies**

9  
10 484

11 485 Most of the studies assessing the link between psychiatric disorders and non-psychiatric  
12 486 health service utilization have focused on depression and, to a lesser extent, panic disorder  
13 487 and PTSD, while other anxiety disorders have been significantly underresearched. Most of  
14 488 the studies on depression as a stand alone measure have shown an association with health  
15 489 service use in both clinical and community samples.[46] There are substantially fewer  
16 490 studies on anxiety, and a number of these have shown positive associations with health  
17 491 service use. A US study[47] that recruited patients from an outpatient clinic showed that  
18 492 anxiety disorders were linked to higher utilization of primary care services compared to  
19 493 depressive or addictive disorders. Patients, however, were recruited from an outpatient  
20 494 clinic located in a predominantly rural area, which might have affected generalizability.  
21 495 Another study showed anxiety disorders to be associated with a higher number of  
22 496 consultations in general medical, emergency and specialty settings, such as cardiology and  
23 497 dermatology.[48] In this study, people were sampled from an anxiety clinic, thereby leading  
24 498 to possible selection bias. Other studies showed PTSD and GAD to be associated with health  
25 499 care use, however, this research was based on highly-select samples that have limited  
26 500 generalizability.[26, 28, 49, 50] In contrast to the literature, a major strength of our study  
27 501 was that it was population-based. There is also a lack of research assessing whether the  
28 502 severity of anxiety or different forms of the disorder contribute to even higher health  
29 503 service use rates (early onset forms and comorbid cases are typically the most severe,  
30 504 hardest to treat and with the poorest prognosis [9]).

31  
32  
33  
34  
35  
36  
37  
38  
39  
40  
41  
42  
43  
44  
45  
46  
47 505

### 48 506 **Mechanisms**

49  
50  
51 507

52 508 A more severe course of GAD can lead to higher rates of health services because of  
53 509 unhealthy behaviours, such as smoking and alcohol (which we controlled for in our  
54 510 analyses). It could also be that a more severe form of anxiety, such as GAD-MDD  
55 511 comorbidity is associated with poorer underlying health, which then leads to higher health

56  
57  
58  
59  
60

1  
2  
3 512 service use rates. Although we controlled for several chronic diseases, we might have  
4 513 missed some conditions that are associated with GAD-MDD comorbidity and  
5 514 hospitalizations. A third explanation for higher health service use in those with comorbid  
6 515 anxiety and depression could relate to inflammatory pathways. If clinically apparent signs of  
7 516 disease have not yet developed in those with psychiatric comorbidity or are at an early,  
8 517 undetectable stage, it will not be possible to measure these factors and adjust for them in  
9 518 analyses.

10  
11  
12  
13  
14  
15 519

## 16 17 520 **Implications**

18  
19 521

20  
21 522 GAD is a debilitating and impairing condition.[9] The evidence base on its association with  
22 523 health services is small and confined to clinical settings with the potential for self-selection  
23 524 bias. Our study overcomes many limitations of previous studies, and clarifies that GAD  
24 525 measured at a single point in time (ex. in the past year) is not associated with health service  
25 526 use. Instead, it shows that cases with early age of GAD onset and especially those that are  
26 527 comorbid with depression can lead to increased use of hospital services, after controlling for  
27 528 a range of important confounders. In this study, GAD-MDD comorbidity was associated with  
28 529 a statistically significantly increased risk of hospital admissions.

29  
30  
31  
32  
33  
34 530

35  
36 531 Population-based research on anxiety is lacking, and thus far, no studies have assessed the  
37 532 association between GAD and non-psychiatric hospitalization. Clinicians should consider  
38 533 that it is not just the diagnosis of the disorder at one point in time that is predictive of  
39 534 deleterious health outcomes; its long-term course and different forms of the disorder may  
40 535 also be important. GAD has a waxing and waning course throughout a patient's life, and  
41 536 many of those affected experience relapse after psychiatric treatment or develop  
42 537 psychiatric comorbidities.

43  
44  
45  
46  
47  
48 538

49  
50 539 Our findings are important for clinicians and policy-makers. Large numbers of people are  
51 540 affected by anxiety-depression comorbidity and a number of individuals develop anxiety  
52 541 early in life [9]. As such, clinicians should consider more widespread screening for mental  
53 542 health problems and if appropriate, the examination of any underlying health conditions  
54 543 that may require treatment in order to prevent future hospital admissions. Policy-makers

1  
2  
3 544 should also consider rolling out more widespread anxiety prevention and screening  
4 545 programmes.

5 546 Future research, however needs to examine the reasons for the increased non-psychiatric  
6 547 hospital service use in those with GAD-MDD comorbidity (this can provide additional insight  
7 548 into clinical recommendations). To provide a better understanding of the links between  
8 549 mental and physical health, the bidirectional links between anxiety and physical health  
9 550 problems should also be examined. Finally, future research should merge a population-  
10 551 based cohort with primary and secondary care administrative health databases to provide a  
11 552 more complete picture of the burden of different forms of anxiety on the health care  
12 553 system.

13 554  
14 555 Finally, while our association between early age of GAD onset and hospital admissions did  
15 556 not reach statistical significance, the effect estimate does suggest that people who develop  
16 557 anxiety early in life have a 16% higher chance of being admitted to hospital than those with  
17 558 late-onset cases. Future research should replicate our study with a larger number of anxiety  
18 559 cases by combining common anxiety disorders into one group.[22]

19 560

## 20 561 **Conclusion**

21 562

22 563 People with an earlier age of onset for GAD and especially those with comorbid MDD had a  
23 564 higher risk for hospital admissions over 9 years between 1996-1999/00 and 2009 in the  
24 565 European Prospective Investigation of Cancer in Norfolk study.

1  
2  
3 566 Acknowledgements: OR received a PhD studentship from the National Institute for Health  
4 567 Research.

5  
6 568

7  
8 569 Competing interest: All authors have completed the ICMJE uniform disclosure form at  
9 570 [www.icmje.org/coi\\_disclosure.pdf](http://www.icmje.org/coi_disclosure.pdf) and declare: no support from any organisation for the  
10 571 submitted work; no financial relationships with any organizations that might have an  
11 572 interest in the submitted work in the previous three years; no other relationships or  
12 573 activities that could appear to have influenced the submitted work.

13  
14 574

15 575 Funding: This work was supported by the Medical Research Council UK (grant number  
16 576 SP2024-0201 and SP2024-0204) and Cancer Research UK (grant number G9502233).

17  
18 577

19 578 Author contributions: OR (corresponding author) had the idea for and conducted the  
20 579 analysis, and wrote the article. CB critically reviewed drafts of the manuscript, KK edited  
21 580 versions of the paper; PS and NW provided feedback into the analysis. OR, CB, KK, LL, PS,  
22 581 and NW contributed to the interpretation of data for the work, agreed to be accountable for  
23 582 all aspects of the work, gave final approval of the version to be published, and made  
24 583 substantial contributions to the analysis and interpretation of data. OR, CB, KK, LL, PS, and  
25 584 NW have seen and approved the final version. OR, CB, KK, LL, PS, and NW had full access to  
26 585 all the data in the study and take responsibility for the integrity of the data and the accuracy  
27 586 of the data analysis. OR acts as guarantor of the study.

28  
29 587

30 588 Transparency declaration: OR affirms that the manuscript is an honest, accurate, and  
31 589 transparent account of the study being reported; that no important aspects of the study  
32 590 have been omitted; and that any discrepancies from the study as planned have been  
33 591 explained.

34  
35 592

36 593 Role of study sponsors and statement of independence: The funding sources had no role in  
37 594 the design and conduct of the study; collection, management, analysis, and interpretation of  
38 595 the data; and preparation, review, or approval of the manuscript.

39  
40 596

1  
2  
3 597 Ethical approval: The study has ethics committee approval from Norfolk Ethics Committee  
4 598 (Rec Ref: 98CN01) and all participants gave informed consent.

5 599 Data sharing: No additional data available. Original dataset requests should be sent to the  
6 600 corresponding author. Please contact O Remes at [or260@medschl.cam.ac.uk](mailto:or260@medschl.cam.ac.uk) for questions  
7 601 about the statistical code.

8 602

9 603 Copyright: "The Corresponding Author has the right to grant on behalf of all authors and  
10 604 does grant on behalf of all authors, a worldwide licence to the Publishers and its licensees in  
11 605 perpetuity, in all forms, formats and media (whether known now or created in the future),  
12 606 to i) publish, reproduce, distribute, display and store the Contribution, ii) translate the  
13 607 Contribution into other languages, create adaptations, reprints, include within collections  
14 608 and create summaries, extracts and/or, abstracts of the Contribution, iii) create any other  
15 609 derivative work(s) based on the Contribution, iv) to exploit all subsidiary rights in the  
16 610 Contribution, v) the inclusion of electronic links from the Contribution to third party  
17 611 material where-ever it may be located; and, vi) licence any third party to do any or all of the  
18 612 above."

19 613  
20  
21  
22  
23  
24  
25  
26  
27  
28  
29  
30  
31  
32  
33  
34  
35  
36  
37  
38  
39  
40  
41  
42  
43  
44  
45  
46  
47  
48  
49  
50  
51  
52  
53  
54  
55  
56  
57  
58  
59  
60



## 614 REFERENCES

615

- 616 1. American Psychiatric Association. (1994). *Diagnostic and Statistical Manual of*  
617 *Mental Disorders* (4<sup>th</sup> edn). Washington, DC: APA.
- 618 2. Whiteford HA, Degenhardt, Rehm J, et al. Global burden of disease attributable to  
619 mental and substance use disorders: findings from the global burden of disease  
620 study 2010. *Lancet* 2013;13:1575-86 doi: [http://dx.doi.org/10.1016/S0140-](http://dx.doi.org/10.1016/S0140-6736(13)61611-6)  
621 [6736\(13\)61611-6](http://dx.doi.org/10.1016/S0140-6736(13)61611-6).
- 622 3. Greenberg PE, Sisitsky T, Kessler RC, et al. The economic burden of anxiety disorders  
623 in the 1990s. *J Clin Psychiatry* 1999;60:427-35.
- 624 4. Kroenke K, Spitzer RL, Williams JB, et al. Anxiety disorders in primary care:  
625 prevalence, impairment, comorbidity, and detection. *Ann Intern Med* 2007;146:317-  
626 25 doi: [10.7326/0003-4819-146-5-200703060-00004](https://doi.org/10.7326/0003-4819-146-5-200703060-00004).
- 627 5. Comer JS, Blanco C, Hasin DS, et al. Health-related quality of life across the anxiety  
628 disorders. *J Clin Psychiatry* 2011;72:43–50 doi: [10.4088/JCP.09m05094blu](https://doi.org/10.4088/JCP.09m05094blu) [published  
629 Online First 24 August 2010].
- 630 6. Tyrer P, Baldwin D. Generalised anxiety disorder. *Lancet* 2006;16:2156–66 doi:  
631 [http://dx.doi.org/10.1016/S0140-6736\(06\)69865-6](http://dx.doi.org/10.1016/S0140-6736(06)69865-6).
- 632 7. Hoge E, Ivkovic A, Fricchione G. Generalized anxiety disorder: diagnosis and  
633 treatment. *BMJ* 2012;345:e7500 doi: <https://doi.org/10.1136/bmj.e7500>.
- 634 8. Revicki DA, Travers K, Wyrwich KW. Humanistic and economic burden of generalized  
635 anxiety disorder in North America and Europe. *J Affect Disord* 2012;140:103–12 doi:  
636 [10.1016/j.jad.2011.11.014](https://doi.org/10.1016/j.jad.2011.11.014) [published Online First 9 December 2011].
- 637 9. Simpson HB, Neria Y, Lewis-Fernandez R, et al. Anxiety disorders. Theory, research  
638 and clinical perspectives. New York, US: Cambridge University Press 2010.
- 639 10. Combs H, Markman J. Anxiety disorders in primary care. *Med Clin North Am*  
640 2014;98:1007-23 doi: [10.1016/j.mcna.2014.06.003](https://doi.org/10.1016/j.mcna.2014.06.003) [published Online First 11 July  
641 2014].
- 642 11. Buszewicz MJ, Chew-Graham C. Improving the detection and management of anxiety  
643 disorders in primary care. *Br J Gen Pract* 2011;61:489-490 doi:  
644 [10.3399/bjgp11X588259](https://doi.org/10.3399/bjgp11X588259).

- 1  
2  
3 645 12. Wittchen H-U, Muhlig S, Beesdo K. Mental disorders in primary care. *Dialogues Clin*  
4 646 *Neurosci* 2003;5:115-128.
- 5  
6 647 13. Schoepf D, Heun R. Anxiety disorders and physical comorbidity: increased prevalence  
7 648 but reduced relevance of specific risk factors for hospital-based mortality during a  
8 649 12.5-year observation period in general hospital admissions. *Eur Arch Psychiatry Clin*  
9 650 *Neurosci* 2015;265:387-98 doi: 10.1007/s00406-014-0566-9 [published Online First 4  
10 651 December 2014].
- 11  
12 652 14. Player MS, Peterson LE. Anxiety disorders, hypertension, and cardiovascular risk: a  
13 653 review. *Int J Psychiatry Med* 2011;41:365-377 doi: <https://doi.org/10.2190/PM.41.4.f>  
14 654 [published Online First 26 October 2011].
- 15  
16 655 15. de Waal MW, Arnold IA, Eekhof JA, van Hemert AM. Somatoform disorders in  
17 656 general practice: prevalence, functional impairment and comorbidity with anxiety  
18 657 and depressive disorders. *Br J Psychiatry* 2004;184:470-6 doi: 10.1192/bjp.184.6.470  
19 658 [published Online First 1 June 2004].
- 20  
21 659 16. Shen CC, Hu YW, Hu LY, et al. The risk of cancer in patients with generalized anxiety  
22 660 disorder: a nationwide population-based study. *PloS One* 2013;e57399 doi:  
23 661 10.1371/journal.pone.0057399 [published Online First 27 February 2013].
- 24  
25 662 17. Janszky I, Ahnve S, Lundberg I, Hemmingsson T. Early-onset depression, anxiety, and  
26 663 risk of subsequent coronary heart disease: 37-year follow-up of 49,321 young  
27 664 Swedish men. *J Am Coll Cardiol* 2010;56:31-37. doi:  
28 665 <https://doi.org/10.1016/j.jacc.2010.03.033> [published Online First 22 June 2010].
- 29  
30 666 18. Gale CR, Batty GD, Osborn DP, et al. Mental disorders across the adult life course and  
31 667 future coronary heart disease: evidence for general susceptibility. *Circulation*  
32 668 2014;129:186-93 doi: 10.1161/CIRCULATIONAHA [published Online First 4 November  
33 669 2013].
- 34  
35 670 19. Carter RM, Wittchen HU, Pfister H, Kessler RC. One-year prevalence of subthreshold  
36 671 and threshold DSM-IV generalized anxiety disorder in a nationally representative  
37 672 sample. *Depress Anxiety* 2001;13:78-88.
- 38  
39 673 20. Lamers F, van Oppen P, Comijs HC, et al. Comorbidity patterns of anxiety and  
40 674 depressive disorders in a large cohort study: the Netherlands Study of Depression  
41 675 and Anxiety (NESDA). *J Clin Psychiatry* 2011;72:341-8 doi: 10.4088/JCP.10m06176blu  
42 676 [published Online First 25 January 2011].

- 1  
2  
3 677 21. Johansson R, Carlbring P, Heedman A, Paxling B, Andersson G. Depression, anxiety  
4 678 and their comorbidity in the Swedish general population: point prevalence and the  
5 679 effect on health-related quality of life. *Peer J* 2013;1:e98 doi: 10.7717/peerj.98  
6 680 [published Online First 9 July 2013].  
7  
8  
9 681 22. Hamalainen J, Isometsa E, Sihvo S, Pirkola S, Kiviruusu O. Use of health services for  
10 682 major depressive and anxiety disorders in Finland. *Depress Anxiety* 2008;25:27-37  
11 683 doi: 10.1002/da.20256 [published Online First 19 January 2007].  
12  
13 684 23. Maj M. 'Psychiatric comorbidity': an artefact of current diagnostic systems. *Br J*  
14 685 *Psychiatry* 2005;186:182-84 doi: 10.1192/bjp.186.3.182 [published Online First 28  
15 686 February 2005].  
16  
17 687 24. Stein MB. Public health perspectives on generalized anxiety disorder. *J Clin*  
18 688 *Psychiatry* 2004;65:3-7.  
19  
20 689 25. Nutt D, Argyropoulos S, Hood S, et al. Generalized anxiety disorder: a comorbid  
21 690 disease. *Eur Neuropsychopharmacol* 2006;16:S109-18 doi:  
22 691 10.1016/j.euroneuro.2006.04.003 [published Online First 5 June 2006].  
23  
24 692 26. Porensky EK, Dew MA, Karp JF, et al. The burden of late-life generalized anxiety  
25 693 disorder: effects on disability, health-related quality of life, and healthcare  
26 694 utilization. *Am J Geriatr Psychiatry* 2009;17:473-82 [published Online First 30 July  
27 695 2012].  
28  
29 696 27. Munk-Jorgensen P, Allgulander C, Dahl AA, et al. Prevalence of generalized anxiety  
30 697 disorder in general practice in Denmark, Finland, Norway, and Sweden. *Psychiatr*  
31 698 *Serv* 2006;57(17):1738-44 doi: 10.1176/ps.2006.57.12.1738 [published Online First 28  
32 699 February 2005].  
33  
34 700 **28.** Belanger L, Ladouceur R, Morin CM. Generalized anxiety disorder and health care  
35 701 use. *Can Fam Physician* 2005;51:1362-3.  
36  
37 702 29. Wittchen HU, Kessler RC, Beesdo K, et al. Generalized anxiety and depression in  
38 703 primary care: prevalence, recognition, and management. *J Clin Psychiatry*  
39 704 2002;63:24.  
40  
41 705 30. Day N, Oakes S, Luben R, et al. EPIC-Norfolk: study design and characteristics of the  
42 706 cohort. European Prospective Investigation of Cancer. *Br J Cancer* 1999;80:95-103.  
43  
44 707 31. Hayat SA, Luben R, Keevil VL, et al. Cohort profile: a prospective cohort study of  
45 708 objective physical and cognitive capability and visual health in an ageing population  
46  
47  
48  
49  
50  
51  
52  
53  
54  
55  
56  
57  
58  
59  
60

- 1  
2  
3 709 of men and women in Norfolk (EPIC-Norfolk 3). *Int J Epidemiol* 2014;43:1063-72 doi:  
4 710 10.1093/ije/dyt086 [published Online First 14 June 2013].  
5  
6 711 32. Surtees P, Wainwright N, Khaw K, et al. Functional health status, chronic medical  
7 712 conditions and disorders of mood. *Br J Psychiatry* 2003;183:299-303 doi:  
8 713 10.1192/bjp.183.4.299 [published Online First 30 September 2003].  
9  
10 714 33. Leng Y, Wainwright NWJ, Cappuccio FP, et al. Daytime napping and the risk of all-  
11 715 cause and cause-specific mortality: a 13-year follow-up of a British population. *Am J*  
12 716 *Epidemiol* 2014;179:1115-1124 doi: <https://doi.org/10.1093/aje/kwu036> [published  
13 717 Online First 30 March 2014].  
14  
15 718 34. Leng Y, Wainwright NWJ, Cappuccio FP, et al. Self-reported sleep patterns in a British  
16 719 population cohort. *Sleep Med* 2014;15:295-302 doi: 10.1016/j.sleep.2013.10.015.  
17  
18 720 35. Leng Y, Wainwright NW, Cappuccio FP, et al. Daytime napping and increased risk of  
19 721 incident respiratory diseases: symptom, marker, or risk factor? *Sleep Med*  
20 722 2016;23:12-15 doi: 10.1016/j.sleep.2016.06.012 [published Online First 12 July  
21 723 2016].  
22  
23 724 36. Shohaimi S, Luben R, Wareham N, et al. Residential area deprivation predicts  
24 725 smoking habit independently of individual educational level and occupational social  
25 726 class. A cross sectional study in the Norfolk cohort of the European Prospective  
26 727 Investigation into Cancer (EPIC-Norfolk). *J Epidemiol Community Health* 2003;57:270-  
27 728 276 doi: 10.1136/jech.57.4.270.  
28  
29 729 37. Myint PK, Surtees PG, Wainwright NW, et al. Physical health-related quality of life  
30 730 predicts stroke in the EPIC-Norfolk. *Neurology* 2007;69:2243-8 doi:  
31 731 10.1212/01.wnl.0000296010.21252.78.  
32  
33 732 38. Elias P, Halstead K, Prandy K. CASOC: Computer-assisted standard occupational  
34 733 coding. London, England: HMSO 1993.  
35  
36 734 39. Surtees PG, Wainwright NWJ, Brayne C. Psychosocial aetiology of chronic disease: a  
37 735 pragmatic approach to the assessment of lifetime affective morbidity in an EPIC  
38 736 component study. *J Epidemiol Community Health* 2000;54:114-122 doi:  
39 737 10.1136/jech.54.2.114.  
40  
41 738 40. Remes O, Brayne C, Van der Linde R, et al. A systematic review of reviews on the  
42 739 prevalence of anxiety disorders in adult populations. *Brain Behav* 2016;6:e00497 doi:  
43 740 10.1002/brb3.497 [published Online First 5 June 2016].  
44  
45  
46  
47  
48  
49  
50  
51  
52  
53  
54  
55  
56  
57  
58  
59  
60

- 1  
2  
3 741 41. Ware JE, Snow K, Kosinski M, et al. New England Medical Center Hospital. Health  
4 742 Institute. SF-36 Health Survey: Manual and Interpretation Guide. The Health  
5 743 Institute; Boston, MA: New England Medical Center 1993.
- 6  
7  
8 744 42. Lakshman R, McConville A, How S, et al. Association between area level socio-  
9 745 economic deprivation and a cluster of behavioural risk factors: Cross sectional,  
10 746 population based study. *J Public Health (Oxf)* 2011;33:234-245. doi:  
11 747 10.1093/pubmed/fdq072 [published Online First 29 September 2010].
- 12  
13  
14 748 43. Vetter S, Endrass J, Schweizer I, et al. The effects of economic deprivation on  
15 749 psychological well-being among the working population of Switzerland. *BMC Public*  
16 750 *Health* 2006;6:223. doi: 10.1186/1471-2458-6-223 [published Online First 4  
17 751 September 2006].
- 18  
19  
20 752 44. NHS Digital. Adult Psychiatric Morbidity survey.  
21 753 <http://content.digital.nhs.uk/catalogue/PUB21748> (accessed 29 September 2016).
- 22  
23  
24 754 45. NHS. Hospital Episode Statistics. <http://content.digital.nhs.uk/hes> (accessed 10  
25 755 September 2017)
- 26  
27  
28 756 46. Luppá M, Sikorski C, Motzek T, et al. Health service utilization and costs of depressive  
29 757 symptoms in late life – a systematic review. *Curr Pharm Des* 2012;18:5936-57.
- 30  
31  
32 758 47. Ford JD, Trestman RL, Steinberg K, et al. Prospective association of anxiety,  
33 759 depressive, and addictive disorders with high utilization of primary, specialty and  
34 760 emergency medical care. *Soc Sci Med* 2004;58:2145-8 doi:  
35 761 10.1016/j.socscimed.2003.08.017 [published Online First 25 September 2003].
- 36  
37  
38 762 48. Deacon B, Lickel J, Abramowitz JS. Medical utilization across the anxiety disorders. *J*  
39 763 *Anxiety Disord* 2008;22:344-50 doi: 10.1016/j.janxdis.2007.03.004 [published Online  
40 764 First 12 March 2007].
- 41  
42  
43 765 49. Klassen BJ, Porcerelli JH, Markova T. The effects of PTSD symptoms on health care  
44 766 resource utilization in a low-income, urban primary care setting. *J Trauma Stress*  
45 767 2013;26:636-9 doi: 10.1002/jts.21838 [published Online First 12 September 2013].
- 46  
47  
48 768 50. Lehavot K, Der-Martirosian C, Simpson TL, et al. The role of military social support in  
49 769 understanding the relationship between PTSD, physical health, and healthcare  
50 770 utilization in women veterans. *J Trauma Stress*. 2013;26:772–5 doi:  
51 771 10.1002/jts.21859 [published Online First 6 November 2013].  
52 772

1  
2  
3 773 **Figure 1 – Flowchart of EPIC-Norfolk cohort**

4 774 This is a flowchart showing the number of participants at each study stage: the number  
5  
6 775 approached to participate in the EPIC-Norfolk study, the number enrolled at baseline, and  
7  
8 776 with complete data on all covariates. The EPIC-Norfolk study consists of middle-aged and  
9  
10 777 older British people.

11 778  
12 779  
13 780  
14 781  
15 782  
16 783  
17  
18  
19  
20  
21  
22  
23  
24  
25  
26  
27  
28  
29  
30  
31  
32  
33  
34  
35  
36  
37  
38  
39  
40  
41  
42  
43  
44  
45  
46  
47  
48  
49  
50  
51  
52  
53  
54  
55  
56  
57  
58  
59  
60

For peer review only

Figure 1 - Flowchart of EPIC-Norfolk cohort

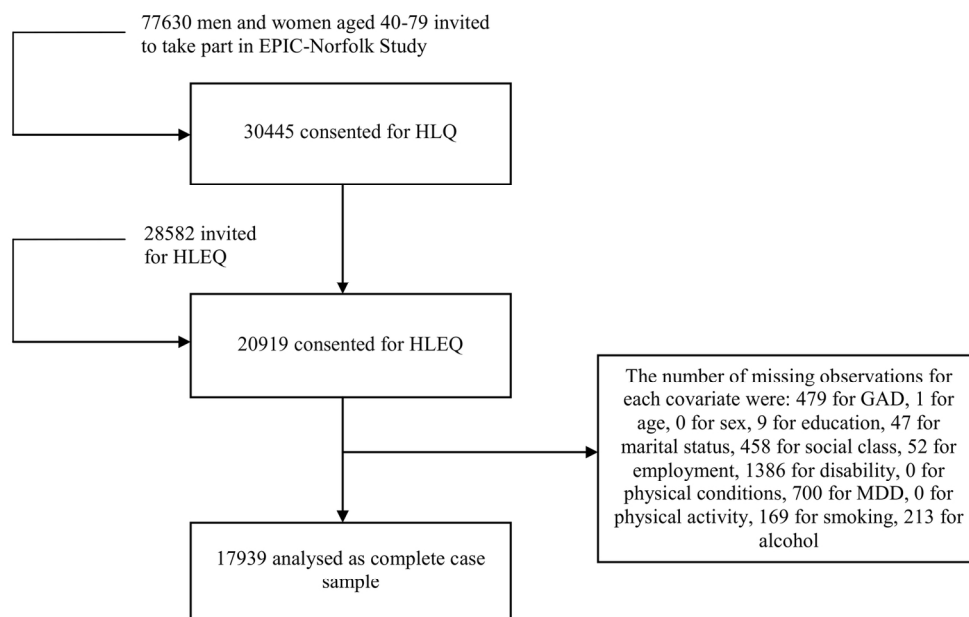

Note: Some participants had missing observations on more than one covariate.

Flowchart of the European Prospective Investigation of Cancer (EPIC)-Norfolk cohort. This is a flowchart showing the number of participants at each study stage: the number approached to participate in the EPIC-Norfolk study, the number enrolled at baseline, and with complete data on all covariates. The EPIC-Norfolk study consists of middle-aged and older British people.

153x135mm (300 x 300 DPI)

Appendix I: Table 1 Percentage and number of people with missing past-year GAD reported in 1996-2000 according to sociodemographic factors, health status, and behaviour risk factors for the EPIC-Norfolk cohort

| Characteristic                         | Total number with characteristic | Percentage and no. with missing past-year GAD |
|----------------------------------------|----------------------------------|-----------------------------------------------|
| <b>Socio-demographics</b>              |                                  |                                               |
| <b>Age (years)</b>                     |                                  |                                               |
| <50                                    | 2385                             | 1.1 (26)                                      |
| 50-60                                  | 6279                             | 1.1 (70)                                      |
| 60-70                                  | 5787                             | 0.9 (54)                                      |
| 70+                                    | 3685                             | 1.3 (47)                                      |
| <b>Sex</b>                             |                                  |                                               |
| Women                                  | 10055                            | 1.2 (118)                                     |
| Men                                    | 8081                             | 1.0 (79)                                      |
| <b>Education<sup>†</sup></b>           |                                  |                                               |
| Low                                    | 6178                             | 1.2 (72)                                      |
| High                                   | 11958                            | 1.1 (125)                                     |
| <b>Marital status</b>                  |                                  |                                               |
| Single                                 | 695                              | 1.3 (9)                                       |
| Married                                | 14687                            | 1.0 (149)                                     |
| Other*                                 | 2754                             | 1.4 (39)                                      |
| <b>Social class</b>                    |                                  |                                               |
| Manual                                 | 6918                             | 1.2 (82)                                      |
| Non-manual                             | 11218                            | 1.0 (115)                                     |
| <b>Employment</b>                      |                                  |                                               |
| Yes                                    | 7775                             | 0.8 (63) <sup>b</sup>                         |
| No                                     | 10361                            | 1.3 (134)                                     |
| <b>Health status</b>                   |                                  |                                               |
| <b>Physical conditions<sup>+</sup></b> |                                  |                                               |
| Yes                                    | 9285                             | 1.3 (119) <sup>b</sup>                        |
| No                                     | 8851                             | 0.9 (78)                                      |
| <b>Disability level</b>                |                                  |                                               |
| High <sup>¶</sup>                      | 9030                             | 1.4 (130) <sup>a</sup>                        |
| Low                                    | 9106                             | 0.7 (67)                                      |
| <b>Psychiatric conditions</b>          |                                  |                                               |
| <b>Past-year MDD</b>                   |                                  |                                               |
| Yes                                    | 983                              | 5.0 (49) <sup>a</sup>                         |
| No                                     | 17153                            | 0.9 (148)                                     |
| <b>Behaviour risk factors</b>          |                                  |                                               |
| <b>Physical activity</b>               |                                  |                                               |
| Active <sup>‡</sup>                    | 12963                            | 1.1 (141)                                     |
| Inactive                               | 5173                             | 1.1 (56)                                      |
| <b>Smoking status</b>                  |                                  |                                               |
| Current smoker                         | 1922                             | 1.5 (29)                                      |
| Former smoker                          | 7543                             | 1.0 (73)                                      |



|                       |      |                       |
|-----------------------|------|-----------------------|
| Never smoker          | 8671 | 1.1 (95)              |
| <b>Alcohol intake</b> |      |                       |
| High <sup>a</sup>     | 9327 | 0.9 (86) <sup>b</sup> |
| Low                   | 8809 | 1.3 (111)             |

‡ High education: O-level, A-level, degree; low education: refers to no education

\* Other: divorced, separated, widowed

+ Physical conditions: respiratory disease (asthma and bronchitis), allergies and hay fever, stroke, heart attack, cancer, diabetes, thyroid conditions, arthritis

¶ Below the median PCS value of 50.6

¥ Moderately inactive, moderately active, active

<sup>a</sup> 3+ units of alc./week (1 pint beer=2 units, 1 glass wine=1 unit, 1 glass sherry=1 unit, 1 glass spirits=1 unit)

<sup>a</sup>  $P < 0.001$

<sup>b</sup>  $P < 0.05$

For peer review only

## Appendix 2 – Multiple imputations for missing data

### 1. Main analysis: association between past-year GAD and non-psychiatric hospital admissions

First, we imputed missing data for all covariates except GAD, our main exposure. Based on the literature, we identified potential auxiliary variables, and we retained those that were correlated with the variables in our model and were good predictors of the missing status (based on statistical tests). Our imputation model included all variables from the analysis model and the auxiliary variables.

To retain as much information as possible, we conducted the imputations on non-transformed data—the original variables in our dataset. We imputed data using the fully conditional specification, and specified a linear regression model for continuous data that were normally distributed; predictive mean matching for continuous data that were not normally distributed; and logistic regression for categorical variables. Variable estimates were subsequently averaged from 100 imputed datasets using Rubin's rules (we transformed the data before running the analytic model of interest within each of the imputed datasets).<sup>1</sup>

We checked whether the imputations were acceptable by comparing 1) the means, standard deviations, and plots of recorded and imputed values for continuous variables, and 2) the frequencies and percentages of recorded and imputed values for each level of categorical variables.

Analyses were done using SAS 9.3 and p-values less than 0.05 were considered statistically significant.

Findings from this set of multiple imputations for missing data analysis provided the following effect estimate relating past-year GAD and non-psychiatric hospital admissions: IRR: 1.04, 95% CI: 1.02, 1.06. The IRR of 1.04 was the same as in the complete case analysis.

The same process was repeated and we imputed missing data for all covariates and also for GAD. This was the effect estimate: IRR: 1.05, 95% CI: 1.03, 1.08.

### 2. Subsidiary analysis: association between GAD-MDD comorbidity and non-psychiatric hospital admissions

When different forms of GAD were considered in relation to health service use, the effect estimate for GAD-MDD comorbidity was the only one that emerged as statistically significant in the complete case analysis. Therefore, we repeated this analysis using multiple imputations for missing data (similar process to that described in the first instance – we imputed missing data for all covariates except for GAD and MDD) and obtained the following result: IRR=1.20, 95% CI: 1.18, 1.22. The IRR is very similar to that obtained in the complete case analysis.

### Auxiliary variables used in the imputation models

| Variable                        | Questionnaire                            | Description of variable                            |
|---------------------------------|------------------------------------------|----------------------------------------------------|
| <b>Sociodemographic factors</b> |                                          |                                                    |
| History of psychiatric illness  | Health and Lifestyle Questionnaire (HLQ) | Self-reported history of other psychiatric illness |
| History of back pain            | Health and Lifestyle Questionnaire (HLQ) | Self-reported history of back pain                 |
| History of cholesterol          | Health and Lifestyle Questionnaire (HLQ) | Self-reported history of cholesterol               |
| History of migraine             | Health and Lifestyle Questionnaire (HLQ) | Self-reported history of migraine                  |
| History of tumour               | Health and Lifestyle Questionnaire (HLQ) | Self-reported history of tumour                    |

The questionnaire used for these variables have been previously described in the methods.

### References

1. Berglund P, Heeringa S. Multiple imputation of missing data using SAS. Cary, NC: SAS Institute Inc, 2014.

Please see the article line numbers (column on the right) and the explanations provided.

STROBE Statement—checklist of items that should be included in reports of observational studies

|                           | Item No | Recommendation                                                                                                                                                                                                                                                                                                                                                                                                                                                                                                                                                                                                                                                                                   | Line numbers within the article                               |
|---------------------------|---------|--------------------------------------------------------------------------------------------------------------------------------------------------------------------------------------------------------------------------------------------------------------------------------------------------------------------------------------------------------------------------------------------------------------------------------------------------------------------------------------------------------------------------------------------------------------------------------------------------------------------------------------------------------------------------------------------------|---------------------------------------------------------------|
| <b>Title and abstract</b> | 1       | (a) Indicate the study's design with a commonly used term in the title or the abstract<br>(b) Provide in the abstract an informative and balanced summary of what was done and what was found                                                                                                                                                                                                                                                                                                                                                                                                                                                                                                    | 9, 44<br>35-70                                                |
| <b>Introduction</b>       |         |                                                                                                                                                                                                                                                                                                                                                                                                                                                                                                                                                                                                                                                                                                  |                                                               |
| Background/rationale      | 2       | Explain the scientific background and rationale for the investigation being reported                                                                                                                                                                                                                                                                                                                                                                                                                                                                                                                                                                                                             | 95-142                                                        |
| Objectives                | 3       | State specific objectives, including any prespecified hypotheses                                                                                                                                                                                                                                                                                                                                                                                                                                                                                                                                                                                                                                 | 144-148                                                       |
| <b>Methods</b>            |         |                                                                                                                                                                                                                                                                                                                                                                                                                                                                                                                                                                                                                                                                                                  |                                                               |
| Study design              | 4       | Present key elements of study design early in the paper                                                                                                                                                                                                                                                                                                                                                                                                                                                                                                                                                                                                                                          | 156                                                           |
| Setting                   | 5       | Describe the setting, locations, and relevant dates, including periods of recruitment, exposure, follow-up, and data collection                                                                                                                                                                                                                                                                                                                                                                                                                                                                                                                                                                  | 155-166, 228-229                                              |
| Participants              | 6       | (a) <i>Cohort study</i> —Give the eligibility criteria, and the sources and methods of selection of participants. Describe methods of follow-up<br><i>Case-control study</i> —Give the eligibility criteria, and the sources and methods of case ascertainment and control selection. Give the rationale for the choice of cases and controls<br><i>Cross-sectional study</i> —Give the eligibility criteria, and the sources and methods of selection of participants<br>(b) <i>Cohort study</i> —For matched studies, give matching criteria and number of exposed and unexposed<br><i>Case-control study</i> —For matched studies, give matching criteria and the number of controls per case | 155-158, 160-162, 164-166, and especially 168-170             |
| Variables                 | 7       | Clearly define all outcomes, exposures, predictors, potential confounders, and effect modifiers. Give diagnostic criteria, if applicable                                                                                                                                                                                                                                                                                                                                                                                                                                                                                                                                                         | Outcome: 223-246<br>Exposure: 172-182<br>Confounders: 183-221 |
| Data sources/             | 8*      | For each variable of interest, give sources of data and details of methods of                                                                                                                                                                                                                                                                                                                                                                                                                                                                                                                                                                                                                    | There were two variables of interest in this study:           |



1  
2  
3  
4 addressed

5 *Cross-sectional study*—If applicable, describe analytical methods taking account of  
6 sampling strategy  
7

various means, unless they expressed that they wished  
to be removed from the mailing list. We elaborate on  
this in the manuscript.

---

8 (e) Describe any sensitivity analyses  
9  
10  
11  
12  
13  
14  
15  
16  
17  
18  
19  
20  
21  
22  
23  
24  
25  
26  
27  
28  
29  
30  
31  
32  
33  
34  
35  
36  
37  
38  
39  
40  
41  
42  
43  
44  
45

For peer review only

Results

|                  |     |                                                                                                                                                                                                              |                                                                                                                                                                                                                                                                                                                                                                                                                                                                                                                                                             |
|------------------|-----|--------------------------------------------------------------------------------------------------------------------------------------------------------------------------------------------------------------|-------------------------------------------------------------------------------------------------------------------------------------------------------------------------------------------------------------------------------------------------------------------------------------------------------------------------------------------------------------------------------------------------------------------------------------------------------------------------------------------------------------------------------------------------------------|
| Participants     | 13* | (a) Report numbers of individuals at each stage of study—eg numbers potentially eligible, examined for eligibility, confirmed eligible, included in the study, completing follow-up, and analysed            |                                                                                                                                                                                                                                                                                                                                                                                                                                                                                                                                                             |
|                  |     | (b) Give reasons for non-participation at each stage                                                                                                                                                         | We do not have the reasons for non-participation, because these data were not collected when the study was initiated in 1993.                                                                                                                                                                                                                                                                                                                                                                                                                               |
|                  |     | (c) Consider use of a flow diagram                                                                                                                                                                           | Flow diagram included in submission – figure 1.                                                                                                                                                                                                                                                                                                                                                                                                                                                                                                             |
| Descriptive data | 14* | (a) Give characteristics of study participants (eg demographic, clinical, social) and information on exposures and potential confounders                                                                     | 302-303, 321-325, 342-345, as well as, tables 1 and 2                                                                                                                                                                                                                                                                                                                                                                                                                                                                                                       |
|                  |     | (b) Indicate number of participants with missing data for each variable of interest                                                                                                                          | See flow diagram.                                                                                                                                                                                                                                                                                                                                                                                                                                                                                                                                           |
|                  |     | (c) Cohort study—Summarise follow-up time (eg, average and total amount)                                                                                                                                     | 299-300                                                                                                                                                                                                                                                                                                                                                                                                                                                                                                                                                     |
| Outcome data     | 15* | Cohort study—Report numbers of outcome events or summary measures over time                                                                                                                                  | Table 2 provides the mean number of hospital admissions for those with/without GAD over the 9-year follow-up.                                                                                                                                                                                                                                                                                                                                                                                                                                               |
|                  |     | Case-control study—Report numbers in each exposure category, or summary measures of exposure                                                                                                                 |                                                                                                                                                                                                                                                                                                                                                                                                                                                                                                                                                             |
|                  |     | Cross-sectional study—Report numbers of outcome events or summary measures                                                                                                                                   |                                                                                                                                                                                                                                                                                                                                                                                                                                                                                                                                                             |
| Main results     | 16  | (a) Give unadjusted estimates and, if applicable, confounder-adjusted estimates and their precision (eg, 95% confidence interval). Make clear which confounders were adjusted for and why they were included | Tables 3 and 4 contain unadjusted and progressively adjusted estimates. We also discussed the findings within the text, and provide odds ratios and 95% confidence intervals.<br><br>We included the confounders based on the literature – we mention this in the paper and cite relevant literature. As per strobe, we included this information in the methods section; and we omitted repeating this in the results section to reduce redundancy. However, if the editor would like us to repeat this information in the results, we are happy to do so. |

|                          |    |                                                                                                                                                                            |                                                                                                                                                                                                                                                                          |
|--------------------------|----|----------------------------------------------------------------------------------------------------------------------------------------------------------------------------|--------------------------------------------------------------------------------------------------------------------------------------------------------------------------------------------------------------------------------------------------------------------------|
|                          |    | (b) Report category boundaries when continuous variables were categorized                                                                                                  | The cut-offs for age, alcohol intake, and disability levels are provided (see also footnotes of tables).                                                                                                                                                                 |
|                          |    | (c) If relevant, consider translating estimates of relative risk into absolute risk for a meaningful time period                                                           |                                                                                                                                                                                                                                                                          |
| Other analyses           | 17 | Report other analyses done—eg analyses of subgroups and interactions, and sensitivity analyses                                                                             | The Results section contains the findings from the multiple imputations for missing data analysis – we also included further information on this in an appendix. Findings for GAD frequency, chronicity, age of onset, and comorbidity with MDD are reported in table 4. |
| <b>Discussion</b>        |    |                                                                                                                                                                            |                                                                                                                                                                                                                                                                          |
| Key results              | 18 | Summarise key results with reference to study objectives                                                                                                                   | 416-422                                                                                                                                                                                                                                                                  |
| Limitations              | 19 | Discuss limitations of the study, taking into account sources of potential bias or imprecision. Discuss both direction and magnitude of any potential bias                 | 438-476                                                                                                                                                                                                                                                                  |
| Interpretation           | 20 | Give a cautious overall interpretation of results considering objectives, limitations, multiplicity of analyses, results from similar studies, and other relevant evidence | 514-551 (We also have a section comparing our study results to those of others: 478-499, as well as a section on potential mechanisms explaining our findings: 501-512)                                                                                                  |
| Generalisability         | 21 | Discuss the generalisability (external validity) of the study results                                                                                                      | 471-473, 549-468                                                                                                                                                                                                                                                         |
| <b>Other information</b> |    |                                                                                                                                                                            |                                                                                                                                                                                                                                                                          |
| Funding                  | 22 | Give the source of funding and the role of the funders for the present study and, if applicable, for the original study on which the present article is based              | 567-568, 584-586                                                                                                                                                                                                                                                         |

\*Give information separately for cases and controls in case-control studies and, if applicable, for exposed and unexposed groups in cohort and cross-sectional studies.

**Note:** An Explanation and Elaboration article discusses each checklist item and gives methodological background and published examples of transparent reporting. The STROBE checklist is best used in conjunction with this article (freely available on the Web sites of PLoS Medicine at <http://www.plosmedicine.org/>, Annals of Internal Medicine at <http://www.annals.org/>, and Epidemiology at <http://www.epidem.com/>). Information on the STROBE Initiative is available at [www.strobe-statement.org](http://www.strobe-statement.org).



# BMJ Open

## Generalized anxiety disorder and non-psychiatric hospital admissions: findings from a large, population cohort study

|                                 |                                                                                                                                                                                                                                                                                                                                                                                                                                                                                             |
|---------------------------------|---------------------------------------------------------------------------------------------------------------------------------------------------------------------------------------------------------------------------------------------------------------------------------------------------------------------------------------------------------------------------------------------------------------------------------------------------------------------------------------------|
| Journal:                        | <i>BMJ Open</i>                                                                                                                                                                                                                                                                                                                                                                                                                                                                             |
| Manuscript ID                   | bmjopen-2017-018539.R2                                                                                                                                                                                                                                                                                                                                                                                                                                                                      |
| Article Type:                   | Research                                                                                                                                                                                                                                                                                                                                                                                                                                                                                    |
| Date Submitted by the Author:   | 18-Oct-2017                                                                                                                                                                                                                                                                                                                                                                                                                                                                                 |
| Complete List of Authors:       | Remes, Olivia; University of Cambridge, Public Health and Primary Care<br>Wainwright, Nicholas; University of Cambridge, UK, Public Health and Primary Care<br>Surtees, Paul; University of Cambridge, Department of Public Health and Primary Care<br>LaFortune, Louise; University of Cambridge, Institute of Public Health<br>Khaw, Kay-Tee; University of Cambridge, Department of Public Health and Primary Care<br>Brayne, Carol; University of Cambridge, Institute of Public Health |
| <b>Primary Subject Heading</b>: | Mental health                                                                                                                                                                                                                                                                                                                                                                                                                                                                               |
| Secondary Subject Heading:      | Health services research, Public health                                                                                                                                                                                                                                                                                                                                                                                                                                                     |
| Keywords:                       | EPIDEMIOLOGY, MENTAL HEALTH, PUBLIC HEALTH                                                                                                                                                                                                                                                                                                                                                                                                                                                  |
|                                 |                                                                                                                                                                                                                                                                                                                                                                                                                                                                                             |

SCHOLARONE™  
Manuscripts

1  
2  
3  
4  
5  
6  
7  
8  
9  
10  
11  
12  
13  
14  
15  
16  
17  
18  
19  
20  
21  
22  
23  
24  
25  
26  
27  
28  
29  
30  
31  
32  
33  
34  
35  
36  
37  
38  
39  
40  
41  
42  
43  
44  
45  
46  
47  
48  
49  
50  
51  
52  
53  
54  
55  
56  
57  
58  
59  
60

1  
2  
3  
4  
5  
6  
7  
8  
9  
10  
11  
12  
13  
14  
15  
16  
17  
18  
19  
20  
21  
22  
23  
24  
25  
26  
27  
28  
29  
30  
31  
32  
33  
34  
35  
36  
37  
38  
39  
40  
41  
42  
43  
44  
45  
46  
47  
48  
49  
50  
51  
52  
53  
54  
55  
56  
57  
58  
59  
60

**Generalized anxiety disorder and non-psychiatric hospital admissions: findings from a large, population cohort study**

Olivia Remes<sup>1</sup>, Nicholas WJ Wainwright<sup>2</sup>, Paul Surtees<sup>1</sup>, Louise Lafortune<sup>1</sup>, Kay-Tee Khaw<sup>3</sup>, Carol Brayne<sup>1</sup>

<sup>1</sup>Department of Public Health and Primary Care, University of Cambridge, Forvie Site, Robinson Way, Cambridge, UK CB2 0SR

<sup>2</sup>(Retired) Department of Public Health and Primary Care, University of Cambridge, 2 Worts' Causeway, Cambridge, UK CB1 8RN

<sup>3</sup>Department of Public Health and Primary Care, University of Cambridge, 2 Worts' Causeway, Cambridge, UK CB1 8RN

Figures: 1; Tables: 4

Correspondence to: Olivia Remes [or260@medschl.cam.ac.uk](mailto:or260@medschl.cam.ac.uk), telephone: 07776740550

1  
2  
3 31 **ABSTRACT**  
4 32

5 33  
6 34 **OBJECTIVE**

7  
8 35 Generalized anxiety disorder (GAD) is the most common anxiety disorder in the general  
9 36 population, and has been associated with high economic and human burden. However, it  
10 37 has been neglected in the health services literature. The objective of this study will be to  
11 38 assess whether GAD leads to non-psychiatric hospital admissions using data from the  
12 39 European Prospective Investigation of Cancer-Norfolk. Other aims include determining  
13 40 whether early or late onset forms of the disorder, episode chronicity and frequency, and  
14 41 comorbidity with major depressive disorder (MDD) contribute to non-psychiatric hospital  
15 42 admissions.  
16 43

17 44 **DESIGN**

18  
19 45 Large, population study.  
20 46

21 47 **SETTING**

22 48 UK population-based cohort.  
23 49

24 50 **PARTICIPANTS**

25  
26 51 30,445 people over the age of 40 were recruited through general practice registers in  
27 52 England. Of these, 20,919 completed a structured health and lifestyle questionnaire used to  
28 53 assess GAD. Anxiety was examined in 1996-2000, and health service use was captured  
29 54 between 1999/00 and 2009 through record linkage with large, administrative health  
30 55 databases. 17,939 participants had complete data on covariates.  
31 56

32 57 **MAIN OUTCOME MEASURE**

33  
34 58 Past-year GAD defined according to the Diagnostic and Statistical Manual of Mental  
35 59 Disorders, fourth edition.  
36 60

37 61 **RESULTS**

38  
39 62 In this study, 2.2% (393/17,939) respondents had GAD. Anxiety was not independently  
40 63 associated with non-psychiatric hospital admissions (IRR=1.04, 95% CI: 0.90, 1.20) over nine  
41 64 years. However, those whose anxiety was comorbid with depression showed a statistically  
42 65 significantly increased risk for non-psychiatric hospital admissions (IRR=1.23, 95% CI: 1.02,  
43 66 1.49).  
44 67

45 68 **CONCLUSION**

46  
47 69 People with GAD and MDD comorbidity were at an increased risk for hospital admissions.  
48 70 Clinicians should consider that meeting criteria for a pure or individual disorder at one point  
49 71 in time, such as past-year GAD does not necessarily predict deleterious health outcomes;  
50 72 rather different forms of the disorder, such as comorbid cases might be of greater  
51 73 importance.  
52 74

53 75 Key words: Anxiety, anxiety disorders, health services  
54  
55  
56  
57  
58  
59  
60

1  
2  
3 76 **ARTICLE SUMMARY**  
4

5 77 **Strengths and limitations of this study**  
6

- 7  
8 78 • We used a large, population-based sample of middle- and older-aged adults and  
9 79 adjusted for a range of important confounders, such as, sociodemographic factors  
10 80 and medical history.  
11 81  
12 82 • We used a structured, self-reported questionnaire to assess presence of past-year  
13 83 GAD, and participants were followed for 9 years.  
14 84  
15 85 • We examined health services through record linkage with large, administrative  
16 86 health databases.  
17 87  
18 88 • Those who participated in this study were somewhat less deprived and healthier  
19 89 than individuals living in other parts of England; therefore, our results may not  
20 90 generalize to people living in extremely deprived circumstances.  
21 91  
22 92  
23  
24  
25  
26  
27  
28  
29  
30  
31  
32  
33  
34  
35  
36  
37  
38  
39  
40  
41  
42  
43  
44  
45  
46  
47  
48  
49  
50  
51  
52  
53  
54  
55  
56  
57  
58  
59  
60

## INTRODUCTION

93  
94  
95 Anxiety disorders[1] are the most common class of psychiatric disorders in the general  
96 population. The Global Burden of Disease study[2] estimated that anxiety disorders  
97 contribute to 26.8 million disability adjusted life years, and their annual direct cost is \$42.3  
98 billion[3]. Generalized anxiety disorder (GAD) is characterized by excessive, pervasive  
99 worry, and a number of additional symptoms, such as restlessness and muscle tension. It is  
100 a prevalent and disabling condition in adults, and can lead to serious impairment in social  
101 and occupational functioning.[4] GAD is associated with poor quality of life, impaired  
102 functioning and risk of suicide.[5-8] Across the anxiety disorders, this condition has been  
103 found to be the most debilitating.[5, 9] Although there is effective treatment for GAD, only  
104 a third of those affected receive any treatment.[8] This is because anxiety disorders are  
105 frequently under-recognized and mismanaged by clinicians in primary care, which is often  
106 the first point of contact for those with mental health problems.[10]

107

108 Although detection of anxiety in clinical settings is poor[11, 12] and the presence of  
109 undiagnosed mental health problems can contribute to further emotional distress in  
110 patients down the line[12], it could be that disorders such as GAD represent more than just  
111 psychological or worry-related symptoms. It may be that anxiety symptoms are masking  
112 underlying poor physical health or could be an early warning signal for future health  
113 problems that are not yet detectable by standard medical tests. Such problems cannot be  
114 simply resolved through psychological therapies or psychotropic medication.

115

116 Anxiety has been linked to hypothalamic-pituitary-adrenal (HPA)-axis dysregulation and  
117 inflammation, and this can lead to poor health.[9] A recent study of hospitalized  
118 patients[13] also showed that people with anxiety disorders had more co-morbid physical  
119 conditions, including cardiovascular diseases and their risk factors, compared to people  
120 without anxiety disorders. Conversely, anxiety could also represent a response to  
121 underlying medical illness, and physical illness can exacerbate anxiety; the possibility of a  
122 bidirectional relationship between anxiety and physical health should not be excluded.[14,  
123 15] Compelling evidence from prospective studies, however, has shown that anxiety can

1  
2  
3 124 indeed increase the risk of serious chronic conditions, such as cancer[16] and coronary heart  
4  
5 125 disease (CHD)[17].

6  
7 126 When investigating the links between mental disorders and health outcomes, early or late-  
8  
9 127 onset forms of anxiety disorders, as well as psychiatric comorbidity should be also  
10  
11 128 considered. A study[18] of over one million Swedish men followed for over 20 years  
12  
13 129 showed that early-onset forms of mental disorders in particular led to increased risk of  
14  
15 130 incident CHD. Anxiety disorders, such as, GAD are also frequently comorbid with major  
16  
17 131 depressive disorder (MDD)[19], and psychiatric comorbidity has been associated with  
18  
19 132 poorer quality of life, worse prognosis, and higher use of health services for mental health  
20  
21 133 problems than pure forms of the disorder.[20, 21, 22] Therefore, identifying clinical aspects,  
22  
23 134 such as, early or late onset forms of the condition, episode chronicity and frequency, and  
24  
25 135 comorbidity with MDD can lead to better clinical management and more accurate  
26  
27 136 prediction of future disability and health service use.[23]

28  
29 137  
30  
31 138 GAD is one of the most common anxiety disorders in the general population[24] and the  
32  
33 139 primary care setting[25], and has been associated with high economic and human burden.  
34  
35 140 However, it has been neglected in the health services literature, with the exception of some  
36  
37 141 studies showing GAD to contribute to higher use of primary care services in primary care  
38  
39 142 samples.[26-29] Clinical samples, however, have the potential for self-selection bias.  
40  
41 143 Whether GAD leads to non-psychiatric hospital admissions is unknown.

42  
43 144  
44  
45 145 The objective of this study will be to assess the association between GAD and non-  
46  
47 146 psychiatric hospital admissions in a longitudinal, population cohort of over 18,000 British  
48  
49 147 individuals followed for 9 years. The aim is also to determine whether early or late onset  
50  
51 148 forms of the disorder, episode frequency and chronicity, and comorbidity with MDD  
52  
53 149 contribute to non-psychiatric hospital admissions.

54  
55  
56  
57  
58  
59  
60  
150  
151

## METHODS

### Study population

The study population was drawn from the European Prospective Investigation of Cancer-Norfolk longitudinal, cohort study, described in detail elsewhere.[30, 31] Briefly, a total of 30,445 participants over the age of 40 living in Norwich and the surrounding towns and rural areas were recruited between 1993 and 1997 using general practice registers. At baseline, they completed a health questionnaire capturing sociodemographics and medical history. During follow-up, between 1993 and 1999/2000, participants completed self-reported postal questionnaires provided they: 1) were still alive, 2) did not ask to be removed from the study's mailing list, and 3) had a valid mailing address. Between 1996 and 1999/2000, respondents completed a Health and Life Experiences Questionnaire (HLEQ)[30] used to capture information on psychiatric disorders, other psychosocial factors, and risk behaviours. Record linkage with administrative health databases using a unique identifier was used to determine hospitalization admissions data until 2009.

All participants recruited through general-practice registers and who completed a baseline health questionnaire were eligible to be included in our study; those who completed a psychosocial questionnaire during follow-up were eligible to be included in our analysis.

### Assessment of GAD

The HLEQ was used to derive a measure of GAD according to the Diagnostic and Statistical Manual of Mental Disorders, fourth edition. The HLEQ captured the onset and offset timings of episodes of past-year GAD.[32] Past-year GAD consisted of at least one episode that had offset within 12 months of administration of the HLEQ. DSM-IV GAD was diagnosed if participants reported having uncontrollable, excessive worry for six months or longer on most days than not that resulted in disability or impairment. In addition, at least three of the following symptoms needed to have been present: restlessness, irritability, muscle tension, fatigue, trouble concentrating because of worry, mind going blank, trouble falling asleep, trouble staying asleep, and feeling keyed up or on edge.

1  
2  
3 184 **Assessment of covariates**  
4  
5 185

6 186 Potential confounders (based on the literature) included sociodemographics (age, sex,  
7 187 education, marital status, social class, employment), prevalent physical diseases, disability,  
8 188 MDD, and risk behaviours (alcohol use, smoking, physical activity). The final categorization  
9 189 of the variables took cell size into account and was also done in accordance with previous  
10 190 literature.[32, 33-38] Age was first assessed as a categorical variable, and subsequently  
11 191 divided into 10-year bands. Sex was categorized into male vs. female; marital status was  
12 192 categorized into: married, single (or never married), and others (widowed, divorced,  
13 193 separated); educational attainment into high (vocational or formal qualifications at the A- or  
14 194 O-level or degree-level qualifications) vs. low (no formal qualifications). Social class was  
15 195 derived using the Computer-Assisted Standard Occupational Coding[38] and categorized as  
16 196 follows: I (professionals), II (managerial and technical occupations), III non-manual and III  
17 197 manual (skilled workers), IV (partly skilled workers), and V (unskilled manual workers). For  
18 198 men, social class was coded using their own occupation except when they were unemployed  
19 199 or retired in which case their partner's social class was used. Unemployed men without  
20 200 partners were unclassified. Social class in women was based on their partner's except when  
21 201 the partner's social class was unclassified, missing, or they had no partner in which case  
22 202 social class was based on their own occupation. An unemployed woman without a partner  
23 203 was coded as unclassified. The final categorization of social class included manual: skilled  
24 204 manual, partly skilled, and unskilled; and non-manual: professionals, managerial and  
25 205 technical, and skilled non-manual. Employment was divided into yes vs. no.  
26  
27  
28  
29  
30  
31  
32  
33  
34  
35  
36  
37  
38  
39  
40  
41  
42

43 207 Behaviour risk factor measures included alcohol intake (units of alcohol/week), smoking  
44 208 status (current, former, non-smoker), and physical activity (inactive, moderately inactive,  
45 209 moderately active, active). Presence of past-year DSM-IV major depressive disorder (MDD)  
46 210 (yes/no) was also assessed.[39]  
47  
48  
49  
50

51 211  
52 212 Individual-level health status was assessed through the construction of a variable capturing  
53 213 major prevalent physical diseases associated with anxiety.[40] This was based on HLQ  
54 214 questions asking participants: "Has the doctor ever told you that you have any of the  
55 215 following?", followed by a list of options, such as stroke, myocardial infarction, and cancer.  
56  
57  
58  
59  
60



1  
2  
3 216 To determine disability levels, we used the physical component summary score (PCS) of the  
4 217 Medical Outcomes Study 36-Item Short Form (SF-36), a widely-used, validated self-  
5 218 assessment tool. A score of 100 represents no disability and 0 represents a high level of  
6 219 disability.[41] PCS scores were dichotomized above and below the median.  
7  
8  
9

10 220

11 221 All of these individual-level variables were regarded as potential confounders and selected  
12 222 based on the literature and their association with anxiety and health service use.[42, 43]  
13  
14

15 223

### 16 224 **Hospital service use**

17 225

18 226 All analyses are based on non-psychiatric hospitalizations. Primary care service use was not  
19 227 captured in this study.  
20  
21

22 228

23 229 Frequency of hospitalization between 1999/00 and 2009 was determined using  
24 230 administrative health databases maintained by the National Health Service. The East  
25 231 Norfolk Primary Health Care trust databases were used, and these are updated on an  
26 232 ongoing basis and provide information on clinical and administrative data from participating  
27 233 facilities, such as, hospitals.  
28  
29

30 234

31 235 England is under a publicly-funded health care system (the National Health Service), free at  
32 236 the point of delivery; therefore, we expect factors, such as access to health insurance or  
33 237 personal income, to have minimal impact on the care that is obtained by study participants.  
34  
35

36 238 The databases used in this study are maintained by the National Health Service, which is  
37 239 likely to capture most hospital admissions from the population, as private sector provision is  
38 240 minimal. This means that admissions data in our study can be considered complete for the  
39 241 ascertainment of hospital/health service use, and the likelihood of bias minimal. To access  
40 242 hospital services in the UK, a referral is needed from the primary care practitioner, who acts  
41 243 as a gate-keeper to secondary care.  
42  
43

44 244

45 245 The East Norfolk Primary Health Care databases were linked to the EPIC-Norfolk cohort  
46 246 using participants' unique National Health Service number, which allows complete record  
47 247 linkage across settings and calendar time.  
48  
49  
50  
51  
52  
53  
54  
55  
56  
57  
58  
59  
60

1  
2  
3 248 Vital status for participants was determined through record linkage with the United  
4  
5 249 Kingdom Office of National Statistics. Vital status was available for all participants. This  
6  
7 250 allowed us to exclude those who died before their health service use was ascertained.  
8  
9 251

## 10 252 **Statistical Analysis**

11 253  
12  
13 254 First, demographics, social class, medical and psychiatric conditions, and risk behaviours  
14  
15 255 were compared by GAD status - the chi-square test was used to determine whether  
16  
17 256 differences were statistically significant for categorical variables. Second, the mean number  
18  
19 257 of hospital admissions was determined for each characteristic/covariate - the Kruskal Wallis  
20  
21 258 test was used to determine statistical significance for categorical covariates with three or  
22  
23 259 more categories, while the Wilcoxon rank-sum test was used for dichotomous covariates.  
24  
25 260

26 261 Since the number of hospital admissions was skewed and the variance was much larger than  
27  
28 262 the mean, zero-inflated negative binomial regression was used for frequency of hospital  
29  
30 263 utilization (number of hospital admissions). The log-likelihood test showed that this model  
31  
32 264 was superior to Poisson regression. Three models were fitted for hospital admissions with  
33  
34 265 progressive adjustment of covariates: model A adjusted for sociodemographics (age, sex,  
35  
36 266 education, marital status, social class, employment), physical conditions and disability;  
37  
38 267 model B further accounted for past-year MDD (assessed at the same questionnaire point as  
39  
40 268 past-year GAD); and model C further controlled for physical activity, alcohol, and smoking.  
41  
42 269 Multiple imputations for missing data were also carried out on the fully-adjusted model  
43  
44 270 assessing the association between past-year GAD and non-psychiatric hospitalization (our  
45  
46 271 primary objective).  
47  
48 272

49 273 Finally, we determined whether the risk for hospitalization was higher among those with: 1)  
50  
51 274 3 or more episodes of lifetime GAD (versus those with fewer than 3 episodes or no GAD), 2)  
52  
53 275 episodes that lasted on average 6 months or more (versus those with fewer than 6 months  
54  
55 276 or no GAD), 3) age of onset at 30 years or younger (versus people with age at onset over 30  
56  
57 277 years or no GAD), and 4) psychiatric comorbidity with MDD (versus no GAD-MDD  
58  
59 278 comorbidity). Two-sided statistical tests for the maximum likelihood zero inflation  
60

1  
2  
3 279 parameter estimates were conducted and a p-value of <0.05 was used for statistical  
4 280 significance. Analyses were implemented in SAS, version 9.3.

5  
6 281

7  
8 282 To arrive at the study size, we went through the following steps: of the 30,445 who  
9 283 completed the baseline HLQ, we retained those participants who completed the HLEQ  
10 284 (20,919), and of these, we kept those people with complete data on all covariates (17,939).  
11 285 (Figure 1)

12  
13  
14 286

### 15 16 17 18 287 **Patient involvement**

19 288

20  
21 289 There were no patients involved in the development of the research question and outcome  
22 290 measures, the design of the study, or the recruitment to and conduct of the study.

23  
24  
25 291  
26  
27  
28  
29  
30  
31  
32  
33  
34  
35  
36  
37  
38  
39  
40  
41  
42  
43  
44  
45  
46  
47  
48  
49  
50  
51  
52  
53  
54  
55  
56  
57  
58  
59  
60

**RESULTS**

292  
293  
294 Of the 30,445 people recruited at baseline, 20,919 participants completed the HLEQ; most  
295 of the missing observations were from past-year GAD (479), past-year MDD (700), and  
296 disability (1386); the rest of the missing observations were generated from the other  
297 covariates (Figure 1). Notable findings from the missing data analysis show that people with  
298 missing GAD more often had pre-existing health conditions, high disability, MDD, low  
299 alcohol consumption, and were without employment (Appendix I).

300  
301 The final sample included a total of 17,939 participants. Participants were assessed  
302 between 1999/00 and 2009 (followed for 9 years) (Figure 1).

303  
304 In 1996-2000, GAD was present in 393 out of 17,939 (2.2%) people. Table 1 shows the  
305 baseline characteristics of participants by GAD status.

306

307 **Table 1 Percentage and number of people with past-year GAD reported in 1996-2000**  
 308 **according to sociodemographic factors, health status, and behaviour risk factors for the**  
 309 **EPIC-Norfolk cohort (n=17,939)**  
 310

| Characteristic                         | Number with characteristic | Percentage and number with past-year GAD |
|----------------------------------------|----------------------------|------------------------------------------|
| <b>Socio-demographics</b>              |                            |                                          |
| <b>Age (years)</b>                     |                            |                                          |
| <50                                    | 2359                       | 3.4 (79) <sup>a</sup>                    |
| 50-60                                  | 6209                       | 2.9 (179)                                |
| 60-70                                  | 5733                       | 1.6 (94)                                 |
| 70+                                    | 3638                       | 1.1 (41)                                 |
| <b>Sex</b>                             |                            |                                          |
| Women                                  | 9937                       | 2.5 (249) <sup>b</sup>                   |
| Men                                    | 8002                       | 1.8 (144)                                |
| <b>Education<sup>‡</sup></b>           |                            |                                          |
| Low                                    | 6106                       | 2.0 (120) <sup>b</sup>                   |
| High                                   | 11833                      | 2.3 (273)                                |
| <b>Marital status</b>                  |                            |                                          |
| Single                                 | 686                        | 3.6 (25) <sup>a</sup>                    |
| Married                                | 14538                      | 2.0 (284)                                |
| Other <sup>*</sup>                     | 2715                       | 3.1 (84)                                 |
| <b>Social class</b>                    |                            |                                          |
| Manual                                 | 6836                       | 2.0 (137)                                |
| Non-manual                             | 11103                      | 2.3 (256)                                |
| <b>Employment</b>                      |                            |                                          |
| Yes                                    | 7712                       | 2.0 (155)                                |
| No                                     | 10227                      | 2.3 (238)                                |
| <b>Health status</b>                   |                            |                                          |
| <b>Physical conditions<sup>†</sup></b> |                            |                                          |
| Yes                                    | 9166                       | 2.7 (251) <sup>a</sup>                   |
| No                                     | 8773                       | 1.6 (142)                                |
| <b>Disability level</b>                |                            |                                          |
| High <sup>¶</sup>                      | 8900                       | 3.0 (266) <sup>a</sup>                   |
| Low                                    | 9039                       | 1.4 (127)                                |
| <b>Psychiatric conditions</b>          |                            |                                          |
| <b>Past-year MDD</b>                   |                            |                                          |
| Yes                                    | 934                        | 21.4 (200) <sup>a</sup>                  |
| No                                     | 17005                      | 1.1 (193)                                |
| <b>Behaviour risk factors</b>          |                            |                                          |
| <b>Physical activity</b>               |                            |                                          |
| Active <sup>x</sup>                    | 12822                      | 2.1 (272)                                |
| Inactive                               | 5117                       | 2.4 (121)                                |
| <b>Smoking status</b>                  |                            |                                          |
| Current smoker                         | 1893                       | 4.7 (89) <sup>a</sup>                    |
| Former smoker                          | 7470                       | 1.9 (141)                                |
| Never smoker                           | 8576                       | 1.9 (163)                                |
| <b>Alcohol intake</b>                  |                            |                                          |
| High <sup>α</sup>                      | 9241                       | 2.0 (182) <sup>b</sup>                   |

1  
2  
3  
4  
5  
6  
7  
8  
9  
10  
11  
12  
13  
14  
15  
16  
17  
18  
19  
20  
21  
22  
23  
24  
25  
26  
27  
28  
29  
30  
31  
32  
33  
34  
35  
36  
37  
38  
39  
40  
41  
42  
43  
44  
45  
46  
47  
48  
49  
50  
51  
52  
53  
54  
55  
56  
57  
58  
59  
60

|     |      |           |     |
|-----|------|-----------|-----|
| Low | 8698 | 2.4 (211) | 311 |
|-----|------|-----------|-----|

312

313 ‡ High education: O-level, A-level, degree; low education: refers to no education

314 \* Other: divorced, separated, widowed

315 † Physical conditions: respiratory disease (asthma and bronchitis), allergies and hay fever, stroke, heart

316 attack, cancer, diabetes, thyroid conditions, arthritis

317 ¶ Below the median PCS value of 50.6

318 ‡ Moderately inactive, moderately active, active

319 <sup>a</sup> 3+ units of alc./week (1 pint beer=2 units, 1 glass wine=1 unit, 1 glass sherry=1 unit, 1 glass spirits=1 unit)

320

321 <sup>a</sup>  $P < 0.001$ 322 <sup>b</sup>  $P < 0.05$ 

For peer review only

1  
2  
3 323 Those with GAD were more likely to be younger, women, inactive, current smokers, low  
4 324 alcohol consumers, of higher educational attainment, single, of non-manual social class,  
5 325 without employment, with physical conditions, high levels of disability, and MDD. Table 2  
6 326 summarizes the means and standard deviations of the number of hospital admissions by  
7 327 participant characteristics.  
8  
9 328  
10  
11  
12  
13  
14  
15  
16  
17  
18  
19  
20  
21  
22  
23  
24  
25  
26  
27  
28  
29  
30  
31  
32  
33  
34  
35  
36  
37  
38  
39  
40  
41  
42  
43  
44  
45  
46  
47  
48  
49  
50  
51  
52  
53  
54  
55  
56  
57  
58  
59  
60

329 **Table 2: Non-psychiatric hospital admissions (mean, SD) by participant characteristics in**  
 330 **17,939 British people between 1999/00 and 2009**

331

|                                        | Total number with characteristic | Number of admissions    |
|----------------------------------------|----------------------------------|-------------------------|
| Characteristic                         |                                  | Mean (SD)               |
| <b>Past-year GAD</b>                   |                                  |                         |
| Yes                                    | 393                              | 4.0 (6.3) <sup>a</sup>  |
| No                                     | 17546                            | 3.4 (13.0)              |
| <b>Socio-demographics</b>              |                                  |                         |
| <b>Age (years)</b>                     |                                  |                         |
| <50                                    | 2359                             | 1.9 (9.8) <sup>a</sup>  |
| 50-60                                  | 6209                             | 3.0 (16.5)              |
| 60-70                                  | 5733                             | 3.8 (11.2)              |
| 70+                                    | 3638                             | 4.6 (9.6)               |
| <b>Sex</b>                             |                                  |                         |
| Women                                  | 9937                             | 3.1 (14.0) <sup>a</sup> |
| Men                                    | 8002                             | 3.9 (11.3)              |
| <b>Education<sup>‡</sup></b>           |                                  |                         |
| Low                                    | 6106                             | 4.1 (17.1) <sup>a</sup> |
| High                                   | 11833                            | 3.1 (10.1)              |
| <b>Marital status</b>                  |                                  |                         |
| Single                                 | 686                              | 3.0 (8.9) <sup>a</sup>  |
| Married                                | 14538                            | 3.3 (10.9)              |
| Other*                                 | 2715                             | 4.0 (21.0)              |
| <b>Social class</b>                    |                                  |                         |
| Manual                                 | 6836                             | 4.0 (18.3) <sup>a</sup> |
| Non-manual                             | 11103                            | 3.1 (7.8)               |
| <b>Employment</b>                      |                                  |                         |
| Yes                                    | 7712                             | 2.5 (9.1) <sup>a</sup>  |
| No                                     | 10227                            | 4.1 (15.1)              |
| <b>Health status</b>                   |                                  |                         |
| <b>Physical conditions<sup>‡</sup></b> |                                  |                         |
| Yes                                    | 9166                             | 3.9 (10.4) <sup>a</sup> |
| No                                     | 8773                             | 3.0 (15.1)              |
| <b>Disability level</b>                |                                  |                         |
| High <sup>¶</sup>                      | 8900                             | 4.4 (16.5) <sup>a</sup> |
| Low                                    | 9039                             | 2.5 (7.8)               |
| <b>Psychiatric conditions</b>          |                                  |                         |
| <b>Past-year MDD</b>                   |                                  |                         |
| Yes                                    | 934                              | 4.5 (13.6) <sup>a</sup> |
| No                                     | 17005                            | 3.4 (12.9)              |
| <b>Behaviour risk factors</b>          |                                  |                         |
| <b>Physical activity</b>               |                                  |                         |
| Active <sup>‡</sup>                    | 12822                            | 3.2 (13.3) <sup>a</sup> |
| Inactive                               | 5117                             | 4.1 (11.7)              |
| <b>Smoking status</b>                  |                                  |                         |
| Current smoker                         | 1893                             | 4.6 (26.8) <sup>a</sup> |



|                       |      |                         |
|-----------------------|------|-------------------------|
| Former smoker         | 7470 | 3.8 (11.4)              |
| Never smoker          | 8576 | 2.9 (8.6)               |
| <b>Alcohol intake</b> |      |                         |
| High <sup>a</sup>     | 9241 | 3.2 (13.3) <sup>a</sup> |
| Low                   | 8698 | 3.7 (12.5)              |

332

333 † High education: O-level, A-level, degree; low education: refers to no education

334 \* Other: divorced, separated, widowed

335 † Physical conditions: respiratory disease (asthma and bronchitis), allergies and hay fever, stroke, heart attack, cancer, diabetes, thyroid conditions, arthritis

337 ¶ Below the median PCS value of 50.6

338 ¥ Moderately inactive, moderately active, active

339 <sup>a</sup> 3+ units of alc./week (1 pint beer=2 units, 1 glass wine=1 unit, 1 glass sherry=1 unit, 1 glass spirits=1 unit)

340

341 <sup>a</sup>  $P < 0.001$ 342 <sup>b</sup>  $P < 0.05$ 

343

1  
2  
3 344 Participants with GAD had a higher frequency of hospitalization compared to those without  
4  
5 345 GAD. Some of the findings show that frequency of hospitalization was markedly higher  
6  
7 346 among older age groups, men, those with low educational attainment, unemployed  
8  
9 347 participants, those with high levels of disability, and with past-year MDD.

10 348

11 349 Table 3 shows the unadjusted and adjusted incidence rate ratios of hospital admissions by

12 350 GAD status.

13  
14 351  
15  
16  
17  
18  
19  
20  
21  
22  
23  
24  
25  
26  
27  
28  
29  
30  
31  
32  
33  
34  
35  
36  
37  
38  
39  
40  
41  
42  
43  
44  
45  
46  
47  
48  
49  
50  
51  
52  
53  
54  
55  
56  
57  
58  
59  
60

For peer review only

352 **Table 3: Associations between past-year GAD reported in 1996-2000 and non-psychiatric**  
 353 **hospital admissions in 1999/00-2009 in 17,939 British people over the age of 40**  
 354

| IRR and 95% CI                         |                   |                   |                   |                   |
|----------------------------------------|-------------------|-------------------|-------------------|-------------------|
| Characteristic                         | Crude IRR         | A <sup>1</sup>    | B <sup>2</sup>    | C <sup>3</sup>    |
| <b>Past-year GAD</b>                   |                   |                   |                   |                   |
| Yes                                    | 1.18 (1.02, 1.36) | 1.25 (1.09, 1.43) | 1.10 (0.96, 1.27) | 1.04 (0.90, 1.20) |
| No                                     | 1.00              | 1.00              | 1.00              | 1.00              |
| <b>Socio-demographics</b>              |                   |                   |                   |                   |
| <b>Age</b>                             |                   |                   |                   |                   |
| Per 10 years                           | 1.36 (1.33, 1.40) | 1.19 (1.16, 1.23) | 1.20 (1.17, 1.24) | 1.21 (1.18, 1.25) |
| <b>Sex</b>                             |                   |                   |                   |                   |
| Women                                  | 0.80 (0.76, 0.83) | 0.76 (0.73, 0.79) | 0.76 (0.72, 0.79) | 0.78 (0.74, 0.81) |
| Men                                    | 1.00              | 1.00              | 1.00              | 1.00              |
| <b>Education<sup>‡</sup></b>           |                   |                   |                   |                   |
| Low                                    | 1.30 (1.24, 1.36) | 1.13 (1.08, 1.18) | 1.13 (1.08, 1.19) | 1.11 (1.06, 1.16) |
| High                                   | 1.00              | 1.00              | 1.00              | 1.00              |
| <b>Marital status</b>                  |                   |                   |                   |                   |
| Single                                 | 0.88 (0.79, 0.99) | 0.85 (0.77, 0.95) | 0.85 (0.76, 0.95) | 0.84 (0.76, 0.94) |
| Married                                | 1.00              | 1.00              | 1.00              | 1.00              |
| Other*                                 | 1.21 (1.14, 1.28) | 1.17 (1.11, 1.24) | 1.14 (1.07, 1.21) | 1.09 (1.03, 1.16) |
| <b>Social class</b>                    |                   |                   |                   |                   |
| Manual                                 | 1.29 (1.23, 1.34) | 1.24 (1.19, 1.30) | 1.24 (1.19, 1.30) | 1.21 (1.16, 1.26) |
| Non-manual                             | 1.00              | 1.00              | 1.00              | 1.00              |
| <b>Employment</b>                      |                   |                   |                   |                   |
| Yes                                    | 1.00              | 1.00              | 1.00              | 1.00              |
| No                                     | 1.64 (1.57, 1.71) | 1.18 (1.12, 1.25) | 1.18 (1.12, 1.24) | 1.15 (1.09, 1.21) |
| <b>Health status</b>                   |                   |                   |                   |                   |
| <b>Physical conditions<sup>‡</sup></b> |                   |                   |                   |                   |
| Yes                                    | 1.32 (1.26, 1.37) | 1.18 (1.13, 1.23) | 1.17 (1.12, 1.22) | 1.18 (1.13, 1.23) |
| No                                     | 1.00              | 1.00              | 1.00              | 1.00              |
| <b>Disability level</b>                |                   |                   |                   |                   |
| High <sup>¶</sup>                      | 1.78 (1.71, 1.86) | 1.52 (1.45, 1.59) | 1.51 (1.44, 1.57) | 1.48 (1.42, 1.55) |
| Low                                    | 1.00              | 1.00              | 1.00              | 1.00              |
| <b>Psychiatric conditions</b>          |                   |                   |                   |                   |
| <b>Past-year MDD</b>                   |                   |                   |                   |                   |
| Yes                                    | 1.34 (1.22, 1.48) |                   | 1.34 (1.22, 1.48) | 1.33 (1.21, 1.46) |
| No                                     | 1.00              |                   | 1.00              | 1.00              |
| <b>Lifestyle</b>                       |                   |                   |                   |                   |
| <b>Physical activity</b>               |                   |                   |                   |                   |
| Active <sup>‡</sup>                    | 1.00              |                   |                   | 1.00              |
| Inactive                               | 1.27 (1.21, 1.33) |                   |                   | 1.04 (1.00, 1.09) |
| <b>Smoking status</b>                  |                   |                   |                   |                   |
| Current smoker                         | 1.60 (1.49, 1.72) |                   |                   | 1.51 (1.41, 1.62) |
| Former smoker                          | 1.33 (1.27, 1.39) |                   |                   | 1.13 (1.08, 1.18) |

|                       |                   |                   |
|-----------------------|-------------------|-------------------|
| Never smoker          | 1.00              | 1.00              |
| <b>Alcohol intake</b> |                   |                   |
| High <sup>α</sup>     | 0.88 (0.85, 0.92) | 0.92 (0.88, 0.96) |
| Low                   | 1.00              | 1.00              |

355

356

<sup>1</sup> Model A: adjusted for sociodemographics (age, sex, education, marital status, social class, employment), physical conditions, disability

357

358

<sup>2</sup> Model B: adjusted for sociodemographics, physical conditions, disability, MDD

359

360

<sup>3</sup> Model C: adjusted for sociodemographics, physical conditions, disability, MDD, physical activity, smoking, alcohol

361

362

<sup>‡</sup> High education: O-level, A-level, degree; low education: refers to no education

363

<sup>\*</sup> Other: divorced, separated, widowed

364

<sup>+</sup> Physical conditions: respiratory disease (asthma and bronchitis), allergies and hay fever, stroke, heart attack, cancer, diabetes, thyroid conditions, arthritis

365

366

<sup>¶</sup> Below the median PCS value of 50.6

367

<sup>‡</sup> Moderately inactive, moderately active, active

368

<sup>α</sup> 3+ units of alc./week (1 pint beer=2 units, 1 glass wine=1 unit, 1 glass sherry=1 unit, 1 glass spirits=1 unit)

369

370

1  
2  
3 371 After adjustment for sociodemographic variables, physical conditions, and disability, GAD  
4 372 was associated with a 25% higher incidence rate of hospitalization (IRR=1.25, 95% CI: 1.09,  
5 373 1.43). The incidence rate ratio was somewhat attenuated and became statistically non-  
6 374 significant after further adjustment for MDD (IRR=1.10, 95% CI 0.96, 1.27). The effect  
7 375 estimate approached the null after additional adjustment for behaviour risk factors  
8 376 (IRR=1.04, 95% CI: 0.90, 1.20). Finally, we did multiple imputations for missing data  
9 377 (Appendix II). The effect estimate remained the same when we imputed all covariates  
10 378 except for GAD (IRR: 1.04, 95% CI: 1.02, 1.06). The effect estimate remained virtually  
11 379 unchanged when we imputed all covariates including GAD (IRR: 1.05, 95% CI: 1.03, 1.08).  
12  
13  
14  
15  
16  
17  
18  
19  
20  
21  
22  
23  
24  
25  
26  
27  
28  
29  
30  
31  
32  
33  
34  
35  
36  
37  
38  
39  
40  
41  
42  
43  
44  
45  
46  
47  
48  
49  
50  
51  
52  
53  
54  
55  
56  
57  
58  
59  
60

380

381

382 Next, we assessed whether risk for hospital admissions varied by frequency of GAD lifetime  
383 episodes, anxiety episode chronicity, GAD age of onset, and whether the hospitalization risk  
384 was higher in those with psychiatric comorbidity (with MDD) (table 4). Results are based on  
385 fully-adjusted models.

386

387 **Table 4: Associations between different forms of GAD reported in 1996-2000 and non-**  
 388 **psychiatric hospital admissions in 1999/00-2009 in 17,939 British people ages 40+**  
 389

| Characteristic                         | IRR and 95% CI                 |                                |                                |                                |
|----------------------------------------|--------------------------------|--------------------------------|--------------------------------|--------------------------------|
| <b>GAD type</b>                        |                                |                                |                                |                                |
| <b>Frequent GAD</b>                    |                                |                                |                                |                                |
| Yes <sup>a</sup>                       | 1.07 (0.91, 1.27) <sup>e</sup> |                                |                                |                                |
| No                                     | 1.00                           |                                |                                |                                |
| <b>Chronic GAD</b>                     |                                |                                |                                |                                |
| Yes <sup>b</sup>                       |                                | 1.07 (0.85, 1.35) <sup>e</sup> |                                |                                |
| No                                     |                                | 1.00                           |                                |                                |
| <b>Early age GAD onset</b>             |                                |                                |                                |                                |
| Yes <sup>c</sup>                       |                                |                                | 1.16 (0.95, 1.41) <sup>e</sup> |                                |
| No                                     |                                |                                | 1.00                           |                                |
| <b>Comorbid GAD</b>                    |                                |                                |                                |                                |
| Yes <sup>d</sup>                       |                                |                                |                                | 1.23 (1.02, 1.49) <sup>e</sup> |
| No                                     |                                |                                |                                | 1.00                           |
| <b>Socio-demographics</b>              |                                |                                |                                |                                |
| <b>Age</b>                             |                                |                                |                                |                                |
| Per 10 years                           | 1.22 (1.18, 1.25)              | 1.21 (1.18, 1.25)              | 1.22 (1.18, 1.25)              | 1.21 (1.17, 1.25)              |
| <b>Sex</b>                             |                                |                                |                                |                                |
| Women                                  | 0.78 (0.74, 0.81)              | 0.78 (0.74, 0.81)              | 0.78 (0.74, 0.81)              | 0.78 (0.75, 0.82)              |
| Men                                    | 1.00                           | 1.00                           | 1.00                           | 1.00                           |
| <b>Education<sup>‡</sup></b>           |                                |                                |                                |                                |
| Low                                    | 1.10 (1.06, 1.16)              | 1.11 (1.06, 1.16)              | 1.10 (1.06, 1.16)              | 1.12 (1.07, 1.18)              |
| High                                   | 1.00                           | 1.00                           | 1.00                           | 1.00                           |
| <b>Marital status</b>                  |                                |                                |                                |                                |
| Single                                 | 0.84 (0.76, 0.94)              | 0.84 (0.76, 0.94)              | 0.84 (0.76, 0.94)              | 0.83 (0.74, 0.93)              |
| Married                                | 1.00                           | 1.00                           | 1.00                           | 1.00                           |
| Other <sup>*</sup>                     | 1.10 (1.03, 1.16)              | 1.09 (1.03, 1.16)              | 1.09 (1.03, 1.16)              | 1.03 (0.97, 1.10)              |
| <b>Social class</b>                    |                                |                                |                                |                                |
| Manual                                 | 1.21 (1.16, 1.26)              | 1.21 (1.16, 1.26)              | 1.21 (1.16, 1.26)              | 1.21 (1.16, 1.27)              |
| Non-manual                             | 1.00                           | 1.00                           | 1.00                           | 1.00                           |
| <b>Employment</b>                      |                                |                                |                                |                                |
| Yes                                    | 1.00                           | 1.00                           | 1.00                           | 1.00                           |
| No                                     | 1.15 (1.09, 1.21)              | 1.15 (1.09, 1.21)              | 1.15 (1.09, 1.21)              | 1.17 (1.11, 1.24)              |
| <b>Health status</b>                   |                                |                                |                                |                                |
| <b>Physical conditions<sup>+</sup></b> |                                |                                |                                |                                |
| Yes                                    | 1.17 (1.13, 1.23)              | 1.17 (1.13, 1.23)              | 1.17 (1.13, 1.23)              | 1.17 (1.12, 1.22)              |
| No                                     | 1.00                           | 1.00                           | 1.00                           | 1.00                           |
| <b>Disability level</b>                |                                |                                |                                |                                |
| High <sup>¶</sup>                      | 1.48 (1.42, 1.55)              | 1.48 (1.42, 1.55)              | 1.48 (1.42, 1.55)              | 1.48 (1.42, 1.55)              |
| Low                                    | 1.00                           | 1.00                           | 1.00                           | 1.00                           |
| <b>Psychiatric conditions</b>          |                                |                                |                                |                                |

|                          |                   |                   |                   |                   |
|--------------------------|-------------------|-------------------|-------------------|-------------------|
| <b>Past-year MDD</b>     |                   |                   |                   |                   |
| Yes                      | 1.32 (1.20, 1.45) | 1.33 (1.22, 1.46) | 1.33 (1.21, 1.46) | --                |
| No                       | 1.00              | 1.00              | 1.00              |                   |
| <b>Lifestyle</b>         |                   |                   |                   |                   |
| <b>Physical activity</b> |                   |                   |                   |                   |
| Active <sup>‡</sup>      | 1.00              | 1.00              | 1.00              | 1.02 (0.97, 1.07) |
| Inactive                 | 1.04 (1.00, 1.09) | 1.04 (1.00, 1.09) | 1.04 (1.00, 1.09) | 1.00              |
| <b>Smoking status</b>    |                   |                   |                   |                   |
| Current smoker           | 1.51 (1.41, 1.62) | 1.51 (1.41, 1.62) | 1.51 (1.41, 1.62) | 1.56 (1.45, 1.68) |
| Former smoker            | 1.13 (1.08, 1.18) | 1.13 (1.08, 1.18) | 1.13 (1.08, 1.18) | 1.14 (1.09, 1.19) |
| Never smoker             | 1.00              | 1.00              | 1.00              | 1.00              |
| <b>Alcohol intake</b>    |                   |                   |                   |                   |
| High <sup>¶</sup>        | 0.92 (0.88, 0.96) | 0.92 (0.88, 0.96) | 0.92 (0.88, 0.96) | 0.93 (0.89, 0.98) |
| Low                      | 1.00              | 1.00              | 1.00              | 1.00              |

390

391

<sup>a</sup> 3+ episodes of lifetime GAD

392

<sup>b</sup> GAD episodes lasted at least 6 months

393

<sup>c</sup> GAD developed before 30 years of age

394

<sup>d</sup> GAD-MDD comorbidity

395

<sup>e</sup> Adjusted for sociodemographics, physical conditions, disability, MDD, physical activity, smoking, alcohol

396

397

<sup>‡</sup> High education: O-level, A-level, degree; low education: refers to no education

398

<sup>\*</sup> Other: divorced, separated, widowed

399

<sup>†</sup> Physical conditions: respiratory disease (asthma and bronchitis), allergies and hay fever, stroke, heart attack, cancer, diabetes, thyroid conditions, arthritis

400

<sup>¶</sup> Below the median PCS value of 50.6

401

402

<sup>‡</sup> Moderately inactive, moderately active, active

403

<sup>¶</sup> 3+ units of alc./week (1 pint beer=2 units, 1 glass wine=1 unit, 1 glass sherry=1 unit, 1 glass spirits=1 unit)

404

404

1  
2  
3 405 People with more than 3 lifetime episodes had a somewhat higher risk of hospitalization  
4 406 (IRR=1.07, 95% CI: 0.91, 1.27). Those whose episodes lasted, on average, 6 months or  
5 407 longer also had a slight increased risk for admissions compared to those with shorter  
6 408 episodes (IRR=1.07, 95% CI: 0.85, 1.35). People who developed GAD before 30 years of age  
7 409 were 16% more likely to be admitted to the hospital than those who developed it later in  
8 410 life (IRR=1.16, 95% CI: 0.95, 1.41), although this finding was not statistically significant.  
9 411 Finally, we determined whether GAD comorbid with MDD is associated with non-psychiatric  
10 412 hospital admissions. Results showed that people with GAD-MDD comorbidity had a 23%  
11 413 higher chance of being admitted to hospital than people without comorbidity – this  
12 414 association was statistically significant (IRR: 1.23 ,95% CI: 1.02, 1.49).  
13  
14  
15  
16  
17  
18  
19  
20  
21  
22  
23  
24  
25  
26  
27  
28  
29  
30  
31  
32  
33  
34  
35  
36  
37  
38  
39  
40  
41  
42  
43  
44  
45  
46  
47  
48  
49  
50  
51  
52  
53  
54  
55  
56  
57  
58  
59  
60



## DISCUSSION

416  
417  
418 This is the first study to assess the association between GAD and hospital service use in a  
419 population-based cohort. This longitudinal study showed that having an episode of GAD in  
420 the past year was not independently associated with hospital admissions during the  
421 subsequent nine years. Chronic GAD (at least 6 months), frequent GAD (at least 3 lifetime  
422 episodes), and anxiety with an early age of onset (before 30 years) did not show statistically  
423 significant associations with non-psychiatric hospitalizations. In contrast, people with GAD  
424 and MDD comorbidity were at an increased risk of being admitted to hospital than those  
425 without MDD comorbidity. The association between GAD-MDD comorbidity and non-  
426 psychiatric hospital admissions was statistically significant.

427  
428 People with past-year GAD were more likely to have medical conditions; nonetheless,  
429 including these covariates in the model left the association between past-year GAD and  
430 hospital admissions statistically significant. It was only when MDD was introduced in the  
431 model as a potential confounder that any remaining association with hospital service  
432 utilization was explained away.

### 434 **Strengths and limitations**

435  
436 There are several strengths associated with our study. We had a large, population-based  
437 sample of middle- and older-aged adults and adequately adjusted for a range of possible  
438 confounders. We used a structured questionnaire to assess past-year GAD according to  
439 DSM-IV criteria, used large administrative health databases to examine hospital service use  
440 (avoiding the self-reporting bias found in questionnaire studies), and participants were  
441 followed for a long time. We had a large list of self-reported physician diagnoses of chronic  
442 diseases that we used to ascertain medical histories. Despite this, the residual effect of  
443 diseases not captured by our study, but that are associated with GAD may be present. Past  
444 illness may have been underreported, which may have introduced measurement error and  
445 further attenuated effect estimates towards the null. A negligible proportion of participants  
446 may have obtained care at private facilities, which might have led to non-differential  
447 misclassification. The databases used in this study also did not capture admissions to

1  
2  
3 448 hospitals outside the UK. However, migration in the EPIC-Norfolk cohort is minimal and  
4  
5 449 does not present a problem.

6  
7 450

8 451 We may have overadjusted our models with the inclusion of self-evaluated impairment, as  
9  
10 452 this may be part of the expression of psychiatric illness. This can lead to attenuation of  
11  
12 453 effect estimates. If participants chose not to answer certain questions in the HLEQ, this  
13  
14 454 contributed to missing data; however, to avoid biasing the findings, we retained participants  
15  
16 455 for whom we had complete data on all covariates. Non-participation in our study also may  
17  
18 456 have led to non-differential misclassification and further attenuation of effect estimates.

19 457

20 458 Another limitation is that we did not have data on primary care service use. Merging  
21  
22 459 population cohorts, such as ours, with primary care service administrative databases and  
23  
24 460 hospitalization databases would have provided a more complete picture of the burden of  
25  
26 461 GAD on the health care system.

27  
28 462

29 463 This study was conducted on people ages 40 years and older and may not be generalizable  
30  
31 464 to younger age groups. We suspect that the strength of the association between GAD-MDD  
32  
33 465 comorbidity and non-psychiatric hospital admissions is weaker for younger populations who  
34  
35 466 are typically healthier than older people. Although young people have a high burden of  
36  
37 467 mental health problems[40, 44], they (especially adolescents) are less likely to have non-  
38  
39 468 psychiatric hospitalizations than older people[45]. It could take many years until the effects  
40  
41 469 of anxiety comorbid with depression accumulate and manifest as poor physical health, thus  
42  
43 470 translating into higher use of non-psychiatric hospital services. As such, we would expect  
44  
45 471 the strength of the association between GAD-MDD comorbidity and hospitalizations to be  
46  
47 472 weaker in young people, however, future studies should investigate this.

47 473

48  
49 474 Participants were required to complete detailed dietary and lifestyle questionnaires and  
50  
51 475 undergo periodic health assessments. Because those who participated in EPIC-Norfolk were  
52  
53 476 more affluent and healthier than individuals living in other parts of England, our results may  
54  
55 477 not generalize to people living in extremely deprived areas.

56 478  
57  
58  
59  
60

1  
2  
3 479 Finally, there was missing data in this study. When we conducted multiple imputations for  
4 480 missing data, the effect estimate of our main analysis remained unchanged.  
5  
6

7 481

### 8 482 **Comparison with other studies**

9 483

10  
11 484 Most of the studies assessing the link between psychiatric disorders and non-psychiatric  
12 485 health service utilization have focused on depression and, to a lesser extent, panic disorder  
13 486 and PTSD, while other anxiety disorders have been significantly underresearched. Most of  
14 487 the studies on depression as a stand alone measure have shown an association with health  
15 488 service use in both clinical and community samples.[46] There are substantially fewer  
16 489 studies on anxiety, and a number of these have shown positive associations with health  
17 490 service use. A US study[47] that recruited patients from an outpatient clinic showed that  
18 491 anxiety disorders were linked to higher utilization of primary care services compared to  
19 492 depressive or addictive disorders. Patients, however, were recruited from an outpatient  
20 493 clinic located in a predominantly rural area, which might have affected generalizability.  
21 494 Another study showed anxiety disorders to be associated with a higher number of  
22 495 consultations in general medical, emergency and specialty settings, such as cardiology and  
23 496 dermatology.[48] In this study, people were sampled from an anxiety clinic, thereby leading  
24 497 to possible selection bias. Other studies showed PTSD and GAD to be associated with health  
25 498 care use, however, this research was based on highly-select samples that have limited  
26 499 generalizability.[26, 28, 49, 50] In contrast to the literature, a major strength of our study  
27 500 was that it was population-based. There is also a lack of research assessing whether  
28 501 different forms of the disorder contribute to even higher health service use rates (comorbid  
29 502 cases are typically the most severe, hardest to treat and with the poorest prognosis [9]).  
30  
31  
32  
33  
34  
35  
36  
37  
38  
39  
40  
41  
42  
43  
44

45 503

### 46 504 **Mechanisms**

47 505

48  
49  
50 506 A more severe course of GAD can lead to higher rates of health services because of  
51 507 unhealthy behaviours, such as smoking and alcohol (which we controlled for in our  
52 508 analyses). It could also be that a more severe form of anxiety, such as GAD-MDD  
53 509 comorbidity is associated with poorer underlying health, which then leads to higher health  
54 510 service use rates. Although we controlled for several chronic diseases, we might have  
55  
56  
57  
58  
59  
60

1  
2  
3 511 missed some conditions that are associated with GAD-MDD comorbidity and  
4 512 hospitalizations. A third explanation for higher health service use in those with comorbid  
5 513 anxiety and depression could relate to inflammatory pathways. If clinically apparent signs of  
6 514 disease have not yet developed in those with psychiatric comorbidity or are at an early,  
7 515 undetectable stage, it will not be possible to measure these factors and adjust for them in  
8 516 analyses.  
9  
10  
11  
12

13 517

14 518 **Implications**

15 519

16 520 GAD is a debilitating and impairing condition.[9] The evidence base on its association with  
17 521 health services is small and confined to clinical settings with the potential for self-selection  
18 522 bias. Our study overcomes many limitations of previous studies, and clarifies that individual  
19 523 episodes of GAD measured at a single point in time (ex. in the past year) are not associated  
20 524 with health service use. Instead, it shows that cases that are comorbid with depression can  
21 525 lead to increased use of hospital services, after controlling for a range of important  
22 526 confounders. In this study, GAD-MDD comorbidity was associated with a statistically  
23 527 significantly increased risk of hospital admissions.  
24  
25  
26  
27  
28  
29  
30  
31  
32

33 528

34 529 Population-based research on anxiety is lacking, and thus far, no studies have assessed the  
35 530 association between GAD and non-psychiatric hospitalization. Clinicians should consider  
36 531 that it is not just the diagnosis of the individual disorder at one point in time (ex. past-year  
37 532 GAD) that is predictive of deleterious health outcomes; different forms of the disorder may  
38 533 also be important. GAD has a waxing and waning course throughout a patient's life, and  
39 534 many of those affected experience relapse after psychiatric treatment or develop  
40 535 psychiatric comorbidities.  
41  
42  
43  
44  
45  
46  
47  
48

49 536

50 537 Our findings are important for clinicians and policy-makers. Large numbers of people are  
51 538 affected by anxiety-depression comorbidity [9]. As such, clinicians should consider more  
52 539 widespread screening for mental health problems and if appropriate, the examination of  
53 540 any underlying health conditions that may require treatment in order to prevent future  
54 541 hospital admissions. Policy-makers should also consider rolling out more widespread  
55 542 anxiety and depression prevention and screening programmes.  
56  
57  
58  
59  
60

1  
2  
3 543

4 544 Future research, however needs to examine the reasons for the increased non-psychiatric  
5  
6 545 hospital service use in those with GAD-MDD comorbidity (this can provide additional insight  
7  
8 546 into clinical recommendations). To provide a better understanding of the links between  
9  
10 547 mental and physical health, the bidirectional links between anxiety and physical health  
11  
12 548 problems should also be examined. Finally, future research should merge a population-  
13  
14 549 based cohort with primary and secondary care administrative health databases to provide a  
15  
16 550 more complete picture of the burden of different forms of anxiety on the health care  
17  
18 551 system.

19 552

20  
21 553 **Conclusion**

22 554

23  
24 555 People with GAD that was comorbid with MDD had a higher risk for hospital admissions  
25  
26 556 over 9 years between 1996-1999/00 and 2009 in the European Prospective Investigation of  
27  
28 557 Cancer in Norfolk study.

1  
2  
3 558 Acknowledgements: OR received a PhD studentship from the National Institute for Health  
4 559 Research.

5  
6 560  
7

8 561 Competing interest: All authors have completed the ICMJE uniform disclosure form at  
9 562 [www.icmje.org/coi\\_disclosure.pdf](http://www.icmje.org/coi_disclosure.pdf) and declare: no support from any organisation for the  
10 563 submitted work; no financial relationships with any organizations that might have an  
11 564 interest in the submitted work in the previous three years; no other relationships or  
12 565 activities that could appear to have influenced the submitted work.  
13  
14  
15  
16

17 566

18  
19 567 Funding: This work was supported by the Medical Research Council UK (grant number  
20 568 SP2024-0201 and SP2024-0204) and Cancer Research UK (grant number G9502233).  
21

22 569  
23

24 570 Author contributions: OR (corresponding author) had the idea for and conducted the  
25 571 analysis, and wrote the article. CB critically reviewed drafts of the manuscript, KK edited  
26 572 versions of the paper; PS and NW provided feedback into the analysis. OR, CB, KK, LL, PS,  
27 573 and NW contributed to the interpretation of data for the work, agreed to be accountable for  
28 574 all aspects of the work, gave final approval of the version to be published, and made  
29 575 substantial contributions to the analysis and interpretation of data. OR, CB, KK, LL, PS, and  
30 576 NW have seen and approved the final version. OR, CB, KK, LL, PS, and NW had full access to  
31 577 all the data in the study and take responsibility for the integrity of the data and the accuracy  
32 578 of the data analysis. OR acts as guarantor of the study.  
33  
34  
35  
36  
37  
38  
39

40 579

41  
42 580 Transparency declaration: OR affirms that the manuscript is an honest, accurate, and  
43 581 transparent account of the study being reported; that no important aspects of the study  
44 582 have been omitted; and that any discrepancies from the study as planned have been  
45 583 explained.  
46  
47  
48

49 584

50  
51 585 Role of study sponsors and statement of independence: The funding sources had no role in  
52 586 the design and conduct of the study; collection, management, analysis, and interpretation of  
53 587 the data; and preparation, review, or approval of the manuscript.  
54  
55

56 588  
57  
58  
59  
60

1  
2  
3 589 Ethical approval: The study has ethics committee approval from Norfolk Ethics Committee  
4  
5 590 (Rec Ref: 98CN01) and all participants gave informed consent.

6  
7 591 Data sharing: No additional data available. Original dataset requests should be sent to the  
8  
9 592 corresponding author. Please contact O Remes at [or260@medschl.cam.ac.uk](mailto:or260@medschl.cam.ac.uk) for questions  
10  
11 593 about the statistical code.

12 594

13  
14 595 Copyright: "The Corresponding Author has the right to grant on behalf of all authors and  
15  
16 596 does grant on behalf of all authors, a worldwide licence to the Publishers and its licensees in  
17  
18 597 perpetuity, in all forms, formats and media (whether known now or created in the future),  
19  
20 598 to i) publish, reproduce, distribute, display and store the Contribution, ii) translate the  
21  
22 599 Contribution into other languages, create adaptations, reprints, include within collections  
23  
24 600 and create summaries, extracts and/or, abstracts of the Contribution, iii) create any other  
25  
26 601 derivative work(s) based on the Contribution, iv) to exploit all subsidiary rights in the  
27  
28 602 Contribution, v) the inclusion of electronic links from the Contribution to third party  
29  
30 603 material where-ever it may be located; and, vi) licence any third party to do any or all of the  
31  
32 604 above."

33  
34  
35  
36  
37  
38  
39  
40  
41  
42  
43  
44  
45  
46  
47  
48  
49  
50  
51  
52  
53  
54  
55  
56  
57  
58  
59  
60

## 606 REFERENCES

- 607
- 608 1. American Psychiatric Association. (1994). *Diagnostic and Statistical Manual of*
- 609 *Mental Disorders* (4<sup>th</sup> edn). Washington, DC: APA.
- 610 2. Whiteford HA, Degenhardt, Rehm J, et al. Global burden of disease attributable to
- 611 mental and substance use disorders: findings from the global burden of disease
- 612 study 2010. *Lancet* 2013;13:1575-86 doi: [http://dx.doi.org/10.1016/S0140-](http://dx.doi.org/10.1016/S0140-6736(13)61611-6)
- 613 [6736\(13\)61611-6](http://dx.doi.org/10.1016/S0140-6736(13)61611-6).
- 614 3. Greenberg PE, Sisitsky T, Kessler RC, et al. The economic burden of anxiety disorders
- 615 in the 1990s. *J Clin Psychiatry* 1999;60:427-35.
- 616 4. Kroenke K, Spitzer RL, Williams JB, et al. Anxiety disorders in primary care:
- 617 prevalence, impairment, comorbidity, and detection. *Ann Intern Med* 2007;146:317-
- 618 25 doi: [10.7326/0003-4819-146-5-200703060-00004](https://doi.org/10.7326/0003-4819-146-5-200703060-00004).
- 619 5. Comer JS, Blanco C, Hasin DS, et al. Health-related quality of life across the anxiety
- 620 disorders. *J Clin Psychiatry* 2011;72:43–50 doi: [10.4088/JCP.09m05094blu](https://doi.org/10.4088/JCP.09m05094blu) [published
- 621 Online First 24 August 2010].
- 622 6. Tyrer P, Baldwin D. Generalised anxiety disorder. *Lancet* 2006;16:2156–66 doi:
- 623 [http://dx.doi.org/10.1016/S0140-6736\(06\)69865-6](http://dx.doi.org/10.1016/S0140-6736(06)69865-6).
- 624 7. Hoge E, Ivkovic A, Fricchione G. Generalized anxiety disorder: diagnosis and
- 625 treatment. *BMJ* 2012;345:e7500 doi: <https://doi.org/10.1136/bmj.e7500>.
- 626 8. Revicki DA, Travers K, Wyrwich KW. Humanistic and economic burden of generalized
- 627 anxiety disorder in North America and Europe. *J Affect Disord* 2012;140:103–12 doi:
- 628 [10.1016/j.jad.2011.11.014](https://doi.org/10.1016/j.jad.2011.11.014) [published Online First 9 December 2011].
- 629 9. Simpson HB, Neria Y, Lewis-Fernandez R, et al. Anxiety disorders. Theory, research
- 630 and clinical perspectives. New York, US: Cambridge University Press 2010.
- 631 10. Combs H, Markman J. Anxiety disorders in primary care. *Med Clin North Am*
- 632 2014;98:1007-23 doi: [10.1016/j.mcna.2014.06.003](https://doi.org/10.1016/j.mcna.2014.06.003) [published Online First 11 July
- 633 2014].
- 634 11. Buszewicz MJ, Chew-Graham C. Improving the detection and management of anxiety
- 635 disorders in primary care. *Br J Gen Pract* 2011;61:489-490 doi:
- 636 [10.3399/bjgp11X588259](https://doi.org/10.3399/bjgp11X588259).



- 1  
2  
3 637 12. Wittchen H-U, Muhlig S, Beesdo K. Mental disorders in primary care. *Dialogues Clin*  
4 638 *Neurosci* 2003;5:115-128.  
5  
6 639 13. Schoepf D, Heun R. Anxiety disorders and physical comorbidity: increased prevalence  
7 640 but reduced relevance of specific risk factors for hospital-based mortality during a  
8 641 12.5-year observation period in general hospital admissions. *Eur Arch Psychiatry Clin*  
9 642 *Neurosci* 2015;265:387-98 doi: 10.1007/s00406-014-0566-9 [published Online First 4  
10 643 December 2014].  
11  
12 644 14. Player MS, Peterson LE. Anxiety disorders, hypertension, and cardiovascular risk: a  
13 645 review. *Int J Psychiatry Med* 2011;41:365-377 doi: <https://doi.org/10.2190/PM.41.4.f>  
14 646 [published Online First 26 October 2011].  
15  
16 647 15. de Waal MW, Arnold IA, Eekhof JA, van Hemert AM. Somatoform disorders in  
17 648 general practice: prevalence, functional impairment and comorbidity with anxiety  
18 649 and depressive disorders. *Br J Psychiatry* 2004;184:470-6 doi: 10.1192/bjp.184.6.470  
19 650 [published Online First 1 June 2004].  
20  
21 651 16. Shen CC, Hu YW, Hu LY, et al. The risk of cancer in patients with generalized anxiety  
22 652 disorder: a nationwide population-based study. *PloS One* 2013;e57399 doi:  
23 653 10.1371/journal.pone.0057399 [published Online First 27 February 2013].  
24  
25 654 17. Janszky I, Ahnve S, Lundberg I, Hemmingsson T. Early-onset depression, anxiety, and  
26 655 risk of subsequent coronary heart disease: 37-year follow-up of 49,321 young  
27 656 Swedish men. *J Am Coll Cardiol* 2010;56:31-37. doi:  
28 657 <https://doi.org/10.1016/j.jacc.2010.03.033> [published Online First 22 June 2010].  
29  
30 658 18. Gale CR, Batty GD, Osborn DP, et al. Mental disorders across the adult life course and  
31 659 future coronary heart disease: evidence for general susceptibility. *Circulation*  
32 660 2014;129:186-93 doi: 10.1161/CIRCULATIONAHA [published Online First 4 November  
33 661 2013].  
34  
35 662 19. Carter RM, Wittchen HU, Pfister H, Kessler RC. One-year prevalence of subthreshold  
36 663 and threshold DSM-IV generalized anxiety disorder in a nationally representative  
37 664 sample. *Depress Anxiety* 2001;13:78-88.  
38  
39 665 20. Lamers F, van Oppen P, Comijs HC, et al. Comorbidity patterns of anxiety and  
40 666 depressive disorders in a large cohort study: the Netherlands Study of Depression  
41 667 and Anxiety (NESDA). *J Clin Psychiatry* 2011;72:341-8 doi: 10.4088/JCP.10m06176blu  
42 668 [published Online First 25 January 2011].  
43  
44  
45  
46  
47  
48  
49  
50  
51  
52  
53  
54  
55  
56  
57  
58  
59  
60

1  
2  
3  
4  
5  
6  
7  
8  
9  
10  
11  
12  
13  
14  
15  
16  
17  
18  
19  
20  
21  
22  
23  
24  
25  
26  
27  
28  
29  
30  
31  
32  
33  
34  
35  
36  
37  
38  
39  
40  
41  
42  
43  
44  
45  
46  
47  
48  
49  
50  
51  
52  
53  
54  
55  
56  
57  
58  
59  
60

- 669 21. Johansson R, Carlbring P, Heedman A, Paxling B, Andersson G. Depression, anxiety  
670 and their comorbidity in the Swedish general population: point prevalence and the  
671 effect on health-related quality of life. *Peer J* 2013;1:e98 doi: 10.7717/peerj.98  
672 [published Online First 9 July 2013].
- 673 22. Hamalainen J, Isometsa E, Sihvo S, Pirkola S, Kiviruusu O. Use of health services for  
674 major depressive and anxiety disorders in Finland. *Depress Anxiety* 2008;25:27-37  
675 doi: 10.1002/da.20256 [published Online First 19 January 2007].
- 676 23. Maj M. 'Psychiatric comorbidity': an artefact of current diagnostic systems. *Br J*  
677 *Psychiatry* 2005;186:182-84 doi: 10.1192/bjp.186.3.182 [published Online First 28  
678 February 2005].
- 679 24. Stein MB. Public health perspectives on generalized anxiety disorder. *J Clin*  
680 *Psychiatry* 2004;65:3-7.
- 681 25. Nutt D, Argyropoulos S, Hood S, et al. Generalized anxiety disorder: a comorbid  
682 disease. *Eur Neuropsychopharmacol* 2006;16:S109-18 doi:  
683 10.1016/j.euroneuro.2006.04.003 [published Online First 5 June 2006].
- 684 26. Porensky EK, Dew MA, Karp JF, et al. The burden of late-life generalized anxiety  
685 disorder: effects on disability, health-related quality of life, and healthcare  
686 utilization. *Am J Geriatr Psychiatry* 2009;17:473-82 [published Online First 30 July  
687 2012].
- 688 27. Munk-Jorgensen P, Allgulander C, Dahl AA, et al. Prevalence of generalized anxiety  
689 disorder in general practice in Denmark, Finland, Norway, and Sweden. *Psychiatr*  
690 *Serv* 2006;57(17):1738-44 doi: 10.1176/ps.2006.57.12.1738 [published Online First 28  
691 February 2005].
- 692 **28.** Belanger L, Ladouceur R, Morin CM. Generalized anxiety disorder and health care  
693 use. *Can Fam Physician* 2005;51:1362-3.
- 694 29. Wittchen HU, Kessler RC, Beesdo K, et al. Generalized anxiety and depression in  
695 primary care: prevalence, recognition, and management. *J Clin Psychiatry*  
696 2002;63:24.
- 697 30. Day N, Oakes S, Luben R, et al. EPIC-Norfolk: study design and characteristics of the  
698 cohort. European Prospective Investigation of Cancer. *Br J Cancer* 1999;80:95-103.
- 699 31. Hayat SA, Luben R, Keevil VL, et al. Cohort profile: a prospective cohort study of  
700 objective physical and cognitive capability and visual health in an ageing population

- 1  
2  
3 701 of men and women in Norfolk (EPIC-Norfolk 3). *Int J Epidemiol* 2014;43:1063-72 doi:  
4 702 10.1093/ije/dyt086 [published Online First 14 June 2013].  
5  
6 703 32. Surtees P, Wainwright N, Khaw K, et al. Functional health status, chronic medical  
7 704 conditions and disorders of mood. *Br J Psychiatry* 2003;183:299–303 doi:  
8 705 10.1192/bjp.183.4.299 [published Online First 30 September 2003].  
9  
10 706 33. Leng Y, Wainwright NWJ, Cappuccio FP, et al. Daytime napping and the risk of all-  
11 707 cause and cause-specific mortality: a 13-year follow-up of a British population. *Am J*  
12 708 *Epidemiol* 2014;179:1115-1124 doi: <https://doi.org/10.1093/aje/kwu036> [published  
13 709 Online First 30 March 2014].  
14  
15 710 34. Leng Y, Wainwright NWJ, Cappuccio FP, et al. Self-reported sleep patterns in a British  
16 711 population cohort. *Sleep Med* 2014;15:295-302 doi: 10.1016/j.sleep.2013.10.015.  
17  
18 712 35. Leng Y, Wainwright NW, Cappuccio FP, et al. Daytime napping and increased risk of  
19 713 incident respiratory diseases: symptom, marker, or risk factor? *Sleep Med*  
20 714 2016;23:12-15 doi: 10.1016/j.sleep.2016.06.012 [published Online First 12 July  
21 715 2016].  
22  
23 716 36. Shohaimi S, Luben R, Wareham N, et al. Residential area deprivation predicts  
24 717 smoking habit independently of individual educational level and occupational social  
25 718 class. A cross sectional study in the Norfolk cohort of the European Prospective  
26 719 Investigation into Cancer (EPIC-Norfolk). *J Epidemiol Community Health* 2003;57:270-  
27 720 276 doi: 10.1136/jech.57.4.270.  
28  
29 721 37. Myint PK, Surtees PG, Wainwright NW, et al. Physical health-related quality of life  
30 722 predicts stroke in the EPIC-Norfolk. *Neurology* 2007;69:2243-8 doi:  
31 723 10.1212/01.wnl.0000296010.21252.78.  
32  
33 724 38. Elias P, Halstead K, Prandy K. CASOC: Computer-assisted standard occupational  
34 725 coding. London, England: HMSO 1993.  
35  
36 726 39. Surtees PG, Wainwright NWJ, Brayne C. Psychosocial aetiology of chronic disease: a  
37 727 pragmatic approach to the assessment of lifetime affective morbidity in an EPIC  
38 728 component study. *J Epidemiol Community Health* 2000;54:114-122 doi:  
39 729 10.1136/jech.54.2.114.  
40  
41 730 40. Remes O, Brayne C, Van der Linde R, et al. A systematic review of reviews on the  
42 731 prevalence of anxiety disorders in adult populations. *Brain Behav* 2016;6:e00497 doi:  
43 732 10.1002/brb3.497 [published Online First 5 June 2016].  
44  
45  
46  
47  
48  
49  
50  
51  
52  
53  
54  
55  
56  
57  
58  
59  
60

- 1  
2  
3 733 41. Ware JE, Snow K, Kosinski M, et al. New England Medical Center Hospital. Health  
4 734 Institute. SF-36 Health Survey: Manual and Interpretation Guide. The Health  
5 735 Institute; Boston, MA: New England Medical Center 1993.
- 6  
7  
8 736 42. Lakshman R, McConville A, How S, et al. Association between area level socio-  
9 737 economic deprivation and a cluster of behavioural risk factors: Cross sectional,  
10 738 population based study. *J Public Health (Oxf)* 2011;33:234-245. doi:  
11 739 10.1093/pubmed/fdq072 [published Online First 29 September 2010].
- 12  
13  
14 740 43. Vetter S, Endrass J, Schweizer I, et al. The effects of economic deprivation on  
15 741 psychological well-being among the working population of Switzerland. *BMC Public*  
16 742 *Health* 2006;6:223. doi: 10.1186/1471-2458-6-223 [published Online First 4  
17 743 September 2006].
- 18  
19  
20 744 44. NHS Digital. Adult Psychiatric Morbidity survey.  
21 745 <http://content.digital.nhs.uk/catalogue/PUB21748> (accessed 29 September 2016).
- 22  
23  
24 746 45. NHS. Hospital Episode Statistics. <http://content.digital.nhs.uk/hes> (accessed 10  
25 747 September 2017)
- 26  
27  
28 748 46. Luppá M, Sikorski C, Motzek T, et al. Health service utilization and costs of depressive  
29 749 symptoms in late life – a systematic review. *Curr Pharm Des* 2012;18:5936-57.
- 30  
31  
32 750 47. Ford JD, Trestman RL, Steinberg K, et al. Prospective association of anxiety,  
33 751 depressive, and addictive disorders with high utilization of primary, specialty and  
34 752 emergency medical care. *Soc Sci Med* 2004;58:2145-8 doi:  
35 753 10.1016/j.socscimed.2003.08.017 [published Online First 25 September 2003].
- 36  
37  
38 754 48. Deacon B, Lickel J, Abramowitz JS. Medical utilization across the anxiety disorders. *J*  
39 755 *Anxiety Disord* 2008;22:344-50 doi: 10.1016/j.janxdis.2007.03.004 [published Online  
40 756 First 12 March 2007].
- 41  
42  
43 757 49. Klassen BJ, Porcerelli JH, Markova T. The effects of PTSD symptoms on health care  
44 758 resource utilization in a low-income, urban primary care setting. *J Trauma Stress*  
45 759 2013;26:636-9 doi: 10.1002/jts.21838 [published Online First 12 September 2013].
- 46  
47  
48 760 50. Lehavot K, Der-Martirosian C, Simpson TL, et al. The role of military social support in  
49 761 understanding the relationship between PTSD, physical health, and healthcare  
50 762 utilization in women veterans. *J Trauma Stress*. 2013;26:772–5 doi:  
51 763 10.1002/jts.21859 [published Online First 6 November 2013].  
52 764

1  
2  
3 765 **Figure 1 – Flowchart of EPIC-Norfolk cohort**

4 766 This is a flowchart showing the number of participants at each study stage: the number  
5  
6 767 approached to participate in the EPIC-Norfolk study, the number enrolled at baseline, and  
7  
8 768 with complete data on all covariates. The EPIC-Norfolk study consists of middle-aged and  
9  
10 769 older British people.

11 770

12 771

13 772

14 773

15 774

16 775  
17  
18  
19  
20  
21  
22  
23  
24  
25  
26  
27  
28  
29  
30  
31  
32  
33  
34  
35  
36  
37  
38  
39  
40  
41  
42  
43  
44  
45  
46  
47  
48  
49  
50  
51  
52  
53  
54  
55  
56  
57  
58  
59  
60

For peer review only

Figure 1 - Flowchart of EPIC-Norfolk cohort



Note: Some participants had missing observations on more than one covariate.

Flowchart of the European Prospective Investigation of Cancer (EPIC)-Norfolk cohort. This is a flowchart showing the number of participants at each study stage: the number approached to participate in the EPIC-Norfolk study, the number enrolled at baseline, and with complete data on all covariates. The EPIC-Norfolk study consists of middle-aged and older British people.

153x135mm (300 x 300 DPI)

Appendix I: Table 1 Percentage and number of people with missing past-year GAD reported in 1996-2000 according to sociodemographic factors, health status, and behaviour risk factors for the EPIC-Norfolk cohort

| Characteristic                         | Total number with characteristic | Percentage and no. with missing past-year GAD |
|----------------------------------------|----------------------------------|-----------------------------------------------|
| <b>Socio-demographics</b>              |                                  |                                               |
| <b>Age (years)</b>                     |                                  |                                               |
| <50                                    | 2385                             | 1.1 (26)                                      |
| 50-60                                  | 6279                             | 1.1 (70)                                      |
| 60-70                                  | 5787                             | 0.9 (54)                                      |
| 70+                                    | 3685                             | 1.3 (47)                                      |
| <b>Sex</b>                             |                                  |                                               |
| Women                                  | 10055                            | 1.2 (118)                                     |
| Men                                    | 8081                             | 1.0 (79)                                      |
| <b>Education<sup>†</sup></b>           |                                  |                                               |
| Low                                    | 6178                             | 1.2 (72)                                      |
| High                                   | 11958                            | 1.1 (125)                                     |
| <b>Marital status</b>                  |                                  |                                               |
| Single                                 | 695                              | 1.3 (9)                                       |
| Married                                | 14687                            | 1.0 (149)                                     |
| Other*                                 | 2754                             | 1.4 (39)                                      |
| <b>Social class</b>                    |                                  |                                               |
| Manual                                 | 6918                             | 1.2 (82)                                      |
| Non-manual                             | 11218                            | 1.0 (115)                                     |
| <b>Employment</b>                      |                                  |                                               |
| Yes                                    | 7775                             | 0.8 (63) <sup>b</sup>                         |
| No                                     | 10361                            | 1.3 (134)                                     |
| <b>Health status</b>                   |                                  |                                               |
| <b>Physical conditions<sup>+</sup></b> |                                  |                                               |
| Yes                                    | 9285                             | 1.3 (119) <sup>b</sup>                        |
| No                                     | 8851                             | 0.9 (78)                                      |
| <b>Disability level</b>                |                                  |                                               |
| High <sup>¶</sup>                      | 9030                             | 1.4 (130) <sup>a</sup>                        |
| Low                                    | 9106                             | 0.7 (67)                                      |
| <b>Psychiatric conditions</b>          |                                  |                                               |
| <b>Past-year MDD</b>                   |                                  |                                               |
| Yes                                    | 983                              | 5.0 (49) <sup>a</sup>                         |
| No                                     | 17153                            | 0.9 (148)                                     |
| <b>Behaviour risk factors</b>          |                                  |                                               |
| <b>Physical activity</b>               |                                  |                                               |
| Active <sup>‡</sup>                    | 12963                            | 1.1 (141)                                     |
| Inactive                               | 5173                             | 1.1 (56)                                      |
| <b>Smoking status</b>                  |                                  |                                               |
| Current smoker                         | 1922                             | 1.5 (29)                                      |
| Former smoker                          | 7543                             | 1.0 (73)                                      |

|   |                       |      |                       |
|---|-----------------------|------|-----------------------|
| 1 |                       |      |                       |
| 2 |                       |      |                       |
| 3 | Never smoker          | 8671 | 1.1 (95)              |
| 4 | <b>Alcohol intake</b> |      |                       |
| 5 | High <sup>a</sup>     | 9327 | 0.9 (86) <sup>b</sup> |
| 6 | Low                   | 8809 | 1.3 (111)             |
| 7 |                       |      |                       |
| 8 |                       |      |                       |

9 ‡ High education: O-level, A-level, degree; low education: refers to no education

10 \* Other: divorced, separated, widowed

11 + Physical conditions: respiratory disease (asthma and bronchitis), allergies and hay fever, stroke, heart  
12 attack, cancer, diabetes, thyroid conditions, arthritis

13 ¶ Below the median PCS value of 50.6

14 ¥ Moderately inactive, moderately active, active

15 <sup>a</sup> 3+ units of alc./week (1 pint beer=2 units, 1 glass wine=1 unit, 1 glass sherry=1 unit, 1 glass spirits=1 unit)

16  
17 <sup>a</sup>  $P < 0.001$

18 <sup>b</sup>  $P < 0.05$

19  
20  
21  
22  
23  
24  
25  
26  
27  
28  
29  
30  
31  
32  
33  
34  
35  
36  
37  
38  
39  
40  
41  
42  
43  
44  
45  
46  
47  
48  
49  
50  
51  
52  
53  
54  
55  
56  
57  
58  
59  
60



## Appendix 2 – Multiple imputations for missing data

### 1. Main analysis: association between past-year GAD and non-psychiatric hospital admissions

First, we imputed missing data for all covariates except GAD, our main exposure. Based on the literature, we identified potential auxiliary variables, and we retained those that were correlated with the variables in our model and were good predictors of the missing status (based on statistical tests). Our imputation model included all variables from the analysis model and the auxiliary variables.

To retain as much information as possible, we conducted the imputations on non-transformed data—the original variables in our dataset. We imputed data using the fully conditional specification, and specified a linear regression model for continuous data that were normally distributed; predictive mean matching for continuous data that were not normally distributed; and logistic regression for categorical variables. Variable estimates were subsequently averaged from 100 imputed datasets using Rubin's rules (we transformed the data before running the analytic model of interest within each of the imputed datasets).<sup>1</sup>

We checked whether the imputations were acceptable by comparing 1) the means, standard deviations, and plots of recorded and imputed values for continuous variables, and 2) the frequencies and percentages of recorded and imputed values for each level of categorical variables.

Analyses were done using SAS 9.3 and p-values less than 0.05 were considered statistically significant.

Findings from this set of multiple imputations for missing data analysis provided the following effect estimate relating past-year GAD and non-psychiatric hospital admissions: IRR: 1.04, 95% CI: 1.02, 1.06. The IRR of 1.04 was the same as in the complete case analysis.

The same process was repeated and we imputed missing data for all covariates and also for GAD. This was the effect estimate: IRR: 1.05, 95% CI: 1.03, 1.08.

### 2. Subsidiary analysis: association between GAD-MDD comorbidity and non-psychiatric hospital admissions

When different forms of GAD were considered in relation to health service use, the effect estimate for GAD-MDD comorbidity was the only one that emerged as statistically significant in the complete case analysis. Therefore, we repeated this analysis using multiple imputations for missing data (similar process to that described in the first instance – we imputed missing data for all covariates except for GAD and MDD) and obtained the following result: IRR=1.20, 95% CI: 1.18, 1.22. The IRR is very similar to that obtained in the complete case analysis.

### Auxiliary variables used in the imputation models

| Variable                        | Questionnaire                            | Description of variable                            |
|---------------------------------|------------------------------------------|----------------------------------------------------|
| <b>Sociodemographic factors</b> |                                          |                                                    |
| History of psychiatric illness  | Health and Lifestyle Questionnaire (HLQ) | Self-reported history of other psychiatric illness |
| History of back pain            | Health and Lifestyle Questionnaire (HLQ) | Self-reported history of back pain                 |
| History of cholesterol          | Health and Lifestyle Questionnaire (HLQ) | Self-reported history of cholesterol               |
| History of migraine             | Health and Lifestyle Questionnaire (HLQ) | Self-reported history of migraine                  |
| History of tumour               | Health and Lifestyle Questionnaire (HLQ) | Self-reported history of tumour                    |

The questionnaire used for these variables have been previously described in the methods.

### References

1. Berglund P, Heeringa S. Multiple imputation of missing data using SAS. Cary, NC: SAS Institute Inc, 2014.

Please see the article line numbers (column on the right) and the explanations provided.

STROBE Statement—checklist of items that should be included in reports of observational studies

|                           | Item No | Recommendation                                                                                                                                                                                                                                                                                                                                                                                                                                                         | Line numbers within the article                               |
|---------------------------|---------|------------------------------------------------------------------------------------------------------------------------------------------------------------------------------------------------------------------------------------------------------------------------------------------------------------------------------------------------------------------------------------------------------------------------------------------------------------------------|---------------------------------------------------------------|
| <b>Title and abstract</b> | 1       | (a) Indicate the study's design with a commonly used term in the title or the abstract                                                                                                                                                                                                                                                                                                                                                                                 | 9, 44                                                         |
|                           |         | (b) Provide in the abstract an informative and balanced summary of what was done and what was found                                                                                                                                                                                                                                                                                                                                                                    | 35-68                                                         |
| <b>Introduction</b>       |         |                                                                                                                                                                                                                                                                                                                                                                                                                                                                        |                                                               |
| Background/rationale      | 2       | Explain the scientific background and rationale for the investigation being reported                                                                                                                                                                                                                                                                                                                                                                                   | 94-141                                                        |
| Objectives                | 3       | State specific objectives, including any prespecified hypotheses                                                                                                                                                                                                                                                                                                                                                                                                       | 143-147                                                       |
| <b>Methods</b>            |         |                                                                                                                                                                                                                                                                                                                                                                                                                                                                        |                                                               |
| Study design              | 4       | Present key elements of study design early in the paper                                                                                                                                                                                                                                                                                                                                                                                                                | 155                                                           |
| Setting                   | 5       | Describe the setting, locations, and relevant dates, including periods of recruitment, exposure, follow-up, and data collection                                                                                                                                                                                                                                                                                                                                        | 154-165, 227-228                                              |
| Participants              | 6       | (a) <i>Cohort study</i> —Give the eligibility criteria, and the sources and methods of selection of participants. Describe methods of follow-up<br><i>Case-control study</i> —Give the eligibility criteria, and the sources and methods of case ascertainment and control selection. Give the rationale for the choice of cases and controls<br><i>Cross-sectional study</i> —Give the eligibility criteria, and the sources and methods of selection of participants | 154-157, 159-161, 163-165, and especially 167-169             |
|                           |         | (b) <i>Cohort study</i> —For matched studies, give matching criteria and number of exposed and unexposed<br><i>Case-control study</i> —For matched studies, give matching criteria and the number of controls per case                                                                                                                                                                                                                                                 |                                                               |
| Variables                 | 7       | Clearly define all outcomes, exposures, predictors, potential confounders, and effect modifiers. Give diagnostic criteria, if applicable                                                                                                                                                                                                                                                                                                                               | Outcome: 222-245<br>Exposure: 171-181<br>Confounders: 182-220 |
| Data sources/             | 8*      | For each variable of interest, give sources of data and details of methods of                                                                                                                                                                                                                                                                                                                                                                                          | There were two variables of interest in this study:           |

|                        |    |                                                                                                                                                                                                                                                                                                                                                                                                        |                                                                                                                                                                                                                                                                                                                                                                                                                                                                                                                                             |
|------------------------|----|--------------------------------------------------------------------------------------------------------------------------------------------------------------------------------------------------------------------------------------------------------------------------------------------------------------------------------------------------------------------------------------------------------|---------------------------------------------------------------------------------------------------------------------------------------------------------------------------------------------------------------------------------------------------------------------------------------------------------------------------------------------------------------------------------------------------------------------------------------------------------------------------------------------------------------------------------------------|
| measurement            |    | assessment (measurement). Describe comparability of assessment methods if there is more than one group                                                                                                                                                                                                                                                                                                 | health service use and generalized anxiety disorder (222-248, 171-181). The others are potential confounders – in the methods I list them all, indicate how they were assessed and mention that they were collected through the baseline, self-reported postal HLQ questionnaire.                                                                                                                                                                                                                                                           |
| Bias                   | 9  | Describe any efforts to address potential sources of bias                                                                                                                                                                                                                                                                                                                                              | I conducted a complete case analysis, followed by multiple imputations of missing data.                                                                                                                                                                                                                                                                                                                                                                                                                                                     |
| Study size             | 10 | Explain how the study size was arrived at                                                                                                                                                                                                                                                                                                                                                              | 280-282                                                                                                                                                                                                                                                                                                                                                                                                                                                                                                                                     |
| Quantitative variables | 11 | Explain how quantitative variables were handled in the analyses. If applicable, describe which groupings were chosen and why                                                                                                                                                                                                                                                                           | How the variables were handled in analyses: 252-278<br><br>I mention that these groupings were based on the literature and provide the relevant citations.<br><br>How the outcome variable was created: 224-245<br>How GAD was created: 173-181<br>Covariates: 184-220; I mention that the final categorization of the variables was also done in accordance with previous literature and I cite the relevant studies.                                                                                                                      |
| Statistical methods    | 12 | (a) Describe all statistical methods, including those used to control for confounding<br>(b) Describe any methods used to examine subgroups and interactions<br><br>(c) Explain how missing data were addressed<br><br>(d) <i>Cohort study</i> —If applicable, explain how loss to follow-up was addressed<br><i>Case-control study</i> —If applicable, explain how matching of cases and controls was | 250-278<br><br>There were no subgroups or interactions examined. In addition to the main question (if past-year GAD leads to higher health service use), we also determined whether GAD frequency, chronicity, age at onset, and comorbidity with MDD are associated with health service use – this is explained in lines 271-278.<br><br>We did a complete-case analysis followed by multiple imputations for missing data.<br><br>Loss to follow-up was not a problem in this study.<br>We were able to track down all participants using |

1  
2  
3  
4 addressed

5 *Cross-sectional study*—If applicable, describe analytical methods taking account of  
6 sampling strategy  
7

various means, unless they expressed that they wished  
to be removed from the mailing list. We elaborate on  
this in the manuscript.

---

8 (e) Describe any sensitivity analyses  
9  
10  
11  
12  
13  
14  
15  
16  
17  
18  
19  
20  
21  
22  
23  
24  
25  
26  
27  
28  
29  
30  
31  
32  
33  
34  
35  
36  
37  
38  
39  
40  
41  
42  
43  
44  
45

For peer review only

Results

|                  |     |                                                                                                                                                                                                              |                                                                                                                                                                                                                                                                                                                                                                                                                                                                                                                                                             |
|------------------|-----|--------------------------------------------------------------------------------------------------------------------------------------------------------------------------------------------------------------|-------------------------------------------------------------------------------------------------------------------------------------------------------------------------------------------------------------------------------------------------------------------------------------------------------------------------------------------------------------------------------------------------------------------------------------------------------------------------------------------------------------------------------------------------------------|
| Participants     | 13* | (a) Report numbers of individuals at each stage of study—eg numbers potentially eligible, examined for eligibility, confirmed eligible, included in the study, completing follow-up, and analysed            |                                                                                                                                                                                                                                                                                                                                                                                                                                                                                                                                                             |
|                  |     | (b) Give reasons for non-participation at each stage                                                                                                                                                         | We do not have the reasons for non-participation, because these data were not collected when the study was initiated in 1993.                                                                                                                                                                                                                                                                                                                                                                                                                               |
|                  |     | (c) Consider use of a flow diagram                                                                                                                                                                           | Flow diagram included in submission – figure 1.                                                                                                                                                                                                                                                                                                                                                                                                                                                                                                             |
| Descriptive data | 14* | (a) Give characteristics of study participants (eg demographic, clinical, social) and information on exposures and potential confounders                                                                     | 301-302, 320-324, 341-344, as well as, tables 1 and 2                                                                                                                                                                                                                                                                                                                                                                                                                                                                                                       |
|                  |     | (b) Indicate number of participants with missing data for each variable of interest                                                                                                                          | See flow diagram.                                                                                                                                                                                                                                                                                                                                                                                                                                                                                                                                           |
|                  |     | (c) Cohort study—Summarise follow-up time (eg, average and total amount)                                                                                                                                     | 298-299                                                                                                                                                                                                                                                                                                                                                                                                                                                                                                                                                     |
| Outcome data     | 15* | Cohort study—Report numbers of outcome events or summary measures over time                                                                                                                                  | Table 2 provides the mean number of hospital admissions for those with/without GAD over the 9-year follow-up.                                                                                                                                                                                                                                                                                                                                                                                                                                               |
|                  |     | Case-control study—Report numbers in each exposure category, or summary measures of exposure                                                                                                                 |                                                                                                                                                                                                                                                                                                                                                                                                                                                                                                                                                             |
|                  |     | Cross-sectional study—Report numbers of outcome events or summary measures                                                                                                                                   |                                                                                                                                                                                                                                                                                                                                                                                                                                                                                                                                                             |
| Main results     | 16  | (a) Give unadjusted estimates and, if applicable, confounder-adjusted estimates and their precision (eg, 95% confidence interval). Make clear which confounders were adjusted for and why they were included | Tables 3 and 4 contain unadjusted and progressively adjusted estimates. We also discussed the findings within the text, and provide odds ratios and 95% confidence intervals.<br><br>We included the confounders based on the literature – we mention this in the paper and cite relevant literature. As per strobe, we included this information in the methods section; and we omitted repeating this in the results section to reduce redundancy. However, if the editor would like us to repeat this information in the results, we are happy to do so. |

|                          |    |                                                                                                                                                                            |                                                                                                                                                                                                                                                                          |
|--------------------------|----|----------------------------------------------------------------------------------------------------------------------------------------------------------------------------|--------------------------------------------------------------------------------------------------------------------------------------------------------------------------------------------------------------------------------------------------------------------------|
|                          |    | (b) Report category boundaries when continuous variables were categorized                                                                                                  | The cut-offs for age, alcohol intake, and disability levels are provided (see also footnotes of tables).                                                                                                                                                                 |
|                          |    | (c) If relevant, consider translating estimates of relative risk into absolute risk for a meaningful time period                                                           |                                                                                                                                                                                                                                                                          |
| Other analyses           | 17 | Report other analyses done—eg analyses of subgroups and interactions, and sensitivity analyses                                                                             | The Results section contains the findings from the multiple imputations for missing data analysis – we also included further information on this in an appendix. Findings for GAD frequency, chronicity, age of onset, and comorbidity with MDD are reported in table 4. |
| <b>Discussion</b>        |    |                                                                                                                                                                            |                                                                                                                                                                                                                                                                          |
| Key results              | 18 | Summarise key results with reference to study objectives                                                                                                                   | 415-423                                                                                                                                                                                                                                                                  |
| Limitations              | 19 | Discuss limitations of the study, taking into account sources of potential bias or imprecision. Discuss both direction and magnitude of any potential bias                 | 439-477                                                                                                                                                                                                                                                                  |
| Interpretation           | 20 | Give a cautious overall interpretation of results considering objectives, limitations, multiplicity of analyses, results from similar studies, and other relevant evidence | 514-546 (We also have a section comparing our study results to those of others: 479-499, as well as a section on potential mechanisms explaining our findings: 501-512)                                                                                                  |
| Generalisability         | 21 | Discuss the generalisability (external validity) of the study results                                                                                                      | 472-474, 460-469                                                                                                                                                                                                                                                         |
| <b>Other information</b> |    |                                                                                                                                                                            |                                                                                                                                                                                                                                                                          |
| Funding                  | 22 | Give the source of funding and the role of the funders for the present study and, if applicable, for the original study on which the present article is based              | 562-563, 579-581                                                                                                                                                                                                                                                         |

\*Give information separately for cases and controls in case-control studies and, if applicable, for exposed and unexposed groups in cohort and cross-sectional studies.

**Note:** An Explanation and Elaboration article discusses each checklist item and gives methodological background and published examples of transparent reporting. The STROBE checklist is best used in conjunction with this article (freely available on the Web sites of PLoS Medicine at <http://www.plosmedicine.org/>, Annals of Internal Medicine at <http://www.annals.org/>, and Epidemiology at <http://www.epidem.com/>). Information on the STROBE Initiative is available at [www.strobe-statement.org](http://www.strobe-statement.org).
