# Supplementary material for: Generalised anxiety disorder and hospital admissions: findings from a large, population cohort study
Source: PubMed Central journal article supplement (PMC6224748; doi:10.1136/bmjopen-2017-018539), 2018-10-27
Supplement: bmjopen-2017-018539supp001.pdf [file bmjopen-2017-018539supp001.pdf]

**Appendix I: Table 1 Percentage and number of people with missing past-year GAD reported in 1996-2000 according to sociodemographic factors, health status, and behaviour risk factors for the EPIC-Norfolk cohort**

|                                        | Total number with characteristic | Percentage and no. with missing past-year GAD |
|----------------------------------------|----------------------------------|-----------------------------------------------|
| <b>Characteristic</b>                  |                                  |                                               |
| <b>Socio-demographics</b>              |                                  |                                               |
| <b>Age (years)</b>                     |                                  |                                               |
| <50                                    | 2385                             | 1.1 (26)                                      |
| 50-60                                  | 6279                             | 1.1 (70)                                      |
| 60-70                                  | 5787                             | 0.9 (54)                                      |
| 70+                                    | 3685                             | 1.3 (47)                                      |
| <b>Sex</b>                             |                                  |                                               |
| Women                                  | 10055                            | 1.2 (118)                                     |
| Men                                    | 8081                             | 1.0 (79)                                      |
| <b>Education<sup>†</sup></b>           |                                  |                                               |
| Low                                    | 6178                             | 1.2 (72)                                      |
| High                                   | 11958                            | 1.1 (125)                                     |
| <b>Marital status</b>                  |                                  |                                               |
| Single                                 | 695                              | 1.3 (9)                                       |
| Married                                | 14687                            | 1.0 (149)                                     |
| Other*                                 | 2754                             | 1.4 (39)                                      |
| <b>Social class</b>                    |                                  |                                               |
| Manual                                 | 6918                             | 1.2 (82)                                      |
| Non-manual                             | 11218                            | 1.0 (115)                                     |
| <b>Employment</b>                      |                                  |                                               |
| Yes                                    | 7775                             | 0.8 (63) <sup>b</sup>                         |
| No                                     | 10361                            | 1.3 (134)                                     |
| <b>Health status</b>                   |                                  |                                               |
| <b>Physical conditions<sup>+</sup></b> |                                  |                                               |
| Yes                                    | 9285                             | 1.3 (119) <sup>b</sup>                        |
| No                                     | 8851                             | 0.9 (78)                                      |
| <b>Disability level</b>                |                                  |                                               |
| High <sup>¶</sup>                      | 9030                             | 1.4 (130) <sup>a</sup>                        |
| Low                                    | 9106                             | 0.7 (67)                                      |
| <b>Psychiatric conditions</b>          |                                  |                                               |
| <b>Past-year MDD</b>                   |                                  |                                               |
| Yes                                    | 983                              | 5.0 (49) <sup>a</sup>                         |
| No                                     | 17153                            | 0.9 (148)                                     |
| <b>Behaviour risk factors</b>          |                                  |                                               |
| <b>Physical activity</b>               |                                  |                                               |
| Active <sup>‡</sup>                    | 12963                            | 1.1 (141)                                     |
| Inactive                               | 5173                             | 1.1 (56)                                      |
| <b>Smoking status</b>                  |                                  |                                               |
| Current smoker                         | 1922                             | 1.5 (29)                                      |
| Former smoker                          | 7543                             | 1.0 (73)                                      |

|                       |      |                       |
|-----------------------|------|-----------------------|
| Never smoker          | 8671 | 1.1 (95)              |
| <b>Alcohol intake</b> |      |                       |
| High <sup>a</sup>     | 9327 | 0.9 (86) <sup>b</sup> |
| Low                   | 8809 | 1.3 (111)             |

‡ High education: O-level, A-level, degree; low education: refers to no education

\* Other: divorced, separated, widowed

+ Physical conditions: respiratory disease (asthma and bronchitis), allergies and hay fever, stroke, heart attack, cancer, diabetes, thyroid conditions, arthritis

¶ Below the median PCS value of 50.6

¥ Moderately inactive, moderately active, active

<sup>a</sup> 3+ units of alc./week (1 pint beer=2 units, 1 glass wine=1 unit, 1 glass sherry=1 unit, 1 glass spirits=1 unit)

<sup>a</sup>  $P < 0.001$

<sup>b</sup>  $P < 0.05$
